# Supplementary material for: Metaphase chromosome structure is dynamically maintained by condensin I-directed DNA (de)catenation
Source: eLife. 2017 May 6;6:e26120. doi: 10.7554/eLife.26120 (PMC5451211; doi:10.7554/eLife.26120)
Supplement: Figure 3—source data 1. — Individual measurements of centromeres displacement (Figure 3f) and relative Mean voxel intensity, relative volume and relative surface area (Figure 3g). Each data set is presented on a separate sheet. DOI: http://dx.doi.org/10.7554/eLife.26120.009 [file elife-26120-fig3-data1.xlsx]

## Sheet: centromere displacement
Distance (um)	Buffer								TEV											TEV+ICRF												ICRF
0	0.104692	0.134488	0.133916	0.159661	0.118611	0.197977	0.132762		0.294606	0.218957	0.191525	0.238909	0.148647	0.350862	0.285401	0.292177	0.275495	0.217177		0.195611	0.155403	0.287809	0.161582	0.1687	0.15841	0.260641	0.248512	0.207824	0.213195	0.256822	0.240195	0.145948	0.206744	0.0804241	0.147799	0.101708	0.168988	0.226043	0.129089
0.13	0.113162	0.143831	0.127303	0.158118	0.111501	0.191701	0.148001		0.310741	0.220002	0.203081	0.242347	0.140784	0.32562	0.27029	0.28643	0.268585	0.199517		0.213029	0.16128	0.300876	0.166171	0.166353	0.17695	0.249583	0.237559	0.21836	0.197234	0.248211	0.241181	0.161311	0.191695	0.0848655	0.153278	0.106339	0.177692	0.216735	0.123978
0.26	0.114172	0.140498	0.138471	0.147389	0.119752	0.218243	0.149987		0.299315	0.202352	0.196856	0.246304	0.128699	0.344985	0.283354	0.331948	0.278004	0.226562		0.199786	0.165145	0.280134	0.171285	0.155623	0.16586	0.263257	0.234345	0.198074	0.202751	0.264325	0.236931	0.156601	0.186067	0.0894077	0.155363	0.102422	0.17962	0.23388	0.137128
0.39	0.108035	0.139049	0.135756	0.145917	0.117615	0.211969	0.139037		0.278192	0.220539	0.192256	0.229849	0.128184	0.36205	0.276929	0.309541	0.278316	0.214862		0.216988	0.172391	0.277456	0.175639	0.161721	0.178847	0.279498	0.24538	0.203068	0.186923	0.279269	0.244915	0.149596	0.198408	0.0790156	0.152649	0.103665	0.176518	0.224151	0.135017
0.52	0.111359	0.126938	0.123809	0.149476	0.120186	0.20919	0.156615		0.311255	0.216773	0.201526	0.213856	0.133205	0.365696	0.282201	0.307558	0.281608	0.218588		0.216048	0.175733	0.301643	0.161888	0.167755	0.180041	0.268088	0.251416	0.207841	0.195254	0.293598	0.232403	0.150993	0.201079	0.0784303	0.141511	0.106742	0.173817	0.214432	0.12586
0.65	0.105327	0.143071	0.132051	0.149558	0.120005	0.215207	0.146578		0.293891	0.20976	0.204	0.229331	0.135706	0.360441	0.281327	0.32265	0.267643	0.239662		0.219235	0.16325	0.29108	0.154147	0.177149	0.177133	0.270782	0.263813	0.209506	0.194072	0.268765	0.242871	0.142712	0.191763	0.0893711	0.158196	0.108986	0.172416	0.223975	0.131617
0.78	0.109549	0.136777	0.137006	0.148776	0.115934	0.183869	0.142967		0.29208	0.207324	0.193368	0.22755	0.143528	0.356591	0.289935	0.319308	0.269369	0.237126		0.192771	0.155891	0.262176	0.165236	0.166346	0.165304	0.252391	0.249952	0.206514	0.198155	0.266788	0.241073	0.150598	0.19864	0.080615	0.151627	0.11264	0.181443	0.232178	0.141139
0.91	0.110938	0.137473	0.137489	0.155586	0.128053	0.184253	0.142508		0.299627	0.227167	0.201981	0.225734	0.147228	0.341974	0.296276	0.313669	0.288503	0.232326		0.201536	0.168248	0.28527	0.165579	0.168054	0.163388	0.24736	0.245642	0.214105	0.209352	0.249269	0.238048	0.150478	0.205759	0.0829377	0.154721	0.115367	0.176136	0.248383	0.142463
1.04	0.106936	0.134915	0.132003	0.152743	0.118996	0.180665	0.146008		0.274814	0.226976	0.202698	0.237303	0.141549	0.356869	0.309502	0.306005	0.270475	0.249955		0.186159	0.184879	0.2882	0.177864	0.161197	0.175115	0.273553	0.260159	0.206961	0.214577	0.247112	0.237949	0.155027	0.196508	0.0876235	0.159358	0.11033	0.166309	0.228756	0.134275
1.17	0.107195	0.141219	0.132493	0.136985	0.126287	0.201095	0.156499		0.308196	0.208744	0.204779	0.235386	0.14183	0.374621	0.325756	0.302985	0.285404	0.225994		0.186184	0.185792	0.295568	0.16212	0.157511	0.176148	0.260776	0.252315	0.192641	0.193827	0.230028	0.221368	0.154844	0.198734	0.0844723	0.154349	0.11556	0.177841	0.236168	0.12668
1.3	0.107809	0.136658	0.145203	0.146352	0.125166	0.188851	0.149698		0.287095	0.201756	0.185962	0.231302	0.144789	0.3539	0.28594	0.298324	0.26848	0.223486		0.188585	0.190694	0.309251	0.165839	0.158148	0.190739	0.269841	0.245346	0.214084	0.1995	0.246693	0.234142	0.155075	0.173359	0.0861975	0.151983	0.118467	0.155567	0.230291	0.136746
1.43	0.117009	0.137028	0.136918	0.147372	0.131319	0.191596	0.148276		0.287641	0.221266	0.186346	0.213298	0.145898	0.380517	0.278867	0.296005	0.287834	0.240019		0.183623	0.180765	0.305338	0.16138	0.179184	0.185514	0.274327	0.260236	0.204749	0.200814	0.267217	0.221295	0.156898	0.195142	0.0902461	0.160351	0.122205	0.161431	0.234496	0.136068
1.56	0.118942	0.14642	0.136818	0.171765	0.13765	0.169297	0.143998		0.292264	0.230339	0.191564	0.242574	0.145183	0.371936	0.304127	0.284348	0.293682	0.231477		0.20764	0.177114	0.318838	0.150711	0.170867	0.170862	0.29167	0.247679	0.212031	0.19807	0.256601	0.241263	0.170548	0.200365	0.0922211	0.164665	0.122461	0.1708	0.250043	0.136095
1.69	0.118919	0.141654	0.140229	0.159261	0.132802	0.161713	0.159417		0.296681	0.221608	0.205177	0.24145	0.127483	0.341682	0.301622	0.285478	0.279783	0.242687		0.217392	0.194764	0.295929	0.154313	0.162467	0.176966	0.285976	0.257869	0.214197	0.206696	0.269766	0.229403	0.168794	0.197487	0.0916316	0.163094	0.12756	0.169256	0.250314	0.145777
1.82	0.114227	0.141802	0.1539	0.157014	0.131921	0.184794	0.158684		0.313368	0.218273	0.200358	0.224855	0.138556	0.366173	0.302656	0.287538	0.282852	0.247876		0.19527	0.191362	0.324986	0.151929	0.177756	0.179601	0.288483	0.276345	0.201986	0.224694	0.271958	0.233812	0.17133	0.190854	0.0906654	0.159429	0.138719	0.184104	0.254118	0.150615
1.95	0.118219	0.138422	0.154221	0.153111	0.125538	0.181625	0.176991		0.276027	0.230016	0.200427	0.23065	0.128061	0.366393	0.326786	0.291996	0.264241	0.234308		0.222689	0.193164	0.308242	0.142326	0.185381	0.166946	0.290221	0.264242	0.212286	0.226642	0.269213	0.229724	0.187118	0.197929	0.093919	0.16628	0.132977	0.181661	0.254228	0.145043
2.08	0.119803	0.141458	0.164384	0.172016	0.137331	0.173594	0.161571		0.271359	0.23512	0.206949	0.22165	0.130807	0.348903	0.31244	0.295327	0.262126	0.228644		0.225296	0.188314	0.322204	0.159277	0.181449	0.187937	0.289125	0.256556	0.222828	0.217968	0.267371	0.236488	0.193646	0.20396	0.107431	0.189719	0.136695	0.187934	0.237664	0.147043
2.21	0.122551	0.148968	0.161577	0.168313	0.139175	0.18476	0.160685		0.267005	0.242534	0.219401	0.210371	0.135044	0.356675	0.323687	0.273724	0.249199	0.236403		0.205507	0.215937	0.329697	0.161885	0.178509	0.188933	0.282517	0.264387	0.225086	0.215159	0.258099	0.243135	0.195616	0.202328	0.0988664	0.193581	0.128964	0.175365	0.244514	0.153629
2.34	0.128156	0.143772	0.156573	0.163552	0.134824	0.194159	0.18134		0.292991	0.236297	0.203829	0.206666	0.138894	0.344292	0.304736	0.293389	0.276212	0.254169		0.193821	0.215745	0.340846	0.158636	0.177462	0.192921	0.27721	0.256847	0.214524	0.232593	0.271364	0.241982	0.201075	0.197296	0.100251	0.183228	0.135732	0.183885	0.271212	0.150724
2.47	0.134759	0.157711	0.173017	0.167591	0.138616	0.175541	0.192604		0.299723	0.243818	0.216658	0.223374	0.143062	0.344159	0.346141	0.300823	0.273086	0.232569		0.19699	0.235053	0.325386	0.160802	0.199607	0.19174	0.265971	0.278792	0.21422	0.224651	0.277514	0.251781	0.194106	0.205063	0.102493	0.192151	0.143276	0.181407	0.275188	0.150262
2.6	0.128331	0.150907	0.171015	0.178259	0.135554	0.184215	0.189145		0.250385	0.240912	0.231875	0.228769	0.152143	0.343466	0.346963	0.26977	0.271046	0.228882		0.207451	0.237739	0.331237	0.153707	0.181896	0.2045	0.269202	0.265151	0.207723	0.22685	0.27287	0.262824	0.202901	0.198647	0.116982	0.202558	0.144936	0.184852	0.287012	0.159833
2.73	0.130064	0.150065	0.155942	0.187244	0.142969	0.185921	0.177911		0.283722	0.254287	0.258422	0.240235	0.149547	0.368806	0.336723	0.282422	0.280854	0.242312		0.208928	0.241227	0.350837	0.159104	0.214229	0.195728	0.273598	0.276455	0.210581	0.238926	0.274109	0.25812	0.210592	0.184382	0.113274	0.201279	0.154359	0.200824	0.287201	0.153976
2.86	0.124374	0.171137	0.165611	0.189111	0.152948	0.188665	0.191825		0.284877	0.247832	0.253053	0.224343	0.148728	0.35994	0.338641	0.268576	0.29586	0.270682		0.186253	0.249239	0.344243	0.162597	0.208723	0.203344	0.284436	0.280449	0.223076	0.254268	0.286847	0.259506	0.216752	0.187046	0.111925	0.213512	0.153982	0.209961	0.27604	0.156553
2.99	0.135865	0.158624	0.169752	0.206039	0.161875	0.193242	0.202676		0.27774	0.255693	0.258166	0.203854	0.159731	0.36897	0.36162	0.278787	0.312456	0.259497		0.205673	0.242378	0.342674	0.164454	0.204585	0.210858	0.283405	0.27381	0.212183	0.242789	0.315843	0.27093	0.213362	0.200833	0.127567	0.22722	0.160678	0.20536	0.266798	0.160174
3.12	0.142863	0.166597	0.176993	0.193955	0.155989	0.21351	0.197997		0.266536	0.258472	0.278017	0.212872	0.161416	0.345206	0.374491	0.280485	0.30714	0.281556		0.21664	0.265763	0.351534	0.172449	0.224951	0.210001	0.290368	0.305552	0.220636	0.240115	0.313095	0.282392	0.225261	0.213451	0.129368	0.240921	0.167841	0.205507	0.281362	0.155893
3.25	0.145568	0.169393	0.180007	0.204771	0.170038	0.211155	0.205566		0.278119	0.271501	0.278571	0.217918	0.165427	0.367221	0.414318	0.296484	0.321547	0.289876		0.206509	0.267726	0.376323	0.199843	0.215125	0.234172	0.295019	0.288595	0.2222	0.258342	0.317164	0.27899	0.233446	0.215325	0.138621	0.234102	0.166412	0.204286	0.293284	0.165637
3.38	0.148477	0.174244	0.200947	0.194381	0.176521	0.216801	0.204038		0.306021	0.270314	0.274962	0.228064	0.175197	0.374421	0.403203	0.311092	0.340201	0.308526		0.202038	0.278692	0.389183	0.183874	0.21613	0.226675	0.30759	0.282051	0.209889	0.257856	0.349787	0.310969	0.245489	0.214164	0.142394	0.244426	0.176571	0.227466	0.290263	0.174487
3.51	0.146203	0.191183	0.213366	0.21249	0.171395	0.216553	0.216453		0.29374	0.29529	0.301052	0.229199	0.171187	0.346662	0.406172	0.302395	0.336004	0.297058		0.20144	0.297394	0.430359	0.185968	0.224467	0.244243	0.316152	0.322762	0.224159	0.270297	0.334305	0.308176	0.235006	0.210632	0.146981	0.24281	0.181452	0.21944	0.318104	0.170249
3.64	0.146161	0.193906	0.211296	0.214874	0.188449	0.236083	0.209088		0.284978	0.328421	0.303194	0.237109	0.174392	0.39433	0.416159	0.321856	0.353818	0.325343		0.198501	0.302737	0.452552	0.196074	0.222446	0.259921	0.355591	0.294289	0.224992	0.284623	0.341883	0.307491	0.236836	0.222484	0.162645	0.250175	0.205348	0.228471	0.306945	0.179576
3.77	0.153992	0.197314	0.228819	0.207268	0.205758	0.237339	0.208191		0.321004	0.322837	0.329273	0.246809	0.172189	0.38319	0.416698	0.316224	0.350425	0.353557		0.202262	0.324012	0.461603	0.187286	0.233221	0.258432	0.363966	0.32024	0.222959	0.285368	0.360624	0.313803	0.248733	0.211614	0.171788	0.270048	0.212358	0.235193	0.306316	0.179084
3.9	0.157351	0.210783	0.23999	0.218187	0.221186	0.234864	0.241724		0.316097	0.342748	0.359673	0.229673	0.18231	0.395136	0.456732	0.332233	0.363792	0.351238		0.214743	0.335094	0.501132	0.204763	0.251184	0.27666	0.381496	0.312821	0.222859	0.307008	0.373696	0.318796	0.253903	0.227494	0.172031	0.273863	0.225461	0.243155	0.312982	0.192303
4.03	0.160199	0.205389	0.259411	0.216917	0.229666	0.255029	0.22966		0.334175	0.336755	0.376041	0.242774	0.180469	0.377825	0.486127	0.319527	0.391987	0.379244		0.212918	0.349807	0.532682	0.215635	0.263953	0.285972	0.420285	0.322933	0.225003	0.283777	0.364455	0.318968	0.270694	0.22553	0.188599	0.280598	0.229428	0.26888	0.335297	0.195543
4.16	0.173393	0.215485	0.272943	0.230136	0.241518	0.277868	0.241552		0.351318	0.397742	0.415477	0.250464	0.191981	0.359519	0.558966	0.326558	0.423617	0.413019		0.219593	0.386825	0.564813	0.228317	0.272614	0.293871	0.44123	0.340921	0.236738	0.307772	0.359974	0.343455	0.274201	0.233251	0.205536	0.294204	0.234668	0.267406	0.342513	0.197907
4.29	0.17559	0.220851	0.28665	0.247178	0.258937	0.27459	0.257391		0.372515	0.460134	0.434165	0.236186	0.195927	0.414751	0.571985	0.317673	0.482096	0.445394		0.219756	0.416028	0.561065	0.225992	0.287571	0.305976	0.462377	0.363372	0.244271	0.312681	0.382684	0.364319	0.272478	0.25421	0.217197	0.306498	0.247203	0.266485	0.330139	0.201902
4.42	0.187279	0.23384	0.304664	0.255674	0.267331	0.275772	0.280336		0.406116	0.510831	0.451939	0.258507	0.205592	0.401309	0.626877	0.337055	0.555925	0.500799		0.23692	0.459669	0.611073	0.234713	0.2901	0.343861	0.479044	0.355583	0.261059	0.334725	0.383031	0.374167	0.294756	0.244149	0.232201	0.314176	0.256806	0.298247	0.346377	0.20525
4.55	0.193427	0.255351	0.303439	0.264707	0.291226	0.282139	0.292465		0.433577	0.537051	0.492674	0.267266	0.223437	0.436389	0.665054	0.356427	0.590158	0.600134		0.260054	0.498765	0.636634	0.235455	0.321745	0.361566	0.539205	0.398027	0.258008	0.365411	0.412068	0.40532	0.305699	0.271512	0.237089	0.326279	0.284851	0.317431	0.348135	0.213552
4.68	0.201053	0.262934	0.321046	0.268489	0.297782	0.286191	0.292967		0.524454	0.575032	0.520491	0.274566	0.251808	0.492613	0.689358	0.362867	0.650521	0.661827		0.305378	0.510858	0.709277	0.264966	0.364986	0.406323	0.600662	0.427194	0.278793	0.395097	0.3957	0.442542	0.311283	0.273034	0.255572	0.35301	0.295932	0.348279	0.363777	0.233846
4.81	0.201383	0.291496	0.352185	0.27937	0.331835	0.319776	0.304871		0.63364	0.659417	0.583356	0.294619	0.296858	0.531681	0.681798	0.382276	0.763229	0.72475		0.326486	0.529777	0.76366	0.285528	0.394694	0.452254	0.656211	0.469278	0.325231	0.421369	0.409153	0.453588	0.313308	0.289309	0.289037	0.37028	0.307522	0.351032	0.377665	0.249808
4.94	0.221922	0.310487	0.382238	0.304521	0.359472	0.344871	0.320913		0.706885	0.714719	0.643106	0.330668	0.343042	0.647005	0.685345	0.421209	0.810957	0.801954		0.351777	0.570343	0.846323	0.314249	0.443184	0.493536	0.747459	0.50648	0.369797	0.470181	0.465163	0.469816	0.350749	0.304468	0.311348	0.372854	0.335335	0.378695	0.363994	0.277831
5.07	0.246229	0.335654	0.395679	0.314701	0.383817	0.366396	0.359352		0.789021	0.763204	0.739588	0.435603	0.397837	0.722175	0.662802	0.443909	0.775312	0.847795		0.424841	0.621221	0.838473	0.388401	0.474848	0.570146	0.838593	0.548527	0.426058	0.532446	0.53099	0.504561	0.393973	0.316968	0.352932	0.40882	0.353176	0.443105	0.384847	0.294582
5.2	0.285213	0.383654	0.417129	0.3576	0.411401	0.390328	0.38002		0.840748	0.816935	0.791632	0.549311	0.436277	0.763734	0.67577	0.482942	0.727499	0.859755		0.490895	0.69551	0.80488	0.520369	0.565005	0.6903	0.817383	0.608703	0.505758	0.612972	0.601277	0.584123	0.451	0.379183	0.406724	0.445932	0.390433	0.479098	0.398815	0.308288
5.33	0.335261	0.436256	0.469901	0.39066	0.479328	0.413906	0.426925		0.817591	0.837759	0.814081	0.655505	0.512232	0.798489	0.632931	0.554147	0.697767	0.840841		0.587979	0.773977	0.793491	0.645483	0.675444	0.812501	0.811042	0.685832	0.632547	0.68419	0.75018	0.615168	0.524066	0.415599	0.492812	0.493057	0.456303	0.545146	0.418404	0.368315
5.46	0.392044	0.503866	0.565555	0.475653	0.551538	0.450158	0.486857		0.691693	0.815798	0.834309	0.727494	0.611061	0.820888	0.633715	0.593746	0.651655	0.772268		0.693335	0.788907	0.719058	0.769791	0.828161	0.876297	0.766637	0.744965	0.788153	0.734081	0.834293	0.715444	0.596479	0.4718	0.59467	0.565553	0.533465	0.594924	0.457561	0.452558
5.59	0.480247	0.602847	0.677042	0.571868	0.643343	0.517678	0.631125		0.607397	0.725069	0.816882	0.79098	0.734215	0.791796	0.627271	0.711929	0.608302	0.697813		0.815968	0.812851	0.661808	0.868471	0.924712	0.833622	0.720859	0.757127	0.896463	0.77503	0.880398	0.760824	0.687018	0.594481	0.699415	0.654226	0.637096	0.662781	0.544063	0.543597
5.72	0.607273	0.712068	0.74685	0.652697	0.739102	0.641614	0.769069		0.527172	0.707204	0.796086	0.777454	0.821526	0.737516	0.564917	0.742569	0.591292	0.600139		0.911784	0.818244	0.634378	0.925099	0.891171	0.807495	0.67126	0.784589	0.913856	0.788179	0.876937	0.797555	0.745065	0.72588	0.800887	0.779967	0.753965	0.744149	0.626769	0.670526
5.85	0.748188	0.838284	0.815696	0.739366	0.844352	0.760799	0.873929		0.461168	0.664949	0.778678	0.693973	0.818605	0.686593	0.528609	0.748177	0.566203	0.553673		0.918206	0.827298	0.595937	0.873039	0.780845	0.740164	0.634532	0.777441	0.834579	0.842992	0.809977	0.74341	0.775345	0.816817	0.876891	0.86718	0.81952	0.798261	0.713408	0.776902
5.98	0.888953	0.908751	0.88249	0.791812	0.932947	0.885996	0.908741		0.455188	0.649276	0.752096	0.612107	0.765376	0.654318	0.526696	0.753161	0.510859	0.521447		0.856943	0.792612	0.585748	0.724726	0.702227	0.667726	0.629277	0.742598	0.73133	0.817726	0.722191	0.686209	0.820194	0.8996	0.900434	0.943043	0.850829	0.825942	0.795933	0.857642
6.11	0.921048	0.891803	0.864509	0.851141	0.951934	0.919385	0.842552		0.431636	0.614344	0.712418	0.535561	0.68658	0.595654	0.520049	0.762106	0.476072	0.476184		0.724233	0.741165	0.575124	0.615004	0.631714	0.586007	0.617985	0.718058	0.63128	0.786522	0.668753	0.643522	0.858002	0.888347	0.873064	0.914873	0.851473	0.872139	0.837965	0.896415
6.24	0.874351	0.85468	0.799411	0.895394	0.941253	0.870516	0.779398		0.386807	0.550011	0.684228	0.507462	0.65474	0.545471	0.507568	0.695515	0.474611	0.460781		0.610332	0.691271	0.60561	0.573381	0.607007	0.551915	0.601597	0.696497	0.556606	0.764395	0.637673	0.603084	0.873762	0.835876	0.843877	0.846025	0.83611	0.913962	0.857547	0.893268
6.37	0.8538	0.8256	0.785183	0.87097	0.906338	0.824327	0.76184		0.41044	0.56229	0.638398	0.535648	0.646342	0.527471	0.494953	0.707105	0.469302	0.475775		0.592356	0.668805	0.589399	0.596703	0.576962	0.514367	0.573759	0.691915	0.502757	0.715298	0.632104	0.588836	0.838921	0.833847	0.866986	0.812855	0.822747	0.923777	0.862945	0.865418
6.5	0.855533	0.843477	0.794783	0.860677	0.843488	0.831628	0.779931		0.400983	0.566674	0.617727	0.589675	0.639895	0.49183	0.483102	0.784762	0.45327	0.488099		0.617453	0.675768	0.567419	0.686043	0.581286	0.538165	0.581847	0.711338	0.552585	0.721699	0.61835	0.572564	0.798329	0.855513	0.875818	0.821193	0.803858	0.941194	0.888029	0.887695
6.63	0.856015	0.90377	0.82473	0.818101	0.838486	0.873858	0.858657		0.43273	0.567911	0.605822	0.674991	0.654172	0.478533	0.488755	0.821888	0.480167	0.466854		0.650805	0.66562	0.541871	0.778179	0.630115	0.580546	0.58715	0.753355	0.634578	0.738726	0.598236	0.620016	0.797845	0.887533	0.896619	0.858167	0.817055	0.906173	0.904521	0.855521
6.76	0.893228	0.90847	0.898447	0.778484	0.894098	0.922783	0.930005		0.444021	0.571114	0.627154	0.707607	0.672426	0.52308	0.5047	0.828018	0.520161	0.465256		0.716728	0.714824	0.549523	0.847379	0.709419	0.626166	0.593143	0.766863	0.741752	0.738771	0.661466	0.655301	0.779622	0.86928	0.887213	0.880792	0.864077	0.847852	0.902856	0.843573
6.89	0.891159	0.856571	0.886642	0.781506	0.937249	0.888153	0.875097		0.500756	0.600337	0.67656	0.680905	0.724978	0.558551	0.545082	0.871359	0.541135	0.490368		0.759952	0.766996	0.582749	0.845427	0.766121	0.701316	0.600572	0.792895	0.773833	0.780118	0.756577	0.661337	0.765506	0.786687	0.833141	0.871465	0.87004	0.798554	0.886117	0.83309
7.02	0.781953	0.739897	0.79955	0.737169	0.85852	0.808329	0.74458		0.566725	0.654772	0.699821	0.704104	0.786382	0.616611	0.596604	0.834814	0.600119	0.53596		0.798741	0.828017	0.605442	0.802424	0.795624	0.770232	0.606433	0.860831	0.762579	0.808237	0.859298	0.696152	0.716172	0.641473	0.751094	0.833618	0.822601	0.743422	0.834067	0.791542
7.15	0.613624	0.624671	0.703885	0.63461	0.755622	0.716615	0.606812		0.600639	0.671504	0.699269	0.734514	0.807067	0.676737	0.602456	0.813885	0.652027	0.594124		0.826021	0.845218	0.604076	0.691996	0.774157	0.835028	0.675755	0.852751	0.744699	0.805948	0.945076	0.704086	0.664582	0.524414	0.644275	0.734496	0.738365	0.702051	0.788533	0.7613
7.28	0.485885	0.493604	0.607945	0.525811	0.628175	0.575883	0.504925		0.641054	0.714505	0.725887	0.737436	0.774243	0.722691	0.681624	0.765392	0.735826	0.629531		0.801556	0.834042	0.642919	0.585619	0.669985	0.806794	0.734886	0.764833	0.723835	0.780396	0.927901	0.724506	0.585603	0.454291	0.546758	0.642253	0.627694	0.621842	0.680755	0.671198
7.41	0.402111	0.428227	0.528151	0.458322	0.51286	0.469365	0.419674		0.684819	0.75195	0.774689	0.684473	0.719736	0.764255	0.735625	0.687276	0.761511	0.629764		0.696763	0.814105	0.709176	0.44575	0.592532	0.761355	0.745589	0.644502	0.631739	0.789382	0.852663	0.701312	0.522627	0.395945	0.459382	0.558169	0.532454	0.567087	0.58477	0.545157
7.54	0.317141	0.36863	0.462565	0.364969	0.436036	0.441148	0.353314		0.712928	0.785958	0.816086	0.630079	0.645715	0.836892	0.777176	0.61708	0.77122	0.704205		0.611512	0.765819	0.77281	0.344609	0.5321	0.72429	0.78047	0.579193	0.495112	0.738988	0.74002	0.685924	0.460956	0.36377	0.395784	0.499761	0.461222	0.515284	0.492209	0.424837
7.67	0.266741	0.339538	0.406453	0.345936	0.392005	0.386413	0.343564		0.655883	0.770625	0.780536	0.551876	0.537787	0.875337	0.754548	0.593091	0.696313	0.768869		0.52839	0.655578	0.753776	0.27665	0.471096	0.632269	0.77677	0.518564	0.39199	0.659387	0.593664	0.655771	0.406753	0.330503	0.351966	0.430995	0.405047	0.451036	0.419559	0.348844
7.8	0.233643	0.30088	0.357588	0.321616	0.360074	0.353101	0.327066		0.574708	0.772392	0.733423	0.448199	0.433525	0.762263	0.777681	0.605903	0.628787	0.821717		0.450109	0.575161	0.73429	0.25295	0.41354	0.541155	0.734673	0.45445	0.339763	0.593976	0.514689	0.583658	0.35272	0.308774	0.314393	0.397006	0.357105	0.395493	0.387275	0.30083
7.93	0.216808	0.270625	0.321491	0.30189	0.321918	0.337899	0.307014		0.491197	0.778102	0.664389	0.361507	0.370195	0.676702	0.824507	0.582112	0.623855	0.791277		0.403322	0.515882	0.788195	0.220796	0.351457	0.478595	0.710722	0.410372	0.299849	0.526928	0.472536	0.485257	0.317321	0.294437	0.285666	0.368313	0.336725	0.354168	0.384609	0.267455
8.06	0.207088	0.241101	0.323204	0.27707	0.310575	0.337804	0.278208		0.464115	0.743095	0.557634	0.304228	0.329713	0.588556	0.795389	0.541524	0.532828	0.71949		0.349071	0.480493	0.778227	0.204453	0.313467	0.447065	0.715702	0.381874	0.267566	0.44873	0.432436	0.458402	0.299951	0.283184	0.262144	0.343875	0.320124	0.311266	0.364365	0.262545
8.19	0.196955	0.239413	0.293562	0.274049	0.304698	0.317513	0.27449		0.388073	0.681548	0.504543	0.269042	0.310797	0.535375	0.711571	0.467909	0.50488	0.65735		0.310879	0.44743	0.768569	0.193343	0.262077	0.391655	0.677444	0.377	0.239917	0.403499	0.40965	0.380919	0.286442	0.275363	0.236142	0.32956	0.301117	0.300825	0.341233	0.245548
8.32	0.190629	0.231045	0.274554	0.258422	0.29446	0.283482	0.27138		0.376793	0.659716	0.452487	0.24404	0.27698	0.48379	0.670856	0.415444	0.46139	0.619654		0.277807	0.403664	0.69818	0.168818	0.246854	0.375025	0.628516	0.357892	0.239876	0.375437	0.402794	0.362225	0.268441	0.266912	0.213819	0.313015	0.276413	0.293878	0.3391	0.217146
8.45	0.189184	0.212498	0.256703	0.250907	0.279184	0.271573	0.26422		0.375511	0.628996	0.434726	0.221284	0.26224	0.410877	0.676855	0.375342	0.419411	0.545565		0.287152	0.396986	0.636341	0.16859	0.23909	0.334251	0.572492	0.3312	0.231799	0.357655	0.371886	0.349333	0.26691	0.25851	0.19732	0.302977	0.264205	0.281622	0.321014	0.223065
8.58	0.185067	0.210613	0.255859	0.245385	0.25658	0.275329	0.255865		0.346861	0.589349	0.42502	0.241513	0.232542	0.351133	0.605695	0.346409	0.387043	0.474748		0.284502	0.380556	0.585683	0.170502	0.223691	0.328273	0.54728	0.340384	0.209174	0.327245	0.372016	0.335635	0.261531	0.239194	0.19019	0.277013	0.252274	0.252101	0.31422	0.203961
8.71	0.180653	0.201477	0.246027	0.230841	0.257548	0.276488	0.228975		0.346655	0.543074	0.39485	0.23848	0.201951	0.359701	0.578335	0.326302	0.360433	0.435556		0.247	0.362674	0.559356	0.179777	0.213165	0.315306	0.511771	0.360256	0.206471	0.306445	0.354119	0.294929	0.249176	0.224027	0.192018	0.277467	0.238762	0.248255	0.313833	0.206078
8.84	0.168698	0.199947	0.226923	0.214393	0.241154	0.260776	0.228457		0.315834	0.49057	0.374899	0.237271	0.20923	0.342105	0.52268	0.331909	0.342125	0.392244		0.229641	0.34563	0.491563	0.164734	0.210776	0.310345	0.46468	0.317246	0.201236	0.317212	0.332396	0.292705	0.24671	0.231043	0.184739	0.264955	0.226286	0.244381	0.298121	0.191978
8.97	0.150254	0.179724	0.219997	0.219059	0.216272	0.240425	0.203097		0.320666	0.456011	0.359383	0.229416	0.190316	0.309903	0.472096	0.345281	0.347284	0.358934		0.224836	0.326767	0.465149	0.175223	0.204577	0.280776	0.429465	0.306254	0.192189	0.3043	0.320827	0.304461	0.248813	0.233208	0.170102	0.256226	0.213147	0.228651	0.275679	0.184132
9.1	0.146944	0.179091	0.216626	0.214353	0.212344	0.258717	0.211097		0.320045	0.397881	0.317129	0.210626	0.177297	0.338412	0.479642	0.335769	0.330033	0.353527		0.221364	0.33366	0.427238	0.168813	0.201159	0.2618	0.41198	0.285652	0.202127	0.293542	0.294954	0.280269	0.235033	0.207469	0.160936	0.239105	0.211714	0.216998	0.268087	0.17866
9.23	0.151754	0.187897	0.196479	0.209596	0.206146	0.244576	0.202082		0.301228	0.383325	0.29303	0.234264	0.179597	0.345772	0.449724	0.338926	0.327471	0.328313		0.212714	0.32817	0.399602	0.170489	0.208933	0.266216	0.399076	0.275228	0.18345	0.273924	0.306249	0.270705	0.234302	0.217381	0.145919	0.23099	0.196434	0.218951	0.249992	0.16466
9.36	0.134719	0.185367	0.188705	0.199503	0.198444	0.220098	0.209818		0.290297	0.351298	0.295871	0.230374	0.163226	0.359462	0.412826	0.327899	0.314732	0.325461		0.205903	0.30716	0.382696	0.180211	0.185617	0.252709	0.383852	0.281424	0.17297	0.251165	0.302013	0.263188	0.214326	0.212775	0.145486	0.220929	0.185871	0.22072	0.242385	0.162227
9.49	0.128845	0.167451	0.191695	0.211804	0.191729	0.226128	0.194276		0.319792	0.329421	0.303019	0.233532	0.169484	0.351706	0.381523	0.332688	0.312918	0.323509		0.217517	0.293477	0.360162	0.181602	0.180689	0.235226	0.371157	0.274673	0.190417	0.27546	0.296493	0.249946	0.209121	0.194989	0.129354	0.209967	0.181932	0.211178	0.245561	0.151693
9.62	0.129349	0.180811	0.187283	0.194279	0.187908	0.214876	0.201318		0.27573	0.326428	0.300938	0.224724	0.159619	0.342145	0.392307	0.317261	0.303753	0.319933		0.210952	0.279522	0.364321	0.172941	0.175122	0.234632	0.34826	0.27783	0.191047	0.260091	0.284357	0.233665	0.201755	0.215996	0.133474	0.207812	0.175466	0.196632	0.248207	0.14468
9.75	0.131941	0.180159	0.17409	0.183511	0.19149	0.21526	0.183625		0.29075	0.303002	0.26989	0.220889	0.145948	0.344014	0.364075	0.298986	0.316253	0.313102		0.206526	0.274593	0.345676	0.160458	0.184365	0.234514	0.312695	0.260591	0.182333	0.240951	0.264843	0.24334	0.197194	0.203422	0.129966	0.196763	0.161061	0.19111	0.24446	0.143768
9.88	0.126312	0.173104	0.166685	0.182144	0.179094	0.209189	0.185472		0.292932	0.295116	0.250983	0.243559	0.14343	0.322603	0.349689	0.309569	0.297937	0.317005		0.202564	0.266999	0.328647	0.16281	0.181846	0.240595	0.333494	0.265745	0.189467	0.226906	0.27902	0.247325	0.188389	0.201945	0.114	0.193625	0.159316	0.189026	0.228042	0.154626
10.01	0.128982	0.174093	0.160433	0.186153	0.168106	0.22145	0.176201		0.29804	0.289416	0.243141	0.231952	0.144247	0.325667	0.33857	0.308441	0.28222	0.310886		0.199707	0.249757	0.329177	0.156996	0.170594	0.223765	0.333295	0.259479	0.191251	0.242785	0.276129	0.253468	0.179677	0.19676	0.112266	0.19252	0.149397	0.189746	0.219972	0.148625
10.14	0.128865	0.155769	0.163119	0.179286	0.158005	0.203774	0.159554		0.301953	0.267781	0.235441	0.22903	0.138699	0.335496	0.332083	0.299543	0.286834	0.288898		0.202929	0.238853	0.312103	0.155564	0.16446	0.233836	0.316062	0.260599	0.192322	0.238509	0.260672	0.234603	0.179363	0.191568	0.112962	0.192247	0.138215	0.186869	0.225381	0.130083
10.27	0.131847	0.170752	0.151636	0.183642	0.156971	0.206244	0.169249		0.302858	0.279474	0.230728	0.205546	0.129178	0.365576	0.295549	0.293748	0.263732	0.279817		0.204914	0.24307	0.325618	0.163356	0.169736	0.21757	0.33318	0.252484	0.194433	0.245351	0.259271	0.239722	0.168529	0.184516	0.107374	0.174097	0.127983	0.181051	0.230325	0.132362
10.4	0.122115	0.167482	0.149581	0.173668	0.157665	0.213406	0.177792		0.27688	0.27242	0.235595	0.198947	0.137544	0.33428	0.285583	0.279352	0.284117	0.283645		0.213301	0.261155	0.300149	0.149716	0.166495	0.220882	0.321001	0.251226	0.178275	0.229319	0.245855	0.235107	0.168501	0.193239	0.105001	0.164601	0.130836	0.163204	0.222522	0.132547
10.53	0.113706	0.168903	0.144221	0.169371	0.15194	0.200698	0.150434		0.29406	0.261347	0.231288	0.217306	0.149732	0.31668	0.288985	0.300584	0.277389	0.265311		0.195409	0.238192	0.29533	0.156787	0.171948	0.195247	0.311912	0.263277	0.184052	0.242389	0.243935	0.234944	0.18039	0.187933	0.100107	0.153635	0.123565	0.18511	0.219664	0.13436
10.66	0.118809	0.165865	0.151404	0.170814	0.150718	0.203649	0.159096		0.317469	0.244785	0.228979	0.2101	0.140821	0.315575	0.309166	0.308393	0.27496	0.243787		0.212848	0.237598	0.304492	0.155514	0.170626	0.19428	0.308825	0.242571	0.195892	0.22963	0.264837	0.219863	0.159125	0.19692	0.0934759	0.154378	0.127696	0.167915	0.20508	0.126541
10.79	0.121502	0.161886	0.14344	0.182775	0.139165	0.202371	0.160705		0.30919	0.267863	0.224533	0.220996	0.130398	0.338146	0.325146	0.293333	0.286373	0.248138		0.196529	0.214827	0.301238	0.158716	0.158965	0.196708	0.319095	0.254444	0.190049	0.225109	0.253097	0.22877	0.157155	0.194291	0.0908822	0.16477	0.127495	0.165674	0.223437	0.117968
10.92	0.115271	0.152466	0.142899	0.171688	0.151965	0.196335	0.149033		0.31585	0.250084	0.216294	0.23581	0.134109	0.347512	0.29599	0.295368	0.270128	0.254601		0.204248	0.208686	0.301364	0.163094	0.170293	0.196507	0.307492	0.273431	0.202059	0.229089	0.246403	0.248439	0.167789	0.186705	0.0966735	0.159001	0.122431	0.170548	0.227193	0.120941
11.05	0.124619	0.156169	0.142914	0.164214	0.133278	0.198064	0.133548		0.347921	0.249889	0.214466	0.230447	0.132857	0.327271	0.300874	0.288655	0.251025	0.253006		0.201401	0.216858	0.34083	0.178147	0.16495	0.193642	0.318425	0.25885	0.183938	0.232752	0.268903	0.241844	0.161716	0.172415	0.0935761	0.148669	0.110639	0.163362	0.19201	0.139475
11.18	0.117365	0.158156	0.133406	0.162438	0.134618	0.195894	0.144567		0.301754	0.245194	0.221617	0.235201	0.118918	0.322837	0.301571	0.305317	0.260965	0.267304		0.209456	0.210745	0.319042	0.173514	0.160655	0.197918	0.33008	0.263613	0.183966	0.216029	0.253506	0.229872	0.168335	0.184107	0.0901101	0.143414	0.107368	0.165869	0.203561	0.137416
11.31	0.105854	0.162531	0.122702	0.151318	0.133771	0.198559	0.141388		0.299027	0.248284	0.21324	0.247865	0.133351	0.335325	0.316532	0.291628	0.262801	0.256678		0.207975	0.200904	0.285867	0.169538	0.140871	0.17702	0.315391	0.261724	0.20616	0.239402	0.266024	0.218019	0.157845	0.185685	0.0925356	0.138454	0.101907	0.161067	0.213417	0.123369
11.44	0.121538	0.155296	0.126981	0.154786	0.129664	0.188152	0.132837		0.28759	0.247615	0.210197	0.216659	0.130139	0.336433	0.299189	0.279655	0.260335	0.257851		0.193984	0.203854	0.307781	0.1779	0.159718	0.182431	0.319612	0.257332	0.203181	0.242433	0.250209	0.246871	0.151385	0.186341	0.0921466	0.145828	0.103243	0.168958	0.222345	0.121051
11.57	0.110973	0.15876	0.140217	0.173321	0.129621	0.199994	0.134297		0.308184	0.235374	0.208138	0.240689	0.127103	0.333735	0.301583	0.282387	0.245205	0.271148		0.194121	0.201611	0.288162	0.185394	0.168419	0.195429	0.294803	0.26675	0.201647	0.230694	0.251331	0.254145	0.144989	0.18987	0.0853303	0.147006	0.105936	0.174823	0.193393	0.128263
11.7	0.116607	0.149587	0.130154	0.169229	0.128742	0.191149	0.152219		0.322847	0.215299	0.21185	0.227342	0.128732	0.356669	0.313044	0.284973	0.252827	0.240924		0.191524	0.205258	0.302459	0.171577	0.161593	0.185551	0.288387	0.280855	0.192676	0.244779	0.233327	0.251239	0.160249	0.202771	0.0930917	0.139228	0.105418	0.166234	0.211889	0.121369
11.83	0.115534	0.143044	0.129361	0.163562	0.123424	0.202053	0.144729		0.284498	0.222644	0.217027	0.251148	0.132023	0.342575	0.301748	0.290048	0.247258	0.242625		0.187598	0.195912	0.281873	0.179517	0.160683	0.185424	0.303369	0.264731	0.200895	0.238771	0.235582	0.237261	0.150507	0.192388	0.0905206	0.145441	0.10372	0.179921	0.201781	0.1206
11.96	0.111291	0.135646	0.13407	0.163915	0.125171	0.195424	0.162876		0.30097	0.217195	0.233287	0.265036	0.13521	0.352483	0.322278	0.274374	0.245377	0.245293		0.191767	0.199054	0.281736	0.170619	0.163247	0.188659	0.314967	0.269334	0.199607	0.210291	0.24555	0.254704	0.144512	0.187379	0.0916484	0.134882	0.0992214	0.163714	0.212615	0.128638
12.09	0.108021	0.148362	0.124538	0.149499	0.128711	0.190758	0.150113		0.293731	0.236181	0.219015	0.252876	0.124273	0.331304	0.319699	0.284894	0.256601	0.230024		0.198457	0.179485	0.292872	0.165567	0.148559	0.193131	0.302642	0.247486	0.205753	0.210693	0.23263	0.246362	0.155333	0.216202	0.0919883	0.133662	0.104155	0.164962	0.221508	0.123011
12.22	0.101881	0.142603	0.12978	0.166828	0.11702	0.19333	0.145638		0.331012	0.245966	0.20982	0.231909	0.125975	0.34198	0.295142	0.2823	0.243808	0.231805		0.195182	0.17327	0.289118	0.170585	0.150327	0.186789	0.296349	0.270599	0.208564	0.226128	0.252154	0.239515	0.150871	0.222953	0.091822	0.135533	0.0958994	0.166605	0.243916	0.121692
12.35	0.107372	0.145676	0.125719	0.170078	0.112417	0.20078	0.142995		0.312997	0.23828	0.227791	0.242041	0.123427	0.345425	0.315245	0.277164	0.259928	0.234371		0.196861	0.170019	0.26901	0.173514	0.153743	0.184827	0.28915	0.247454	0.209295	0.222057	0.25155	0.264102	0.153325	0.197952	0.094755	0.125153	0.0900366	0.169575	0.220863	0.118046
12.48	0.0999534	0.148755	0.123825	0.156675	0.119405	0.195629	0.137		0.300119	0.235747	0.211959	0.235165	0.128251	0.327832	0.273278	0.276536	0.266519	0.239446		0.199253	0.185101	0.270669	0.179148	0.150661	0.179137	0.294665	0.240935	0.208841	0.227392	0.23846	0.270804	0.153889	0.200556	0.0917643	0.130774	0.0963625	0.161776	0.215479	0.120681
12.61	0.105468	0.159991	0.126466	0.160656	0.111179	0.180833	0.155451		0.307169	0.23718	0.225945	0.238595	0.124641	0.331242	0.279564	0.270836	0.251239	0.239582		0.213495	0.181704	0.295478	0.183664	0.142626	0.18549	0.271518	0.244633	0.210902	0.259093	0.23192	0.2654	0.158214	0.205727	0.0904489	0.125489	0.0948362	0.162191	0.223829	0.12209
12.74	0.112804	0.159391	0.12138	0.167705	0.118312	0.187237	0.132273		0.299037	0.241187	0.210058	0.242114	0.120277	0.306912	0.259685	0.257847	0.267913	0.260471		0.21183	0.190022	0.293038	0.177925	0.146129	0.198712	0.266418	0.232291	0.219987	0.248772	0.26246	0.248448	0.151365	0.210801	0.0881795	0.121478	0.0978607	0.150345	0.223593	0.11818
																																0.127101	0.230524	0.0957674	0.100603	0.0896172	0.140675	0.220016	0.12374

## Sheet: Relative Mean Intensity
Time (min)	TEV Buffer											TEV														ICRF														TEV+ICRF
2	1	1	1	1	1	1	1	1	1	1		1	1	1	1	1	1	1	1	1	1	1	1	1		1	1	1	1	1	1	1	1	1	1	1	1	1		1	1	1	1	1	1	1	1	1	1
4	1.06219	1.03784	1.03669	0.997819	1.00727	1.02788	1.08473	0.991859	1.02756	1.02498		1.13202	1.08976	1.01812	1.11363	1.08237	0.993179	0.986025	1.09991	1.02212	1.05728	1.04483	1.03601	1.12036		0.951144	0.993455	1.03325	1.03099	1.02724	1.02644	0.992212	1.00727	1.0152	0.99674	1.03084	1.00263	1.04889		1.02778	0.993778	1.02276	0.95466	1.05011	1.06074	0.955871	0.99889	0.981803	1.00914
6	1.12602	1.04633	1.06947	0.993072	1.02296	1.02272	1.13405	0.991741	1.04788	1.03669		1.28216	1.21008	1.05068	1.23819	1.14806	1.01143	1.01032	1.19882	1.09611	1.12519	1.08466	1.14363	1.21949		0.892569	0.983394	1.05304	0.999918	1.02482	1.02234	0.994779	0.985846	1.01357	0.918626	1.01952	0.992613	1.0688		1.01879	0.942943	0.983765	0.885164	1.0538	1.09661	0.884279	0.975798	0.93745	0.992419
8	1.17944	1.06743	1.09405	0.996618	1.01888	1.03839	1.18887	0.992406	1.05232	1.06492		1.38129	1.3054	1.06401	1.31852	1.15754	1.01983	1.01785	1.28445	1.14288	1.20949	1.11246	1.21623	1.29709		0.897188	0.972544	1.057	0.957592	0.986689	1.0043	0.968841	0.958412	0.999571	0.88561	0.966785	0.948014	1.0653		0.982552	0.910225	0.942583	0.83304	1.02939	1.0834	0.84941	0.935321	0.871991	0.968316
10	1.22218	1.08706	1.11569	0.996183	1.00736	1.02161	1.21988	0.979795	1.02698	1.06213		1.45162	1.37686	1.08329		1.16914	1.02685	1.01802		1.16881	1.258	1.1425	1.26554	1.35448		0.951051	0.963024	1.03147	0.91559	0.943128	0.994701	0.969094	0.919726	0.977054	0.848182	0.950481	0.899732	1.04837		0.952267	0.881636	0.93853	0.806289	1.00946	1.06764	0.836645	0.913044	0.815222	0.94829
12	1.23133	1.07746	1.13434	0.993505	0.987564	1.03391	1.23928	0.986862	1.02448	1.06835		1.50282	1.41516	1.10276		1.17463	1.03382			1.18869	1.27174	1.16261	1.3014	1.38427		0.965874	0.959267	0.976017	0.876485	0.940707	0.9809	0.93763	0.884813	0.950132	0.830947	0.929142	0.868243	1.03778		0.902667	0.845604	0.944139	0.820443	0.994217	1.06088	0.853841	0.898273	0.779645	0.929582
14	1.3239	1.08862	1.13445	1.00358	0.985185	1.02166	1.24342	0.998591	1.02279			1.54134	1.4035	1.11838						1.20215	1.25703	1.16806	1.34066	1.41721		0.967339		0.952824	0.863963	0.920106		0.920744	0.857239	0.931153	0.785054	0.91979	0.840514	1.04188							1.07413	0.872129		0.75841	0.923834
[truncated: 5 more columns]

## Sheet: Relative Volume
Time (min)	TEV Buffer											TEV														ICRF														TEV+ICRF
2	1	1	1	1	1	1	1	1	1	1		1	1	1	1	1	1	1	1	1	1	1	1	1		1	1	1	1	1	1	1	1	1	1	1	1	1		1	1	1	1	1	1	1	1	1	1
4	1.02888	1.08918	1.03026	0.999598	1.03299	1.01352	1.0018	1.01563	1.02806	0.983025		0.947558	0.956355	0.991835	0.963253	0.94979	0.984573	1.01575	1.00069	0.976517	1.0388	0.989036	0.965808	1.02019		0.942433	1.00191	1.02663	1.00929	1.0211	1.01768	1.02597	0.995465	0.993792	1.0337	1.0234	1.02516	1.02998		0.989406	1.03113	1.17016	1.01025	0.991343	1.05004	1.04284	1.02176	0.998118	1.01512
6	1.02061	1.09608	1.04414	1.00215	1.01646	1.0181	1.00012	1.00497	1.01861	0.950072		0.889799	0.889456	0.990361	0.903533	0.90361	0.950799	0.982908	0.95479	0.960508	1.01835	0.980626	0.953746	1.00233		0.845851	0.998741	1.03623	1.04168	0.988765	1.03283	1.02554	1.03747	1.00511	1.082	1.07257	1.03432	1.04183		1.01355	1.04498	1.1746	1.04106	1.01562	1.11453	1.11456	1.07331	1.04167	1.01942
8	1.02021	1.08793	1.03592	0.999229	0.997129	1.01443	1.00272	1.0006	1.01351	0.925225		0.846855	0.830892	0.982343	0.870219	0.883697	0.923391	0.951507	0.891497	0.920828	0.96586	0.978658	0.888702	0.981135		0.902576	0.995009	1.05492	1.06376	0.983481	1.03017	1.05262	1.05998	1.00395	1.14887	1.13078	1.07037	1.05616		1.04	0.987498	1.0317	1.0093	1.0613	1.17894	1.12728	1.10126	1.08073	1.03042
10	0.98107	1.09639	1.03393	0.995676	0.98317	0.94725	0.99911	1.00716	1.0015	0.895843		0.814319	0.793696	0.979749		0.863411	0.909771	0.890989		0.898972	0.946487	0.967484	0.900848	0.973821		1.00595	0.984028	1.08921	1.10183	0.989949	1.02649	1.04084	1.09646	1.04388	1.16515	1.17233	1.10384	1.1115		1.058	0.946347	0.987164	1.02249	1.09788	1.23287	1.12492	1.10691	1.09974	1.03381
12	0.964849	1.04337	1.03287	0.997185	0.967405	1.00559	0.983553	1.00197	1.00114	0.888917		0.789165	0.779467	0.97291		0.841088	0.915803			0.876526	0.940468	0.955278	0.877236	0.966087		1.03262	0.97665	1.10986	1.12474	0.999423	1.04481	1.05409	1.06842	1.06735	1.19702	1.20723	1.08132	1.10579		1.08311	0.801376	1.10728	0.987311	1.11511	1.27235	1.10131	1.09512	1.10057	1.03813
14	0.975483	1.04789	1.03773	0.994838	0.974137	1.01683	0.982062	0.985584	0.942513			0.771551	0.770812	0.96448						0.854718	0.925895	0.953638	0.85916	0.9557		1.03758		1.13817	1.12397	1.00926		1.05789	1.04436	1.06227	1.22273	1.23618	1.02511	1.14967							1.28739	1.07194		1.08008	1.03075
[truncated: 5 more columns]

## Sheet: Relative Surface Area
Time (min)	TEV Buffer											TEV														ICRF														TEV+ICRF
2	1	1	1	1	1	1	1	1	1	1		1	1	1	1	1	1	1	1	1	1	1	1	1		1	1	1	1	1	1	1	1	1	1	1	1	1		1	1	1	1	1	1	1	1	1	1
4	0.987235	1.10755	1.02537	1.00948	1.06166	1.03777	1.00184	1.02059	1.02655	0.96699		0.913778	0.947632	0.980947	0.95077	0.940609	0.992611	1.00645	0.972818	0.964647	1.03459	0.985274	0.946374	0.97222		0.977187	1.00354	1.02326	1.00769	1.02893	1.02917	1.03585	0.998427	0.99456	1.02002	1.02274	1.03731	1.02622		0.977805	1.00915	1.15571	1.02037	0.989805	1.02165	1.05334	1.01319	0.99132	1.01353
6	0.950374	1.12149	1.03725	1.01924	1.02135	1.05786	0.991152	1.02673	1.01477	0.940239		0.824913	0.861179	0.950986	0.875188	0.887889	0.951255	0.949613	0.903512	0.928115	0.996759	0.967947	0.911701	0.916686		0.893839	1.00308	1.03342	1.03981	1.02141	1.04726	1.0326	1.05682	1.00871	1.06133	1.06823	1.05381	1.03343		1.00172	1.03763	1.17574	1.07053	1.01193	1.05091	1.12187	1.05468	1.0306	1.02811
8	0.944105	1.10824	1.03125	1.03133	1.00025	1.06415	0.983519	1.04047	1.01042	0.911155		0.764525	0.794868	0.926733	0.821392	0.869506	0.927548	0.913624	0.843023	0.87541	0.922994	0.957632	0.837565	0.873615		0.951023	1.01527	1.05149	1.07424	1.03957	1.04956	1.07406	1.0804	1.0036	1.13564	1.11532	1.10919	1.05786		1.01399	0.978872	1.05321	1.04847	1.04984	1.10014	1.13373	1.09	1.06587	1.02731
10	0.896008	1.11252	1.03163	1.03051	0.987719	1.00058	0.974894	1.05303	1.009	0.886039		0.731303	0.754441	0.919096		0.851182	0.908089	0.858212		0.844387	0.901695	0.947036	0.837132	0.851361		1.02876	1.03503	1.08343	1.12387	1.07216	1.05209	1.05422	1.15747	1.04456	1.15776	1.17004	1.15758	1.12858		1.02874	0.955009	1.04804	1.05581	1.07554	1.14104	1.12287	1.10034	1.08381	1.03133
12	0.864723	1.06468	1.02422	1.04116	0.974946	1.05967	0.9581	1.05357	1.011	0.876859		0.70359	0.731468	0.915949		0.834798	0.917467			0.82568	0.895102	0.935251	0.80585	0.838422		1.05984	1.04334	1.10324	1.14687	1.07346	1.07291	1.0913	1.172	1.07868	1.20401	1.20085	1.17284	1.13958		1.05132	0.817635	1.13525	1.00582	1.08856	1.17996	1.10015	1.09879	1.08792	1.03447
14	0.884736	1.06774	1.02245	1.05345	0.971856	1.0805	0.953097	1.04289	0.955181			0.686272	0.726574	0.908374						0.801741	0.875054	0.930937	0.785381	0.819713		1.07492		1.14612	1.16706	1.11434		1.10755	1.21239	1.08355	1.28818	1.23757	1.12889	1.18372							1.20385	1.06316		1.09801	1.01864
[truncated: 5 more columns]
