# Supplementary material for: Metaphase chromosome structure is dynamically maintained by condensin I-directed DNA (de)catenation
Source: eLife. 2017 May 6;6:e26120. doi: 10.7554/eLife.26120 (PMC5451211; doi:10.7554/eLife.26120)
Supplement: Figure 4—source data 1. — Individual measurements of segregation efficiency (Figure 4a) and chromosome displacement (Figure 4c.) Each data set is presented on a separate sheet. DOI: http://dx.doi.org/10.7554/eLife.26120.016 [file elife-26120-fig4-data1.xlsx]

## Sheet: Segregation Efficiency
Distance	Rad21TEV									Rad21TEV BarrenTEV
0.13	0.13531	0.0710133	0.0693434	0.0840552	0.09823	0.105078	0.0765788	0.0645408		0.0782712	0.066925	0.0846827	0.128763	0.0723585	0.0709499	0.101609	0.110879
0.26	0.132931	0.0701935	0.0697503	0.0876052	0.109322	0.110581	0.0729885	0.0604546		0.0713081	0.0662372	0.0849078	0.134317	0.0746002	0.0722458	0.103108	0.115019
0.39	0.140054	0.0726144	0.073848	0.084679	0.0993768	0.108265	0.0817887	0.0636301		0.0774186	0.0643172	0.0851123	0.127137	0.0698493	0.0745292	0.100749	0.119499
0.52	0.149645	0.0671423	0.0684713	0.0840688	0.0990736	0.108865	0.0844868	0.0599038		0.0769889	0.0703792	0.0906536	0.125528	0.0704307	0.0756082	0.108385	0.112465
0.65	0.140961	0.0722627	0.0718498	0.0822139	0.0937992	0.111725	0.0885085	0.0578519		0.0821255	0.0767181	0.090191	0.125724	0.0717594	0.072371	0.117405	0.125851
0.78	0.140226	0.0732523	0.0741956	0.0880071	0.0998662	0.102998	0.0828647	0.0611745		0.0822961	0.0763213	0.0911728	0.136211	0.0704527	0.0759368	0.116791	0.115551
0.91	0.144496	0.0776257	0.0754103	0.0834378	0.103145	0.100333	0.0812846	0.0643039		0.0826886	0.0767721	0.0935047	0.124284	0.0756324	0.0750648	0.120087	0.121526
1.04	0.158958	0.0753745	0.081429	0.0865675	0.111944	0.101761	0.0868403	0.0691615		0.0882249	0.0852782	0.0945565	0.12192	0.076692	0.0694117	0.126019	0.12316
1.17	0.158394	0.075344	0.0819922	0.0824423	0.108833	0.112403	0.0888888	0.0609276		0.0903706	0.0875392	0.0949654	0.130138	0.0794125	0.0685995	0.13892	0.124655
1.3	0.157029	0.0739575	0.0846284	0.0825351	0.100203	0.110183	0.0951525	0.0721067		0.0896511	0.0889091	0.0895083	0.126101	0.0800417	0.0717224	0.151007	0.134973
1.43	0.162774	0.0785363	0.0834756	0.0867404	0.105538	0.110105	0.102661	0.0778388		0.0932688	0.0979266	0.0991767	0.125705	0.0809557	0.0802473	0.165278	0.123434
1.56	0.175229	0.0818803	0.08788	0.0903394	0.111472	0.117886	0.101482	0.0746346		0.0921545	0.103853	0.10526	0.12355	0.0908917	0.0811827	0.194484	0.11741
1.69	0.170889	0.078244	0.0971336	0.0969421	0.111492	0.124393	0.107249	0.0700476		0.100448	0.112599	0.107952	0.132843	0.0978657	0.07983	0.21416	0.115106
1.82	0.18747	0.0819335	0.102019	0.0994084	0.110918	0.128805	0.121842	0.0739512		0.100601	0.118353	0.10231	0.129373	0.103703	0.0850293	0.245874	0.126015
1.95	0.192735	0.0830753	0.119244	0.103012	0.110311	0.12462	0.126871	0.0748734		0.111836	0.121221	0.102188	0.128873	0.110098	0.0871398	0.282207	0.135338
2.08	0.212369	0.0814694	0.136909	0.10875	0.12306	0.129451	0.134149	0.0817684		0.11653	0.130047	0.111183	0.131716	0.11293	0.0905673	0.340919	0.15066
2.21	0.241892	0.0898006	0.157896	0.113104	0.125972	0.141407	0.159763	0.0905598		0.123752	0.136819	0.112556	0.140071	0.126653	0.0928962	0.404585	0.137897
2.34	0.252241	0.0951693	0.181485	0.118418	0.126583	0.152115	0.177425	0.0960038		0.136169	0.149527	0.111937	0.142439	0.139562	0.109334	0.445761	0.142373
2.47	0.283226	0.0991164	0.206321	0.125116	0.135661	0.176133	0.190744	0.105185		0.152573	0.165821	0.11807	0.140379	0.158144	0.112048	0.496082	0.15412
2.6	0.320672	0.106028	0.242199	0.127212	0.140874	0.210077	0.210299	0.116403		0.169601	0.186411	0.133232	0.145171	0.179782	0.128013	0.562219	0.157374
2.73	0.362101	0.120374	0.276097	0.14119	0.150125	0.242006	0.23337	0.138204		0.202373	0.199065	0.134539	0.140308	0.213802	0.144227	0.594895	0.170576
2.86	0.404205	0.129542	0.32084	0.152259	0.165928	0.30345	0.263419	0.15967		0.226855	0.224919	0.145379	0.153371	0.248564	0.160032	0.649519	0.179053
2.99	0.46033	0.142287	0.37716	0.163466	0.185484	0.375813	0.296478	0.183408		0.267092	0.247588	0.160634	0.155289	0.284769	0.189414	0.700693	0.177515
3.12	0.501662	0.165569	0.427546	0.18223	0.202973	0.442914	0.329502	0.21629		0.303791	0.282522	0.173619	0.156041	0.323434	0.233823	0.741065	0.206717
3.25	0.561932	0.194763	0.4866	0.210332	0.231529	0.511859	0.366058	0.250033		0.340928	0.305021	0.194784	0.168069	0.366342	0.287985	0.77529	0.248173
3.38	0.621372	0.226766	0.54313	0.243573	0.254991	0.578058	0.407723	0.30322		0.38295	0.343	0.216193	0.167119	0.417864	0.339197	0.812117	0.276457
3.51	0.657016	0.270479	0.602889	0.285255	0.291711	0.648653	0.454847	0.358958		0.445289	0.37897	0.246888	0.171277	0.473566	0.397717	0.829597	0.309166
3.64	0.7132	0.309947	0.669675	0.340389	0.318754	0.700187	0.513734	0.421889		0.499709	0.423876	0.268265	0.189906	0.52419	0.450322	0.844226	0.333233
3.77	0.752977	0.354694	0.717639	0.399049	0.358092	0.748084	0.57519	0.493672		0.552637	0.480299	0.306506	0.197913	0.575516	0.503859	0.851068	0.367459
3.9	0.788806	0.40746	0.764349	0.454497	0.397403	0.791836	0.608323	0.594374		0.586849	0.528965	0.357158	0.224077	0.630983	0.558587	0.83493	0.414339
4.03	0.81386	0.462561	0.80764	0.520747	0.447838	0.830897	0.655231	0.671103		0.627028	0.583154	0.41181	0.242475	0.68598	0.624852	0.792392	0.444668
4.16	0.840138	0.524787	0.835064	0.59136	0.497322	0.858408	0.699654	0.739024		0.665542	0.632742	0.453334	0.25208	0.726706	0.681342	0.794175	0.474786
4.29	0.848643	0.588947	0.858595	0.650113	0.544454	0.877846	0.73389	0.807577		0.709214	0.674695	0.495645	0.275496	0.767043	0.743079	0.747989	0.518076
4.42	0.843064	0.645725	0.880446	0.699125	0.583885	0.89942	0.766521	0.848275		0.73047	0.72598	0.539687	0.307537	0.793613	0.790816	0.709233	0.576707
4.55	0.837378	0.7055	0.897289	0.756852	0.618785	0.896167	0.774482	0.89146		0.745283	0.784575	0.59189	0.350652	0.808179	0.825837	0.642259	0.640218
4.68	0.826353	0.746501	0.913724	0.805362	0.652419	0.902701	0.766902	0.90699		0.766167	0.81425	0.629413	0.392513	0.832986	0.854236	0.583299	0.667442
4.81	0.818485	0.787256	0.914086	0.855561	0.672355	0.898302	0.763008	0.91048		0.78028	0.846544	0.662798	0.433515	0.847891	0.87777	0.554742	0.737027
4.94	0.793779	0.818803	0.908935	0.887511	0.681334	0.877137	0.769904	0.910551		0.780108	0.872661	0.703222	0.47787	0.854248	0.881659	0.496566	0.768979
5.07	0.786483	0.845676	0.894069	0.911998	0.711715	0.854268	0.788654	0.921055		0.795601	0.889957	0.733319	0.514856	0.851637	0.88008	0.461519	0.783577
5.2	0.76356	0.862511	0.872089	0.921845	0.727376	0.82422	0.813173	0.911777		0.802034	0.903194	0.764445	0.554948	0.84275	0.877321	0.430346	0.812384
5.33	0.72517	0.872398	0.828787	0.916811	0.743311	0.797359	0.815665	0.891354		0.790862	0.89653	0.7899	0.599476	0.828762	0.870268	0.402911	0.837953
5.46	0.678749	0.874323	0.781933	0.914906	0.753229	0.761117	0.820046	0.871941		0.78012	0.894772	0.801641	0.648777	0.804273	0.839069	0.369247	0.864607
5.59	0.643246	0.867284	0.716017	0.912026	0.753373	0.701039	0.8169	0.859052		0.76176	0.873039	0.815604	0.672319	0.785035	0.824282	0.344333	0.872641
5.72	0.617566	0.863228	0.657347	0.891322	0.754563	0.651148	0.801394	0.814758		0.742461	0.861837	0.823419	0.698132	0.761179	0.77707	0.325931	0.880742
5.85	0.583547	0.85346	0.601314	0.868215	0.760295	0.586128	0.796381	0.782162		0.717179	0.847185	0.814661	0.725921	0.746664	0.758644	0.294084	0.876724
5.98	0.557973	0.8419	0.555274	0.845909	0.754319	0.525085	0.773062	0.716359		0.684621	0.818883	0.814579	0.760095	0.725983	0.724931	0.28082	0.867287
6.11	0.518882	0.823726	0.510543	0.823837	0.742475	0.47403	0.760121	0.647406		0.657036	0.792992	0.805503	0.781378	0.692493	0.694029	0.271162	0.869098
6.24	0.477728	0.826434	0.470666	0.797395	0.732338	0.424178	0.724737	0.574273		0.635467	0.769535	0.783244	0.794285	0.655419	0.65376	0.262856	0.85833
6.37	0.445038	0.809215	0.428176	0.778251	0.711808	0.395292	0.705939	0.504356		0.604498	0.742416	0.766171	0.78795	0.611206	0.611675	0.239986	0.836823
6.5	0.411504	0.775507	0.405572	0.735316	0.686406	0.357745	0.678994	0.448684		0.581643	0.715751	0.734664	0.792095	0.570788	0.561072	0.22756	0.819826
6.63	0.39863	0.753284	0.373262	0.714819	0.675861	0.330865	0.679308	0.392814		0.543219	0.681025	0.72474	0.796865	0.529095	0.511463	0.210762	0.797961
6.76	0.369814	0.720299	0.338774	0.690967	0.651529	0.304953	0.691214	0.362196		0.515093	0.645885	0.705917	0.807674	0.492383	0.477803	0.205318	0.727966
6.89	0.351128	0.692011	0.308036	0.684992	0.63833	0.27199	0.687988	0.33996		0.491731	0.613781	0.698804	0.807895	0.465007	0.435183	0.195121	0.699296
7.02	0.334883	0.681091	0.283365	0.667363	0.635997	0.250928	0.693955	0.336527		0.479855	0.588168	0.674877	0.813034	0.438555	0.396458	0.197933	0.684196
7.15	0.312565	0.658826	0.274095	0.651159	0.637747	0.241259	0.706032	0.31273		0.463253	0.564527	0.679006	0.819385	0.421824	0.383173	0.172762	0.66681
7.28	0.301039	0.645601	0.259466	0.633789	0.624507	0.237315	0.706828	0.291647		0.461929	0.55474	0.668174	0.813729	0.410762	0.371963	0.174459	0.650988
7.41	0.29849	0.630097	0.245472	0.618299	0.616163	0.231358	0.707833	0.278418		0.459144	0.554837	0.670141	0.8259	0.405597	0.367126	0.171071	0.640826
7.54	0.297744	0.627299	0.24351	0.603886	0.592617	0.23771	0.700823	0.284665		0.464204	0.561733	0.681004	0.840241	0.401453	0.36788	0.170445	0.629208
7.67	0.30478	0.626139	0.254586	0.608517	0.587802	0.228221	0.702744	0.286891		0.48111	0.571302	0.699998	0.837442	0.40546	0.368797	0.179469	0.639325
7.8	0.292485	0.630431	0.261302	0.613648	0.59959	0.236375	0.703475	0.294777		0.507259	0.58436	0.713759	0.833005	0.416662	0.366713	0.178866	0.649041
7.93	0.322478	0.654895	0.26296	0.620641	0.592328	0.239771	0.705635	0.307123		0.543614	0.60318	0.734162	0.846228	0.423441	0.371121	0.166165	0.642466
8.06	0.327271	0.676438	0.268761	0.650415	0.606704	0.24578	0.695456	0.317509		0.579174	0.621226	0.762386	0.855163	0.43529	0.376526	0.169621	0.628814
8.19	0.355449	0.689282	0.280453	0.671868	0.612902	0.266388	0.691547	0.329867		0.619477	0.630888	0.778488	0.859494	0.447121	0.40835	0.173675	0.639197
8.32	0.360906	0.717569	0.297747	0.690691	0.641094	0.279657	0.703651	0.365387		0.663054	0.651363	0.802254	0.846963	0.47712	0.420096	0.189345	0.647095
8.45	0.380091	0.750409	0.314233	0.710866	0.652675	0.29995	0.717614	0.394116		0.701041	0.671918	0.823203	0.858265	0.509897	0.435723	0.199693	0.665903
8.58	0.4107	0.779972	0.325769	0.736899	0.655704	0.349191	0.734865	0.430511		0.737782	0.697309	0.837718	0.853037	0.541708	0.47629	0.220148	0.702321
8.71	0.435787	0.788334	0.35268	0.76204	0.671872	0.381221	0.761218	0.473508		0.764505	0.720657	0.863711	0.86154	0.571567	0.512491	0.230616	0.74793
8.84	0.446465	0.807873	0.38043	0.774579	0.690811	0.421162	0.792968	0.514242		0.789611	0.750988	0.878253	0.854452	0.613865	0.558966	0.23345	0.789371
8.97	0.470529	0.824957	0.425482	0.79355	0.710618	0.455878	0.816537	0.552866		0.806685	0.786504	0.886602	0.840573	0.655449	0.615731	0.27468	0.814121
9.1	0.502076	0.857253	0.476988	0.811633	0.737924	0.502278	0.835438	0.607687		0.82803	0.828708	0.883996	0.840557	0.702078	0.683563	0.282928	0.853376
9.23	0.57009	0.877779	0.529808	0.824438	0.760895	0.533662	0.855748	0.644009		0.860413	0.856551	0.888042	0.83067	0.735951	0.738431	0.329371	0.873809
9.36	0.607692	0.886549	0.570493	0.825111	0.788232	0.570892	0.864629	0.687863		0.861763	0.879974	0.880279	0.813582	0.764655	0.784305	0.36143	0.866076
9.49	0.644523	0.887868	0.624347	0.83634	0.817489	0.62136	0.888996	0.720728		0.86675	0.894788	0.859999	0.797343	0.789867	0.831641	0.38344	0.887585
9.62	0.679922	0.889573	0.674503	0.830229	0.843924	0.653939	0.894326	0.769387		0.862399	0.890714	0.854907	0.774146	0.806503	0.874996	0.421465	0.907446
9.75	0.737521	0.884369	0.725147	0.83318	0.880326	0.68881	0.903947	0.812523		0.852872	0.889931	0.835537	0.763143	0.821693	0.896788	0.447409	0.937854
9.88	0.769087	0.879334	0.758281	0.829272	0.90115	0.73774	0.914116	0.855035		0.832633	0.886901	0.804499	0.752484	0.828631	0.918167	0.490532	0.921988
10.01	0.77665	0.877119	0.782714	0.829195	0.903957	0.780377	0.919629	0.882459		0.815358	0.87217	0.763287	0.73899	0.844876	0.934806	0.529222	0.89612
10.14	0.803685	0.864684	0.791472	0.820452	0.911039	0.825704	0.912929	0.913403		0.787263	0.855533	0.730877	0.714665	0.847602	0.946693	0.559241	0.906605
10.27	0.82647	0.85306	0.815996	0.80391	0.888885	0.850804	0.887829	0.930823		0.751473	0.840545	0.702274	0.680813	0.843971	0.961554	0.600467	0.888594
10.4	0.837541	0.828659	0.835105	0.790099	0.883142	0.863327	0.876668	0.915734		0.706742	0.81918	0.658658	0.661465	0.835276	0.968406	0.639748	0.854663
10.53	0.835527	0.76626	0.852529	0.7408	0.87167	0.870996	0.84973	0.915265		0.651836	0.784956	0.616122	0.620864	0.823467	0.965316	0.677829	0.823896
10.66	0.828038	0.708431	0.86936	0.68343	0.844677	0.876487	0.831783	0.908054		0.585619	0.742812	0.573109	0.581198	0.812826	0.951886	0.710808	0.782235
10.79	0.835285	0.649835	0.889218	0.625598	0.790819	0.860068	0.772905	0.888927		0.533865	0.695701	0.519852	0.535298	0.794571	0.930426	0.732506	0.754528
10.92	0.825519	0.58094	0.887324	0.551303	0.769639	0.8488	0.736752	0.852185		0.487043	0.630618	0.459712	0.502197	0.775003	0.89279	0.782539	0.698246
11.05	0.814652	0.528483	0.863095	0.485747	0.740072	0.840827	0.705726	0.807314		0.444317	0.564536	0.418967	0.447078	0.744997	0.846672	0.813475	0.639062
11.18	0.792703	0.470585	0.847029	0.418013	0.697302	0.817542	0.650662	0.761716		0.393987	0.501389	0.370383	0.399321	0.71758	0.790648	0.843285	0.570031
11.31	0.772508	0.405641	0.815373	0.36548	0.644982	0.772089	0.592301	0.705175		0.348977	0.444378	0.32514	0.354643	0.673277	0.724223	0.864447	0.509968
11.44	0.747792	0.346074	0.777692	0.306752	0.593412	0.741421	0.527834	0.648337		0.303125	0.389811	0.287913	0.312693	0.628429	0.664498	0.870201	0.460812
11.57	0.734402	0.28957	0.732346	0.267357	0.540103	0.696962	0.480007	0.562141		0.268968	0.347724	0.245611	0.284327	0.574383	0.601146	0.870666	0.404794
11.7	0.701466	0.256931	0.694319	0.227688	0.483016	0.631329	0.444212	0.489399		0.230263	0.30958	0.223739	0.244425	0.515218	0.539272	0.865149	0.362497
11.83	0.64799	0.219248	0.638313	0.196269	0.428894	0.577447	0.409482	0.403654		0.190083	0.273072	0.203209	0.226334	0.456396	0.47112	0.869584	0.310198
11.96	0.615637	0.191941	0.601002	0.16679	0.371917	0.50343	0.369312	0.325165		0.169472	0.245225	0.182038	0.201486	0.397313	0.413593	0.861847	0.249553
12.09	0.574491	0.176568	0.544311	0.150032	0.333316	0.427926	0.332558	0.26665		0.148644	0.22186	0.170782	0.185575	0.339086	0.356841	0.837373	0.218343
12.22	0.521261	0.159292	0.482265	0.134378	0.284534	0.37556	0.27639	0.210585		0.136427	0.199237	0.154307	0.171627	0.286692	0.301699	0.807474	0.191717
12.35	0.478934	0.150252	0.430258	0.117055	0.251595	0.322612	0.241338	0.168752		0.127125	0.1883	0.149424	0.155866	0.240843	0.254481	0.772878	0.168121
12.48	0.4273	0.133077	0.385898	0.101194	0.219688	0.269664	0.206369	0.140265		0.127779	0.167618	0.13653	0.163272	0.19319	0.219842	0.711049	0.162116
12.61	0.382345	0.121298	0.349221	0.0925897	0.190601	0.238099	0.182596	0.121982		0.116311	0.157898	0.128468	0.158472	0.16544	0.180024	0.652219	0.153881
12.74	0.335814	0.117753	0.314993	0.0889275	0.164903	0.194977	0.159845	0.0988929		0.113428	0.142347	0.122092	0.144615	0.141496	0.165575	0.600092	0.144845
12.87	0.302749	0.108893	0.27482	0.084158	0.143771	0.177071	0.14549	0.0853324		0.102067	0.131666	0.118654	0.144405	0.121922	0.147382	0.541987	0.133193
13	0.268997	0.0972411	0.230946	0.0792776	0.136418	0.158901	0.140171	0.0788686		0.0995247	0.126488	0.111114	0.133055	0.110851	0.134539	0.500767	0.131538
13.13	0.236366	0.100774	0.198277	0.0757313	0.130966	0.144668	0.135891	0.082188		0.103625	0.118557	0.108101	0.131111	0.100294	0.134	0.432165	0.125351
13.26	0.220458	0.0969449	0.173935	0.0757804	0.126467	0.137171	0.130881	0.0846654		0.096798	0.108507	0.109551	0.134362	0.097222	0.118635	0.369593	0.123492
13.39	0.202218	0.0956444	0.158061	0.0776271	0.116768	0.129225	0.120801	0.0822106		0.0897092	0.100674	0.109107	0.130979	0.0880213	0.108363	0.335454	0.133428
13.52	0.192379	0.0933118	0.141325	0.0753621	0.116105	0.130324	0.118729	0.0819561		0.0879375	0.0955616	0.11221	0.129534	0.0824094	0.103747	0.283453	0.125545
13.65	0.190551	0.0871602	0.128584	0.0742882	0.107478	0.125091	0.117613	0.0831916		0.0848365	0.0918714	0.103624	0.131703	0.083027	0.105123	0.252856	0.11002
13.78	0.174694	0.0811637	0.1163	0.074566	0.109185	0.116827	0.112961	0.077047		0.0881308	0.0889409	0.107654	0.125635	0.0794799	0.105743	0.222941	0.116751
13.91	0.165333	0.0811787	0.106192	0.0765053	0.103118	0.11535	0.107068	0.0817408		0.0899583	0.0839235	0.0985899	0.120935	0.0718408	0.0958843	0.192293	0.11435
14.04	0.170397	0.084578	0.100181	0.0734327	0.105858	0.110719	0.103597	0.0835239		0.0851559	0.076168	0.0989555	0.12997	0.0734875	0.0974094	0.181038	0.120981
14.17	0.166538	0.0797096	0.0947682	0.0681216	0.102246	0.106179	0.097823	0.0822347		0.0850899	0.0731706	0.0987175	0.132399	0.0722979	0.0903783	0.163943	0.11384
14.3	0.156712	0.0788703	0.0936002	0.0715585	0.102641	0.109444	0.086845	0.0822032		0.0836116	0.0725119	0.0954722	0.122737	0.0734282	0.0895058	0.149931	0.119924
14.43	0.154266	0.0781203	0.0906837	0.0717173	0.107399	0.103196	0.0913248	0.0811533		0.0850527	0.0706573	0.101695	0.116148	0.0711259	0.0821544	0.152633	0.119981
14.56	0.158887	0.0770437	0.0867236	0.0702469	0.105167	0.108832	0.0894445	0.0802088		0.088125	0.0732434	0.095668	0.121528	0.0722799	0.0849509	0.137144	0.114946
14.69	0.152485	0.0760686	0.0871029	0.0722505	0.106142	0.106343	0.0907169	0.0817349		0.0817628	0.0686536	0.0983013	0.120184	0.0695873	0.0821876	0.137742	0.112805
14.82	0.149891	0.0754195	0.0828178	0.0718349	0.108053	0.101871	0.0932463	0.082066		0.0813081	0.0712294	0.0946626	0.117259	0.0666016	0.082294	0.128849	0.111201
14.95		0.0582202	0.0677968	0.0732938	0.104399	0.101899	0.0924051	0.0860607		0.0816363	0.0675069	0.0940754	0.118507	0.0681047	0.0788533	0.125772	0.104237

## Sheet: Movement Rad21 TEV
no overlap										2-frame overlap										3-frame overlap
0.115262	0.132506		0.170217		0.256855	0.169533	0.52357	0.139798		0.205087	0.303522		0.379455		0.528805	0.398412	0.284098	0.201602		0.67965	0.563973		0.450328		0.21434	0.432054	0.192332	0.6586
0.222726	0.104087		0.248657		0.197482	0.218977	0.321884	0.188926		0.422783	0.243269		0.295472		0.364848	0.417808	0.393606	0.428696		0.354491	0.652644		0.455871		0.43767	0.363215	0.284511	0.382379
0.418739	0.114994	0.297061	0.23284		0.315324	0.34911	0.273389	0.264739		0.519932	0.210626	0.353971	0.412211		0.393497	0.3839	0.366736	0.403782		0.0613288	0.67438	0.348968	0.354949		0.291179	0.26699	0.359875	0.331479
0.549605	0.142823	0.270577	0.154501		0.275753	0.296105	0.282828	0.285215		0.323968	0.15843	0.389435	0.312784		0.376579	0.372417	0.460202	0.340942		0.126427	0.698747	0.339988	0.532716		0.347668	0.331479	0.25697	0.373843
0.412068	0.126054	0.250386	0.199614	0.192864	0.198349	0.276842	0.248113	0.343091		0.300155	0.206186	0.338376	0.222951	0.401987	0.503774	0.372257	0.385524	0.333021		0.287777	0.66776	0.411238	0.577435	0.405149	0.297877	0.350901	0.366363	0.323888
0.248826	0.144114	0.286123	0.18015	0.204673	0.264538	0.235886	0.204132	0.203902		0.342723	0.218262	0.342203	0.348066	0.303237	0.389508	0.430715	0.357375	0.361356		0.408451	0.637624	0.371674	0.471784	0.492091	0.345954	0.333399	0.438492	0.434742
0.341866	0.160246	0.235694	0.171333	0.199209	0.22259	0.224863	0.239249	0.260648		0.189926	0.280271	0.295184	0.287461	0.396838	0.307301	0.372742	0.312538	0.24756		0.468208	0.559483	0.469122	0.541207	0.403953	0.470109	0.402396	0.448213	0.491792
0.332963	0.170272	0.238571	0.217477	0.219484	0.168033	0.226215	0.255565	0.2378		0.219259	0.256586	0.266857	0.284196	0.245305	0.301639	0.384238	0.381122	0.24483		0.447778	0.573142	0.494571	0.498327	0.535211	0.530328	0.389547	0.363313	0.51737
0.2927	0.143481	0.21454	0.158059	0.331646	0.134291	0.280407	0.193679	0.200739		0.255304	0.331077	0.303858	0.305556	0.251265	0.265203	0.366542	0.377852	0.352813		0.451996	0.525442	0.481602	0.536385	0.417088	0.600507	0.353051	0.42847	0.446448
0.290523	0.12334	0.184607	0.162557	0.250074	0.179872	0.309981	0.254125	0.274894		0.249543	0.318253	0.32718	0.33261	0.458862	0.301362	0.492779	0.350653	0.29967		0.459934	0.558406	0.488214	0.504833	0.291065	0.518766	0.197241	0.395223	0.425437
0.299524	0.0926172	0.167142	0.199247	0.198862	0.240364	0.274869	0.266715	0.331079		0.264372	0.295314	0.25136	0.307757	0.321479	0.338865	0.485602	0.336494	0.219506		0.436104	0.612069	0.581498	0.492996	0.479659	0.420771	0.239529	0.396791	0.449415
0.265321	0.111259	0.199311	0.195461	0.261164	0.267448	0.201247	0.248981	0.269009		0.338349	0.258567	0.267717	0.275011	0.323139	0.347328	0.32057	0.384745	0.334557		0.39633	0.630174	0.532972	0.529528	0.415697	0.385224	0.478183	0.366275	0.396434
0.269188	0.113804	0.185417	0.184143	0.208571	0.252324	0.138515	0.234243	0.255262		0.387073	0.231934	0.340278	0.265541	0.483636	0.389284	0.267749	0.481043	0.326672		0.343739	0.654262	0.474306	0.550317	0.307792	0.358393	0.593735	0.284714	0.418066
0.302126	0.175724	0.212737	0.150324	0.271237	0.223846	0.259824	0.20649	0.293046		0.431413	0.315813	0.350838	0.232558	0.495699	0.372881	0.425335	0.448077	0.401334		0.266461	0.508463	0.436425	0.617118	0.233065	0.403273	0.31484	0.345433	0.30562
0.230516	0.185061	0.200135	0.186547	0.382086	0.259852	0.376329	0.216646	0.263747		0.410391	0.34666	0.298628	0.305576	0.35941	0.363221	0.379565	0.456494	0.308554		0.359092	0.468279	0.501237	0.507877	0.258503	0.376927	0.244105	0.32686	0.427699
0.260032	0.207883	0.267517	0.176842	0.393041	0.145387	0.387474	0.189049	0.222419		0.294471	0.349304	0.326682	0.243684	0.294705	0.335333	0.395887	0.304757	0.300101		0.445498	0.442813	0.4058	0.579474	0.312254	0.51928	0.216639	0.506194	0.47748
0.223157	0.250599	0.211937	0.138404	0.352941	0.136463	0.441444	0.177732	0.199791		0.330528	0.309987	0.261145	0.229508	0.329053	0.297639	0.28382	0.472932	0.281749		0.446314	0.439414	0.526918	0.632088	0.318005	0.565898	0.274736	0.349336	0.51846
0.303226	0.272829	0.259516	0.1112	0.290786	0.185941	0.323287	0.233235	0.299809		0.212903	0.311645	0.271873	0.198285	0.340376	0.222222	0.297269	0.31953	0.308281		0.483871	0.415526	0.468611	0.690514	0.368838	0.591837	0.379444	0.447235	0.39191
0.325839	0.239518	0.253561	0.150831	0.248133	0.219048	0.470343	0.193629	0.316344		0.274972	0.336588	0.325304	0.265836	0.421577	0.293452	0.203434	0.378393	0.301822		0.399189	0.423894	0.421134	0.583333	0.33029	0.4875	0.326223	0.427978	0.381834
0.190529	0.277445	0.209605	0.242252	0.280211	0.270956	0.415584	0.215115	0.15544		0.383278	0.310237	0.343858	0.272727	0.355673	0.328808	0.298456	0.266063	0.378238		0.426193	0.412318	0.446538	0.485021	0.364116	0.400236	0.285959	0.518823	0.466321
0.232309	0.174869	0.246257	0.156575	0.29553	0.233183	0.33918	0.26771	0.197524		0.314118	0.311246	0.311765	0.278693	0.371903	0.316563	0.332306	0.380654	0.311625		0.453573	0.513885	0.441979	0.564733	0.332567	0.450254	0.328514	0.351636	0.49085
0.213902	0.149038	0.184808	0.166366	0.267337	0.222316	0.256163	0.317823	0.204575		0.355944	0.276584	0.333594	0.361576	0.428141	0.274311	0.2888	0.354766	0.296335		0.430154	0.574378	0.481597	0.472058	0.304523	0.503373	0.455036	0.327411	0.49909
0.177348	0.157673	0.164684	0.256397	0.307037	0.237828	0.215224	0.305915	0.166334		0.262056	0.352125	0.253238	0.366205	0.387631	0.302744	0.224647	0.366437	0.240399		0.560596	0.490202	0.582078	0.377399	0.305332	0.459428	0.560129	0.327648	0.593267
0.280837	0.25	0.192184	0.214597	0.21808	0.308698	0.277449	0.280224	0.24123		0.312399	0.239021	0.255353	0.321351	0.387698	0.325426	0.194909	0.469175	0.320285		0.406763	0.510979	0.552463	0.464052	0.394222	0.365876	0.527642	0.2506	0.438485
0.385224	0.235613	0.188871	0.244898	0.233167	0.246177	0.198163	0.264007	0.343432		0.256596	0.29527	0.246162	0.355532	0.347847	0.374924	0.249869	0.323586	0.274223		0.358179	0.469117	0.564967	0.39957	0.418986	0.378899	0.551969	0.412408	0.382345
0.290323	0.26729	0.169063	0.225977	0.233668	0.169481	0.245362	0.271591	0.252094		0.355178	0.449546	0.184771	0.3717	0.315635	0.29581	0.235694	0.346591	0.350716		0.354499	0.283163	0.646166	0.402323	0.450697	0.534709	0.518944	0.381818	0.39719
0.246938	0.180716	0.17776	0.182703	0.138303	0.268777	0.213702	0.412589	0.213878		0.376696	0.284406	0.211305	0.321081	0.244468	0.317815	0.253491	0.411098	0.315102		0.376365	0.534877	0.610935	0.496216	0.617229	0.413408	0.532806	0.176313	0.47102
0.235487	0.16192	0.121657	0.170616	0.134272	0.25216	0.209519	0.367202	0.20121		0.344745	0.255492	0.291557	0.281572	0.258257	0.361728	0.274395	0.504015	0.287443		0.419768	0.582587	0.586786	0.547812	0.607472	0.386111	0.516086	0.128783	0.511346
0.283714	0.233447	0.234371	0.182517	0.172434	0.183393	0.253619	0.445741	0.241904		0.259429	0.257991	0.333246	0.316059	0.359165	0.356033	0.276676	0.434069	0.256133		0.456857	0.508562	0.432383	0.501424	0.468401	0.460573	0.469705	0.120189	0.501963
0.207875	0.246769	0.268828	0.256784	0.147402	0.194882	0.202501	0.411746	0.188894		0.363057	0.496615	0.479959	0.318195	0.307064	0.373103	0.319319	0.344935	0.299455		0.429068	0.256615	0.251213	0.425021	0.545534	0.432014	0.47818	0.243319	0.511651
0.172013	0.306309	0.267898	0.285836	0.248988	0.2752	0.197048	0.367028	0.170497		0.327044	0.442902	0.341801	0.450841	0.229612	0.456991	0.392025	0.369434	0.319615		0.500943	0.250789	0.3903	0.263323	0.5214	0.26781	0.410927	0.263538	0.509888

## Sheet: Movement Rad21 TEV Barren TEV
no overlap										2-frame overlap										3-frame overlap
0.179464		0.206467	0.38962	0.136796	0.167848	0.2252	0.339636	0.128857		0.401046		0.313206	0.244152	0.324721	0.214349	0.255759	0.533	0.259787		0.41949		0.480327	0.366228	0.538482	0.617803	0.519041	0.127364	0.611356
0.21118		0.16281	0.401623	0.222673	0.28425	0.20331	0.161593	0.117495		0.462328		0.259846	0.239351	0.195346	0.290774	0.27896	0.332206	0.245859		0.326492		0.577345	0.359026	0.581981	0.424977	0.51773	0.506201	0.636646
0.194452		0.0843578	0.322194	0.160724	0.261494	0.218032	0.239929	0.0740017		0.327795		0.167868	0.271122	0.202937	0.264368	0.228002	0.308734	0.260821		0.477753		0.747774	0.406683	0.63634	0.474138	0.553966	0.451337	0.665177
0.127984		0.110473	0.182422	0.102814	0.189387	0.207671	0.223919	0.128054		0.231784		0.116659	0.327031	0.184524	0.289192	0.354126	0.264631	0.332818		0.640232		0.772868	0.490547	0.712662	0.521422	0.438202	0.51145	0.539128
0.168748	0.180402	0.0522994	0.254891	0.130459	0.212814	0.205456	0.273516	0.245264		0.302533	0.178821	0.141569	0.298044	0.200056	0.280466	0.246547	0.382255	0.331007		0.528719	0.640777	0.806132	0.447066	0.669484	0.50672	0.547997	0.344229	0.423729
0.190924	0.139746	0.111659	0.215784	0.159484	0.224734	0.158192	0.249068	0.220117		0.245902	0.280928	0.26009	0.313686	0.162416	0.194149	0.259181	0.511013	0.393386		0.563175	0.579325	0.628251	0.470529	0.6781	0.581117	0.582627	0.239919	0.386497
0.114463	0.170963	0.0909485	0.198218	0.143883	0.155149	0.144273	0.236751	0.210943		0.28926	0.187743	0.216544	0.320713	0.204607	0.29016	0.295154	0.281593	0.296628		0.596277	0.641294	0.692508	0.481069	0.651511	0.554691	0.560573	0.481656	0.492429
0.11027	0.128327	0.0757705	0.210207	0.131338	0.26354	0.168269	0.190882	0.226523		0.209401	0.293017	0.229452	0.315917	0.170434	0.204062	0.286982	0.420466	0.341219		0.68033	0.578656	0.694777	0.473876	0.698228	0.532398	0.544749	0.388652	0.432258
0.0770267	0.15296	0.0969541	0.244519	0.156152	0.249752	0.135522	0.231784	0.198267		0.183247	0.390571	0.168168	0.302193	0.242349	0.298908	0.266154	0.412133	0.288191		0.739726	0.456469	0.734878	0.453289	0.601499	0.451341	0.598323	0.356083	0.513543
0.0880445	0.350149	0.167896	0.280822	0.112209	0.310183	0.102373	0.25257	0.170026		0.266914	0.33194	0.334924	0.287671	0.272872	0.230809	0.161356	0.300206	0.191279		0.645042	0.31791	0.49718	0.431507	0.614919	0.459008	0.736271	0.447224	0.638695
0.0843128	0.28801	0.135381	0.362643	0.151951	0.280836	0.145799	0.320168	0.193408		0.174503	0.343016	0.292388	0.254943	0.257837	0.265036	0.198605	0.227892	0.253531		0.741184	0.368974	0.572232	0.382414	0.590211	0.454128	0.655596	0.45194	0.55306
0.0587552	0.254436	0.0930331	0.29353	0.105658	0.23599	0.1009	0.341379	0.233394		0.119833	0.421158	0.248088	0.282588	0.272585	0.381491	0.241645	0.443448	0.309256		0.821412	0.324406	0.658879	0.423882	0.621757	0.382519	0.657455	0.215172	0.45735
0.10348	0.246217	0.0744998	0.233266	0.112714	0.188224	0.0999675	0.374871	0.244528		0.147564	0.370014	0.220519	0.306694	0.211001	0.362934	0.240831	0.381774	0.250566		0.748956	0.383769	0.704981	0.460041	0.676285	0.448842	0.659202	0.243355	0.504906
0.0864662	0.332408	0.139404	0.274455	0.153139	0.155468	0.114788	0.422851	0.15237		0.164944	0.369882	0.182132	0.290218	0.219296	0.344286	0.326784	0.330687	0.302389		0.74859	0.29771	0.678464	0.435327	0.627565	0.500245	0.558428	0.246462	0.545241
0.0961627	0.296584	0.193069	0.27459	0.17795	0.0955056	0.122018	0.370164	0.185934		0.172908	0.289483	0.276328	0.290164	0.280464	0.300562	0.293115	0.39038	0.210186		0.730929	0.413933	0.530603	0.435246	0.541586	0.603933	0.584867	0.239456	0.60388
0.0696506	0.251151	0.242542	0.239729	0.164945	0.121653	0.128567	0.330469	0.153176		0.123316	0.31098	0.363165	0.304108	0.207989	0.289338	0.250574	0.385965	0.241594		0.807034	0.43787	0.394293	0.456163	0.627066	0.589009	0.620859	0.283566	0.60523
0.0509099	0.274535	0.223993	0.221798	0.172295	0.171592	0.115287	0.304655	0.154		0.0935268	0.299967	0.360738	0.311281	0.201241	0.390848	0.267846	0.417132	0.1944		0.855563	0.425497	0.415268	0.466921	0.626465	0.43756	0.616867	0.278212	0.6516
0.100993	0.273141	0.228651	0.164185	0.183162	0.222498	0.162443	0.313755	0.23012		0.150426	0.376096	0.312849	0.334326	0.189003	0.353816	0.37167	0.333829	0.204819		0.748581	0.350763	0.4585	0.501489	0.627835	0.423687	0.465887	0.352416	0.56506
0.129957	0.314212	0.259303	0.14257	0.159974	0.179104	0.199799	0.297326	0.196265		0.233636	0.299065	0.319082	0.342972	0.35418	0.250361	0.378813	0.410695	0.204211		0.636407	0.386723	0.421615	0.514458	0.485846	0.570534	0.421388	0.291979	0.599523
0.118807	0.292015	0.210064	0.17828	0.157523	0.180788	0.200338	0.321381	0.18773		0.290362	0.253926	0.305911	0.328688	0.328521	0.218396	0.35473	0.318061	0.220859		0.590831	0.454059	0.484026	0.493032	0.513956	0.600816	0.444932	0.360558	0.591411
0.178055	0.266507	0.157832	0.211944	0.130748	0.186475	0.206767	0.363731	0.161356		0.262344	0.22648	0.245253	0.315222	0.263997	0.229508	0.427204	0.319171	0.180556		0.559601	0.507013	0.596915	0.472833	0.605255	0.584016	0.366029	0.317098	0.658088
0.149987	0.305546	0.146527	0.18319	0.125155	0.202395	0.184057	0.389361	0.178425		0.191031	0.335542	0.203131	0.326724	0.199379	0.337725	0.422853	0.398966	0.205086		0.658982	0.358912	0.650341	0.490086	0.675466	0.45988	0.393089	0.211673	0.616489
0.123192	0.302762	0.113003	0.263764	0.104147	0.210094	0.17068	0.349112	0.148833		0.155611	0.34136	0.202012	0.294494	0.320154	0.315962	0.285411	0.416568	0.202554		0.721197	0.355878	0.684985	0.441741	0.575699	0.473943	0.543909	0.23432	0.648613
0.123137	0.323733	0.133413	0.341349	0.157362	0.253394	0.201634	0.296541	0.146215		0.234058	0.331754	0.247823	0.263461	0.312765	0.325792	0.223543	0.342013	0.213446		0.642805	0.344513	0.618765	0.395191	0.529873	0.420814	0.574824	0.361446	0.640339
0.119544	0.415351	0.167253	0.423516	0.239078	0.30492	0.13558	0.235582	0.155262		0.204656	0.309218	0.2712	0.230594	0.358445	0.415977	0.225431	0.352808	0.267107		0.6758	0.275432	0.561547	0.34589	0.402477	0.279104	0.638989	0.411609	0.577631
0.1515	0.40661	0.168734	0.375	0.155326	0.256272	0.172589	0.265283	0.180119		0.219872	0.319346	0.394541	0.25	0.232302	0.590261	0.269036	0.313725	0.371181		0.628628	0.274044	0.436725	0.375	0.612371	0.153468	0.558376	0.420992	0.4487
0.104188	0.295463	0.192621	0.221896	0.235986	0.250252	0.298031	0.386796	0.160836		0.247702	0.347421	0.284856	0.311242	0.263668	0.322256	0.231947	0.208932	0.21587		0.64811	0.357115	0.522523	0.466862	0.500346	0.427492	0.470022	0.404272	0.623294
0.139529	0.329779	0.180902	0.280884	0.197694	0.239007	0.350416	0.295844	0.139308		0.18483	0.318294	0.332895	0.287647	0.303832	0.309364	0.275077	0.288982	0.202037		0.675641	0.351928	0.486202	0.43147	0.498474	0.45163	0.374507	0.415173	0.658656
0.13723	0.374062	0.233978	0.333905	0.226662	0.390805	0.210881	0.272452	0.150967		0.177382	0.269391	0.253763	0.266438	0.402342	0.421108	0.264388	0.463812	0.246812		0.685388	0.356547	0.512258	0.399657	0.370996	0.188088	0.52473	0.263736	0.602221
0.130565	0.308916	0.252936	0.300306	0.215651	0.354855	0.354855	0.283648	0.176698		0.235265	0.368355	0.247483	0.279877	0.391634	0.488053	0.488053	0.375973	0.200344		0.634171	0.322729	0.499581	0.419816	0.392715	0.157092	0.157092	0.340378	0.622958
0.0910437	0.218546	0.175161	0.350164	0.186096	0.263992	0.263992	0.265367	0.177656		0.188009	0.265564	0.269807	0.259935	0.248128	0.30213	0.30213	0.311844	0.127289		0.720947	0.51589	0.555032	0.389902	0.565775	0.433878	0.433878	0.422789	0.695055
