# Supplementary material for: Metaphase chromosome structure is dynamically maintained by condensin I-directed DNA (de)catenation
Source: eLife. 2017 May 6;6:e26120. doi: 10.7554/eLife.26120 (PMC5451211; doi:10.7554/eLife.26120)
Supplement: Figure 5—source data 1. — Individual measurements of chromosome thickness, length and mean voxel intensity upon TEV-mediated cleavage of Read21TEV and Rad21TEV+BarrenTEV. Each data set is presented on a separate sheet. File includes descriptive statistics. DOI: http://dx.doi.org/10.7554/eLife.26120.018 [file elife-26120-fig5-data1.xlsx]

## Sheet: Chromatid length
	Rad21TEV	Rad21TEV; BarrenTEV			Frequency distrubution (bin 0,5)
	2.035	1.533
	3.951	1.553							Descriptive statistics
	2.559	1.537			Bin Center	Rad21TEV	Rad21TEV; BarrenTEV
	3.957	1.948			0.5	0	0			Rad21TEV	Rad21TEV; BarrenTEV
	2.72	2.021			1	1.5873	10.3704		Total number of values	126	135
	2.58	1.406			1.5	3.1746	47.4074		Number of excluded values	0	0
	3.502	2.075			2	18.254	22.2222		Number of binned values	126	135
	5.741	1.667			2.5	30.1587	11.8519
	3.331	2.098			3	13.4921	5.92593		Minimum	1.111	0.91
	4.383	1.635			3.5	12.6984	2.22222		25% Percentile	2.29625	1.482
	4.114	2.447			4	13.4921	0		Median	2.7105	1.665
	3.686	2.703			4.5	3.1746	0		75% Percentile	3.67075	2.098
	2.291	1.604			5	1.5873	0		Maximum	6.018	3.613
	2.591	1.587			5.5	1.5873	0
	2.39	1.472			6	0.793651	0		Mean	2.94114	1.83775
	3.527	1.565			6.5	0	0		Std. Deviation	0.924733	0.532791
	2.136	1.183							Std. Error of Mean	0.0823818	0.0458553
	3.734	1.335
	2.679	2.049							Lower 95% CI of mean	2.7781	1.74705
	3.416	1.507							Upper 95% CI of mean	3.10419	1.92844
	3.869	1.435
	2.708	1.31
	4.088	0.937
	3.058	2.783
	3.856	1.453
	2.107	1.913
	2.173	1.4
	2.457	2.836
	2.065	2.479
	2.035	2.348
	2.33	1.665
	4.183	1.746
	2.396	2.455
	2.58	1.226
	3.708	1.111
	2.116	2.655
	1.111	2.085
	3.182	1.874
	4.216	1.471
	2.821	2.158
	2.792	1.453
	3.593	1.357
	3.506	1.587
	3.763	2.8
	2.21	2.816
	5.24	1.51
	2.502	1.587
	2.753	1.565
	2.302	1.482
	4.761	1.612
	2.355	1.565
	2.971	1.226
	2.511	2.055
	2.218	3.306
	1.56	1.953
	3.055	2.425
	2.823	1.571
	2.485	1.118
	1.933	1.199
	2.009	1.848
	1.71	1.655
	2.223	1.569
	2.687	3.613
	3.67	1.3
	2.478	1.453
	1.482	2.132
	3.007	1.199
	2.022	1.69
	2.021	1.287
	2.45	1.111
	2.728	2.376
	2.246	1.226
	3.243	1.655
	1.806	1.665
	3.212	1.644
	2.063	2.359
	3.683	2.86
	3.75	1.665
	2.593	1.695
	2.45	2.663
	2.164	2.917
	3.358	1.99
	4.168	3.001
	2.687	2.218
	2.315	2.03
	3.263	1.587
	3.304	1.862
	4.025	1.88
	2.502	1.56
	2.632	1.772
	3.762	1.59
	2.786	1.749
	1.357	2.42
	1.962	2.538
	2.671	2.098
	3.83	2.354
	4.453	2.705
	3.89	1.768
	1.959	2.224
	2.288	1.608
	2.73	1.306
	3.673	1.571
	1.199	1.652
	4.545	1.984
	4.052	1.665
	2.224	2.638
	6.018	1.655
	2.812	1.482
	2.713	2.247
	3.521	2.718
	5.511	1.644
	4.536	2.031
	2.802	1.436
	2.298	1.9
	2.391	2.049
	2.18	1.875
	2.501	1.587
	2.326	1.749
	4.16	1.933
	2.314	1.768
	2.9	2.878
	2.906	1.71
	2.424	1.644
	2.785	1.287
	2.489	1.199
	1.95	1.177
		1.248
		1.3
		0.91
		1.572
		3.254
		1.748
		1.571
		1.338
		1.382

## Sheet: Chromatid width
Rad21 TEV	Rad21 TEV Barren TEV			Frequency distrubution
0.46	0.758								Descriptive statistics
0.363	0.703			Bin Center	Rad21 TEV	Rad21 TEV Barren TEV				Rad21 TEV	Rad21 TEV Barren TEV
0.423	0.64			0.2	0	0			Total number of values	306	351
0.352	0.552			0.25	1.63399	0			Number of excluded values	0	0
0.35	0.555			0.3	9.80392	0.569801			Number of binned values	306	351
0.371	0.579			0.35	38.2353	2.2792
0.402	0.613			0.4	32.0261	7.12251			Minimum	0.242	0.28
0.339	0.529			0.45	12.4183	17.094			25% Percentile	0.349	0.469
0.352	0.683			0.5	4.90196	29.3447			Median	0.378	0.514
0.352	0.611			0.55	0.980392	18.2336			75% Percentile	0.414	0.577
0.331	0.64			0.6	0	13.6752			Maximum	0.559	0.758
0.393	0.679			0.65	0	7.12251
0.363	0.73			0.7	0	3.7037			Mean	0.382186	0.524228
0.335	0.654			0.75	0	0.854701			Std. Deviation	0.0534716	0.0812487
0.325	0.696			0.8	0	0			Std. Error of Mean	0.00305677	0.00433674
0.395	0.67
0.322	0.716								Lower 95% CI of mean	0.376171	0.515699
0.452	0.508								Upper 95% CI of mean	0.388201	0.532757
0.424	0.469
0.359	0.605
0.424	0.495
0.4	0.586
0.39	0.521
0.368	0.648
0.384	0.514
0.447	0.452
0.403	0.67
0.326	0.453
0.308	0.625
0.412	0.559
0.247	0.469
0.495	0.679
0.242	0.462
0.328	0.455
0.369	0.437
0.325	0.552
0.291	0.569
0.39
0.31	0.581
0.392	0.559
0.484	0.617
0.368	0.38
0.378	0.483
0.353	0.569
	0.524
0.383	0.525
0.386	0.621
0.414	0.48
0.384	0.489
0.559	0.631
0.395	0.483
0.414	0.521
0.295	0.524
0.347	0.556
0.369	0.436
0.43	0.568
0.357	0.702
0.369	0.639
0.412	0.462
0.338	0.624
0.468	0.469
	0.533
	0.533
	0.553
	0.613
	0.495
0.508	0.514
0.282	0.495
0.379	0.621
0.388	0.553
0.347	0.437
0.338	0.465
0.4	0.597
0.359	0.605
0.368	0.46
0.347	0.654
	0.621
	0.553
	0.735
	0.7
	0.508
	0.611
	0.683
	0.28
0.417	0.553
0.339	0.605
0.391	0.625
0.391	0.686
0.371	0.589
0.429	0.613
0.438	0.586
0.357	0.395
0.412	0.509
0.414	0.465
0.388	0.65
0.426	0.414
0.427	0.653
0.338	0.391
0.391	0.46
	0.52
	0.663
	0.553
	0.424
	0.505
	0.496
	0.631
0.378	0.483
0.403	0.424
0.326	0.509
0.391	0.423
0.455	0.525
0.417	0.424
0.368	0.483
0.353	0.506
0.369	0.497
0.481	0.48
0.349	0.514
0.52	0.625
0.369	0.462
0.418	0.65
0.374	0.524
0.414	0.529
0.322	0.569
0.368	0.533
0.343	0.481
0.325	0.511
	0.477
0.339	0.572
0.369	0.505
0.433	0.414
0.412	0.447
0.371	0.451
0.355	0.447
0.412	0.705
0.277	0.487
0.31	0.563
0.368	0.484
0.291	0.508
0.379	0.543
0.398	0.607
0.511	0.479
0.432	0.43
0.477	0.353
0.491	0.503
0.371	0.572
0.398	0.511
0.378	0.457
0.414	0.416
0.357	0.599
0.347	0.599
0.417	0.542
0.436	0.5
0.414	0.383
0.456	0.524
0.306	0.414
0.386	0.572
	0.611
	0.499
	0.508
0.405	0.514
0.4	0.343
0.4	0.531
0.349	0.386
0.368	0.447
0.291	0.373
0.338	0.5
0.253	0.469
0.368	0.391
0.353	0.68
0.331	0.569
0.37	0.421
0.336	0.549
0.31	0.429
0.434	0.43
0.435	0.536
0.383	0.442
0.386	0.616
0.398	0.506
0.347	0.475
0.325	0.37
0.434	0.421
0.435	0.468
0.416	0.457
0.369	0.52
0.39	0.507
0.391	0.494
0.339	0.476
0.308	0.565
0.339	0.464
0.322	0.562
0.384	0.451
0.291	0.607
0.308	0.491
0.331	0.457
0.368	0.5
0.254	0.577
0.353	0.589
0.46	0.524
0.434	0.475
0.264	0.421
0.325	0.475
0.325	0.481
0.32	0.548
0.369	0.32
0.398	0.457
0.369	0.477
0.295	0.542
0.361	0.445
0.409	0.465
0.325	0.542
0.304	0.569
0.417	0.61
0.538	0.585
0.291	0.499
0.412	0.547
0.412	0.384
0.339	0.461
0.368	0.511
0.331	0.508
0.386	0.355
0.361	0.585
0.353	0.432
0.417	0.494
0.481	0.451
0.457	0.451
0.349	0.531
0.304	0.522
0.436	0.567
0.477	0.451
0.349	0.43
0.368	0.524
0.457	0.434
0.421	0.475
0.395	0.524
0.374	0.412
0.435	0.552
0.37	0.463
0.347	0.589
0.416	0.49
0.379	0.564
0.378	0.517
0.46	0.43
0.457	0.39
0.353	0.487
0.395	0.481
0.378	0.49
0.369	0.503
0.359	0.473
0.371	0.349
0.349	0.542
0.398	0.574
0.322	0.484
0.373	0.629
0.303	0.559
0.347	0.477
0.386	0.457
0.368	0.546
0.325	0.495
0.35	0.506
0.347	0.455
0.37	0.535
0.373	0.475
0.414	0.547
0.338	0.504
0.369	0.5
0.31	0.477
0.411	0.383
0.355	0.414
0.445	0.467
0.379	0.412
0.322	0.491
0.416	0.495
0.371	0.508
0.461	0.576
0.373	0.65
0.295	0.57
0.368	0.499
	0.528
	0.608
	0.672
	0.459
	0.481
	0.628
0.368	0.554
0.336	0.607
0.369	0.562
0.388	0.637
0.282
0.338
0.383
0.416
0.378
0.353
0.403
0.446	0.5
0.411	0.433
0.405	0.563
0.417	0.5
0.499	0.338
0.475	0.481
0.494	0.477
0.35	0.569
0.447	0.66
0.456	0.407
0.391	0.515
0.4	0.598
0.417	0.498
0.456	0.521
0.517	0.659
0.414	0.494
0.353	0.499
0.369	0.522
0.386	0.547
0.368	0.583
0.447	0.614
0.407	0.595
0.477	0.564
0.418	0.535
0.464	0.587
0.414	0.459
0.355	0.368
0.398	0.464
0.312	0.552
0.31	0.499
0.407	0.506
0.355	0.411
0.357	0.477
0.395	0.477
0.439	0.522
0.439	0.624
0.542	0.475
0.409	0.5
0.374	0.477
0.395	0.607
0.477	0.465
0.438	0.529
0.357	0.506
	0.476
	0.585
	0.521
	0.524
	0.604
	0.562
	0.565
	0.599
	0.563
	0.65
	0.505
	0.521
	0.581
	0.581
	0.621
	0.607
	0.702
	0.46
	0.427
	0.499
	0.543
	0.505

## Sheet: Chromatid Mean Voxel Intensity
Chromatid Mean Voxel Intensity (t20/t5)
Each value corresponds to an individual embryo (calculated from the mean of aproximately 6 chromatids)
Rad21TEV	Rad21TEV; BarrenTEV
1.43783	1.09608
2.01664	1.35907
1.11296	1.36154
1.10911	1.29599
1.44378	1.31914
1.14297	1.07677
1.18732	1.26741
1.02408	1.36744
1.13998	1.57813
1.13653	1.22723
1.1182	1.12123
1.28258
1.25427
