# Supplementary material for: Metaphase chromosome structure is dynamically maintained by condensin I-directed DNA (de)catenation
Source: eLife. 2017 May 6;6:e26120. doi: 10.7554/eLife.26120 (PMC5451211; doi:10.7554/eLife.26120)
Supplement: Figure 6—source data 1. — Anaphase profiles for HisH2Av-mRFP1 and Cid-EGFP measured 4–6 min after anaphase onset (Figure 6b-2). Each measurement represents the average for independent embryos (resulting from at least eight anaphases measured). Individual sheets include either the same measurement for the four experimental conditions or both Cid-EGFP and HisH2Av-mRFP1 for the same experiment, as indicated. Centromere separation measurements (Figure 6f) also include descriptive statistics. DOI: http://dx.doi.org/10.7554/eLife.26120.022 [file elife-26120-fig6-data1.xlsx]

## Sheet: Histone Profiles
	TEV											TEV Buffer											ICRF											ICRF+TEV
0	0.0767414	0.146377	0.281229	0.0996429	0.156027	0.116635	0.200616	0.276024	0.193133	0.148144		0.152233	0.217061	0.185298	0.329939	0.263602	0.286801	0.164403	0.347539	0.243237	0.378463		0.232292	0.0962327	0.256572	0.26095	0.315744	0.274347	0.204565	0.0990281	0.202445	0.295326		0.145838	0.21381	0.1609	0.0904401	0.22987	0.243736	0.149421	0.117694	0.1924	0.125648	0.349141
0.13	0.0813962	0.149837	0.283513	0.107771	0.154568	0.116376	0.198351	0.249488	0.203072	0.152693		0.157138	0.216965	0.187312	0.347907	0.260559	0.306557	0.169603	0.351406	0.240612	0.393629		0.268471	0.102987	0.267117	0.290022	0.34823	0.281963	0.221044	0.0950414	0.2193	0.298458		0.143363	0.218988	0.160918	0.0962844	0.224551	0.229769	0.151916	0.124271	0.209606	0.121403	0.357241
0.26	0.0826822	0.148395	0.315794	0.103143	0.152902	0.113399	0.212868	0.260555	0.200674	0.157936		0.150182	0.223187	0.176569	0.363536	0.266115	0.317778	0.165716	0.343336	0.233636	0.412411		0.313877	0.0999115	0.274492	0.320556	0.38375	0.290166	0.237707	0.0902979	0.232558	0.319689		0.144811	0.218532	0.162643	0.0879832	0.238687	0.235208	0.157568	0.117436	0.212397	0.118369	0.385782
0.39	0.0839154	0.141087	0.29197	0.103087	0.162283	0.114603	0.217179	0.261116	0.194071	0.159963		0.161007	0.226618	0.17024	0.373384	0.27114	0.34126	0.175789	0.324485	0.228625	0.431565		0.356809	0.0998374	0.281868	0.361812	0.411509	0.309432	0.235901	0.0894806	0.249752	0.339374		0.14231	0.243436	0.146526	0.0887531	0.254116	0.237147	0.15311	0.120044	0.205643	0.121875	0.431102
0.52	0.0793447	0.14171	0.257983	0.0966359	0.149612	0.110064	0.213705	0.264965	0.176615	0.161921		0.181669	0.23543	0.167973	0.376262	0.279956	0.340908	0.175274	0.328753	0.217972	0.475369		0.406702	0.0952794	0.288834	0.407892	0.466082	0.338153	0.245188	0.0932723	0.268879	0.385056		0.145697	0.230667	0.14355	0.0924733	0.257934	0.246928	0.152623	0.115836	0.216054	0.124461	0.429043
0.65	0.082153	0.143185	0.283248	0.0988766	0.149586	0.100467	0.21029	0.260656	0.187877	0.157114		0.190594	0.25058	0.169608	0.411673	0.304548	0.377784	0.178408	0.32962	0.231643	0.503659		0.462899	0.10613	0.301754	0.436621	0.502615	0.332688	0.243898	0.0864243	0.299699	0.414573		0.147915	0.242576	0.148394	0.0885616	0.275466	0.235689	0.157584	0.127858	0.219045	0.124432	0.454421
0.78	0.0794444	0.141293	0.290501	0.103415	0.150676	0.101047	0.216624	0.263218	0.177951	0.158298		0.204779	0.263807	0.17453	0.431073	0.326176	0.400844	0.191188	0.350688	0.23122	0.524742		0.504224	0.112749	0.323492	0.472068	0.540546	0.363954	0.255148	0.0818813	0.319099	0.454232		0.146317	0.254256	0.13977	0.0877122	0.296553	0.23812	0.160232	0.12803	0.246077	0.126319	0.486348
0.91	0.076704	0.13588	0.261213	0.109327	0.14763	0.101821	0.203252	0.236168	0.179202	0.161609		0.212799	0.287882	0.192559	0.452089	0.344045	0.413465	0.187381	0.374353	0.22451	0.57003		0.55624	0.0960395	0.347673	0.503235	0.567092	0.378904	0.250543	0.0813027	0.345337	0.493109		0.152612	0.24983	0.136408	0.0873556	0.298502	0.248976	0.165002	0.135652	0.246672	0.134034	0.502385
1.04	0.0781323	0.14051	0.254055	0.105252	0.148824	0.105523	0.193482	0.225622	0.188648	0.167727		0.235796	0.31415	0.192373	0.493115	0.357314	0.431721	0.192964	0.393813	0.222463	0.59686		0.599748	0.101366	0.358779	0.52914	0.604852	0.386856	0.260393	0.0926226	0.369756	0.550842		0.145948	0.259685	0.136292	0.0874999	0.317371	0.242386	0.16078	0.140304	0.245374	0.124964	0.538891
1.17	0.0789658	0.137004	0.240023	0.107868	0.142194	0.101646	0.219559	0.21547	0.184619	0.169625		0.259661	0.364656	0.199671	0.535419	0.377864	0.475632	0.199909	0.449237	0.23139	0.633318		0.638651	0.113128	0.403031	0.57227	0.655128	0.435841	0.270091	0.0865638	0.398118	0.572039		0.143662	0.289068	0.142739	0.0900195	0.334363	0.222323	0.147503	0.140285	0.262262	0.140296	0.570929
1.3	0.079355	0.122906	0.251982	0.106597	0.141322	0.102174	0.225795	0.213062	0.193911	0.171337		0.279435	0.408948	0.209751	0.58223	0.405834	0.518162	0.205511	0.47119	0.236134	0.659683		0.678452	0.112352	0.448778	0.603062	0.674961	0.469241	0.287258	0.0938762	0.43327	0.632335		0.142907	0.293898	0.153551	0.0818362	0.349546	0.245341	0.148418	0.141703	0.276575	0.135715	0.590257
1.43	0.083031	0.121245	0.273917	0.109487	0.142404	0.108669	0.202539	0.200193	0.199961	0.175401		0.30261	0.444723	0.214476	0.623831	0.426424	0.560441	0.21424	0.513102	0.255474	0.683863		0.72482	0.11823	0.480177	0.637732	0.712324	0.497123	0.288167	0.0926842	0.47429	0.670363		0.141494	0.308561	0.152139	0.0813498	0.3649	0.232014	0.14717	0.156781	0.272628	0.143912	0.634042
1.56	0.0882515	0.121573	0.279846	0.101773	0.150769	0.108982	0.207447	0.212052	0.199805	0.176948		0.324204	0.506819	0.234955	0.662853	0.43389	0.584001	0.223228	0.542096	0.261923	0.684267		0.773397	0.121842	0.508234	0.647555	0.749657	0.524097	0.313543	0.0968016	0.507573	0.701129		0.137418	0.325695	0.147625	0.0883399	0.398119	0.231511	0.151093	0.159612	0.279468	0.153903	0.660889
1.69	0.0895121	0.127485	0.255791	0.110049	0.15944	0.123287	0.223779	0.208391	0.184412	0.171507		0.351969	0.558738	0.263688	0.676556	0.479076	0.642182	0.230639	0.571733	0.278849	0.706504		0.796162	0.115067	0.536017	0.659465	0.780276	0.539816	0.341033	0.109756	0.55377	0.757196		0.136873	0.350673	0.139788	0.0878719	0.413946	0.225036	0.153155	0.167438	0.29733	0.155904	0.67707
1.82	0.09795	0.122666	0.257572	0.11411	0.154778	0.128762	0.191957	0.190538	0.189656	0.176126		0.404806	0.61054	0.276915	0.696772	0.489827	0.670759	0.236017	0.622822	0.285164	0.712602		0.816508	0.110255	0.572025	0.68576	0.795273	0.562416	0.36093	0.117287	0.598047	0.796156		0.137713	0.352054	0.158568	0.0869697	0.430214	0.220105	0.153741	0.178685	0.304465	0.162326	0.699874
1.95	0.105497	0.120828	0.283734	0.116521	0.160842	0.135057	0.202932	0.19377	0.181899	0.176629		0.443064	0.65698	0.309987	0.733039	0.489459	0.711274	0.249886	0.634329	0.296031	0.72531		0.845699	0.118322	0.599036	0.712691	0.808269	0.599051	0.388529	0.14662	0.642009	0.826357		0.146062	0.356277	0.165307	0.0908382	0.454427	0.217489	0.144723	0.196585	0.315337	0.158695	0.745861
2.08	0.112814	0.123172	0.261845	0.11579	0.172991	0.141561	0.216737	0.196841	0.178152	0.18211		0.482729	0.709781	0.34395	0.748691	0.494543	0.733221	0.251266	0.65659	0.317319	0.725348		0.864086	0.122697	0.627623	0.709126	0.802514	0.624908	0.40405	0.172137	0.684163	0.852634		0.140384	0.356293	0.155722	0.0905021	0.464875	0.214015	0.156268	0.217034	0.332602	0.16638	0.758724
2.21	0.116769	0.125268	0.284751	0.113565	0.184966	0.138886	0.223619	0.205956	0.174599	0.187372		0.528922	0.744681	0.380255	0.754505	0.500784	0.77293	0.265818	0.681995	0.345865	0.736065		0.861935	0.126573	0.661657	0.701851	0.824736	0.660879	0.406414	0.191932	0.717611	0.880711		0.145439	0.361392	0.153455	0.102577	0.481576	0.221566	0.158194	0.230863	0.341758	0.178184	0.765041
2.34	0.123005	0.120664	0.262414	0.107812	0.19309	0.141087	0.21599	0.209782	0.174482	0.18683		0.572703	0.778904	0.419936	0.756717	0.499681	0.784485	0.263621	0.704951	0.348236	0.732298		0.868592	0.120489	0.680759	0.700559	0.818963	0.660964	0.408783	0.22593	0.74936	0.894272		0.147399	0.366314	0.175623	0.110545	0.492866	0.210104	0.159458	0.252311	0.362806	0.209065	0.781191
2.47	0.129113	0.124764	0.280997	0.109036	0.203639	0.146434	0.206468	0.218194	0.184159	0.200433		0.630329	0.777551	0.474243	0.763689	0.503727	0.789328	0.271809	0.723524	0.378443	0.737927		0.857996	0.125608	0.70253	0.696395	0.797153	0.699418	0.437709	0.263636	0.768628	0.902257		0.151618	0.372432	0.170597	0.125074	0.508115	0.216487	0.153066	0.276264	0.354613	0.216238	0.785885
2.6	0.13274	0.133369	0.3123	0.111862	0.203795	0.153644	0.213158	0.199093	0.18943	0.216938		0.684659	0.78341	0.515329	0.756733	0.527769	0.792825	0.292303	0.77236	0.422355	0.731106		0.854194	0.13394	0.691875	0.702064	0.78168	0.699566	0.444277	0.296506	0.779949	0.914949		0.160883	0.357608	0.165029	0.14186	0.525465	0.221462	0.16654	0.307762	0.380994	0.226285	0.808568
2.73	0.139022	0.127272	0.321825	0.113166	0.214031	0.15735	0.196317	0.195098	0.184469	0.229866		0.726949	0.79479	0.56366	0.737784	0.5235	0.797154	0.30629	0.794806	0.471158	0.731123		0.821316	0.138985	0.696858	0.698465	0.761296	0.710353	0.462922	0.322345	0.784867	0.925089		0.165457	0.367871	0.180778	0.152845	0.52984	0.21692	0.170722	0.32801	0.408094	0.25528	0.797996
2.86	0.138521	0.131679	0.341709	0.120116	0.223812	0.154496	0.17677	0.19603	0.193329	0.247257		0.752119	0.761801	0.607823	0.68828	0.53879	0.784387	0.334725	0.804086	0.525408	0.716713		0.794138	0.146247	0.705875	0.69378	0.731651	0.719592	0.484038	0.337631	0.782834	0.910503		0.169835	0.361367	0.205496	0.155881	0.542528	0.220994	0.190851	0.377993	0.430259	0.285548	0.796915
2.99	0.137063	0.14145	0.376504	0.126168	0.230093	0.154565	0.197699	0.198392	0.19956	0.264651		0.783985	0.737727	0.647734	0.656734	0.563419	0.767174	0.378042	0.805172	0.592786	0.691094		0.765496	0.156996	0.707502	0.688969	0.700756	0.721697	0.516023	0.361268	0.777729	0.894509		0.182941	0.37601	0.214275	0.168445	0.561013	0.226741	0.196345	0.397683	0.437044	0.310243	0.796645
3.12	0.136592	0.139818	0.393964	0.133787	0.256499	0.152789	0.205865	0.233769	0.223718	0.27976		0.792805	0.706195	0.66284	0.605864	0.583763	0.748597	0.43121	0.794071	0.665439	0.679768		0.737484	0.168745	0.690164	0.670974	0.670801	0.737213	0.539241	0.380961	0.757773	0.883704		0.19509	0.38674	0.227081	0.172838	0.582537	0.243856	0.208881	0.431123	0.451483	0.337411	0.794343
3.25	0.136829	0.14792	0.380989	0.142995	0.285874	0.165693	0.201713	0.236923	0.224207	0.289383		0.786138	0.678394	0.6928	0.576667	0.604938	0.738481	0.494726	0.789824	0.720456	0.663267		0.679829	0.183552	0.683459	0.647695	0.627758	0.75915	0.594411	0.400371	0.734422	0.834697		0.207774	0.385438	0.226296	0.194619	0.595966	0.259242	0.224661	0.460402	0.476408	0.354143	0.768983
3.38	0.135933	0.140915	0.409744	0.156894	0.302109	0.164238	0.210339	0.247991	0.240532	0.299459		0.772931	0.638351	0.71937	0.520088	0.603887	0.712269	0.554497	0.780119	0.757092	0.65041		0.651009	0.18955	0.663381	0.611789	0.60083	0.768578	0.610488	0.417243	0.702256	0.798192		0.229015	0.394132	0.226223	0.217781	0.624643	0.27117	0.229872	0.500211	0.495208	0.383095	0.757976
3.51	0.13201	0.149273	0.45447	0.173944	0.333287	0.17782	0.223302	0.259169	0.252472	0.313493		0.759414	0.592552	0.730332	0.471968	0.618765	0.682114	0.629028	0.746884	0.792542	0.624919		0.60792	0.203603	0.662238	0.596113	0.557775	0.76413	0.637787	0.444222	0.674878	0.763499		0.246855	0.402831	0.233719	0.243193	0.637677	0.275646	0.249365	0.524927	0.516628	0.399286	0.716942
3.64	0.134018	0.163995	0.469343	0.197102	0.354975	0.187732	0.233969	0.249241	0.271035	0.327766		0.720042	0.538877	0.735106	0.438758	0.615997	0.639952	0.689429	0.70535	0.814357	0.583169		0.553942	0.224693	0.641625	0.589414	0.529092	0.759137	0.660572	0.477676	0.636503	0.691674		0.269263	0.413857	0.264243	0.257611	0.654033	0.29702	0.267096	0.552528	0.517663	0.427774	0.698278
3.77	0.132634	0.178545	0.46614	0.220757	0.384152	0.19645	0.250545	0.27579	0.310717	0.348248		0.674198	0.493017	0.726739	0.412504	0.63454	0.598217	0.751291	0.681284	0.829892	0.540317		0.516648	0.240864	0.610742	0.5791	0.496472	0.778785	0.666299	0.525219	0.593236	0.624997		0.28738	0.425989	0.276634	0.279274	0.661642	0.326328	0.284401	0.581068	0.521193	0.440841	0.664254
3.9	0.139297	0.187891	0.484819	0.240682	0.419427	0.203936	0.24456	0.282481	0.34191	0.362719		0.632721	0.444472	0.710389	0.406024	0.644786	0.559273	0.803419	0.652153	0.828613	0.528436		0.480898	0.261462	0.599556	0.561229	0.446484	0.788234	0.681722	0.566784	0.576781	0.581281		0.318676	0.445379	0.27416	0.304364	0.681158	0.345839	0.304457	0.609699	0.548128	0.454768	0.651221
4.03	0.147956	0.205271	0.516348	0.270026	0.447018	0.210603	0.26709	0.29793	0.3782	0.385682		0.58753	0.40327	0.708088	0.361731	0.651215	0.534677	0.849064	0.617264	0.82194	0.504599		0.442383	0.277694	0.571821	0.549073	0.418908	0.786454	0.710056	0.6181	0.530755	0.548665		0.339548	0.458882	0.280672	0.321415	0.683088	0.366445	0.326028	0.626959	0.554257	0.475674	0.624709
4.16	0.151688	0.223399	0.508263	0.294827	0.468869	0.231442	0.271251	0.312251	0.410162	0.401376		0.532098	0.355338	0.69941	0.340764	0.652883	0.500281	0.872822	0.579733	0.826272	0.466576		0.402366	0.299047	0.549552	0.530351	0.40404	0.792402	0.710303	0.664607	0.496928	0.501816		0.360891	0.460354	0.295484	0.340903	0.685703	0.39889	0.333078	0.656233	0.553022	0.503219	0.606363
4.29	0.165584	0.237356	0.502193	0.326299	0.494577	0.264117	0.252659	0.328045	0.441167	0.414114		0.489233	0.331078	0.664177	0.327936	0.650158	0.483291	0.893712	0.551405	0.818752	0.451911		0.368345	0.323059	0.521195	0.514559	0.382715	0.784171	0.728034	0.710839	0.465398	0.456356		0.388983	0.46793	0.301715	0.363267	0.694214	0.420651	0.355395	0.667802	0.589552	0.526276	0.602874
4.42	0.189016	0.257213	0.486882	0.354645	0.519042	0.276842	0.272987	0.35034	0.483017	0.425964		0.436896	0.30441	0.66189	0.313231	0.646776	0.441396	0.900084	0.512598	0.801649	0.427826		0.328014	0.338283	0.503264	0.493014	0.36302	0.776638	0.756562	0.718854	0.450208	0.43135		0.407218	0.489435	0.305208	0.385387	0.703957	0.457976	0.372406	0.688356	0.592971	0.550769	0.594157
4.55	0.212156	0.291396	0.469718	0.38996	0.537141	0.29761	0.286222	0.351613	0.501376	0.443793		0.41057	0.285155	0.631277	0.30403	0.628517	0.40605	0.892241	0.494533	0.765626	0.418125		0.313894	0.359822	0.472835	0.477552	0.345845	0.782081	0.763295	0.722795	0.430033	0.403014		0.433783	0.511371	0.312577	0.401759	0.704982	0.488598	0.397505	0.708214	0.608772	0.572956	0.583511
4.68	0.23844	0.314107	0.453454	0.426262	0.552928	0.317127	0.296848	0.380564	0.540548	0.457595		0.360436	0.270774	0.601094	0.302244	0.620918	0.412001	0.868823	0.457709	0.729097	0.395228		0.296089	0.382835	0.466489	0.451142	0.341084	0.770803	0.761209	0.715021	0.394011	0.385849		0.467114	0.534967	0.315074	0.42059	0.712261	0.50958	0.409756	0.720829	0.612315	0.590196	0.553749
4.81	0.271918	0.338986	0.42732	0.456071	0.57033	0.332915	0.325384	0.406498	0.570685	0.471863		0.331636	0.26689	0.561901	0.287491	0.608601	0.388406	0.829058	0.431812	0.693845	0.389556		0.283338	0.406855	0.460528	0.429847	0.313348	0.772425	0.756754	0.699975	0.373253	0.357003		0.488158	0.557051	0.328134	0.44464	0.703118	0.531042	0.434339	0.727613	0.635816	0.597715	0.516799
4.94	0.305362	0.376334	0.44779	0.487524	0.591106	0.353618	0.342892	0.449948	0.605862	0.48244		0.300781	0.247585	0.536464	0.281606	0.574013	0.37331	0.789911	0.406286	0.656466	0.370657		0.265756	0.427477	0.436008	0.409663	0.309256	0.734839	0.752064	0.681331	0.350393	0.336169		0.518235	0.604195	0.36987	0.466183	0.712695	0.571479	0.465114	0.739859	0.639407	0.611247	0.500717
5.07	0.342189	0.404342	0.448735	0.517811	0.613039	0.372192	0.374221	0.468883	0.637365	0.490619		0.268368	0.238797	0.508678	0.273135	0.562992	0.368314	0.748458	0.389336	0.621838	0.369292		0.25726	0.45538	0.416863	0.39956	0.287107	0.732943	0.717363	0.652481	0.320871	0.310704		0.556425	0.620134	0.368273	0.494448	0.714334	0.602101	0.493173	0.757798	0.642348	0.617884	0.50083
5.2	0.37665	0.439367	0.449311	0.561202	0.631745	0.400358	0.425585	0.503478	0.659772	0.487116		0.25149	0.248769	0.494642	0.266566	0.542528	0.354423	0.686214	0.367928	0.580768	0.357633		0.241934	0.473585	0.421408	0.376198	0.282632	0.710738	0.700652	0.624566	0.30613	0.301501		0.577571	0.628161	0.372696	0.521651	0.709605	0.61715	0.523214	0.760481	0.690804	0.624409	0.473371
5.33	0.407242	0.48566	0.445462	0.602282	0.648067	0.427773	0.475948	0.513238	0.691091	0.490791		0.230586	0.244946	0.443481	0.258359	0.509427	0.34503	0.633928	0.340311	0.550026	0.351478		0.244993	0.501925	0.415555	0.346728	0.280719	0.701688	0.685009	0.597326	0.286188	0.302545		0.600832	0.646023	0.393873	0.547268	0.70971	0.651341	0.551729	0.78143	0.689726	0.636615	0.434047
5.46	0.443995	0.519431	0.458722	0.634792	0.667205	0.457386	0.517668	0.5775	0.717624	0.495051		0.209587	0.234917	0.413882	0.263964	0.491811	0.336475	0.563187	0.310136	0.516141	0.353027		0.226832	0.533851	0.396551	0.33655	0.259221	0.700054	0.654482	0.570823	0.267531	0.284189		0.644958	0.678408	0.430628	0.580185	0.687214	0.683762	0.576905	0.77756	0.692275	0.641299	0.437701
5.59	0.46783	0.55774	0.48621	0.662721	0.678536	0.478879	0.564882	0.608086	0.739563	0.50184		0.192267	0.237234	0.391358	0.253153	0.471295	0.316945	0.515984	0.305765	0.477322	0.335806		0.213752	0.554387	0.399726	0.329391	0.250389	0.674895	0.633081	0.526461	0.249468	0.288121		0.672808	0.703769	0.45707	0.624345	0.678079	0.685246	0.598285	0.781722	0.706022	0.645877	0.40804
5.72	0.502486	0.60096	0.490069	0.697581	0.695679	0.502757	0.585295	0.64523	0.75577	0.514116		0.181019	0.229889	0.374014	0.253259	0.458688	0.312371	0.475891	0.294067	0.432551	0.334091		0.201679	0.582816	0.386643	0.312434	0.239423	0.664175	0.599938	0.48835	0.235451	0.277485		0.692937	0.718969	0.510744	0.653051	0.687472	0.719878	0.630158	0.798657	0.72283	0.655307	0.399934
5.85	0.540643	0.637058	0.515681	0.730791	0.713713	0.53153	0.618508	0.686113	0.767693	0.537866		0.176858	0.221316	0.356065	0.242836	0.446586	0.302843	0.441068	0.289494	0.397769	0.315368		0.202333	0.60476	0.38173	0.316356	0.245937	0.652115	0.579173	0.452682	0.231015	0.286353		0.712204	0.72779	0.549292	0.683168	0.689741	0.746248	0.647982	0.826316	0.727937	0.653654	0.400376
5.98	0.573212	0.68176	0.542818	0.754176	0.721725	0.5603	0.668058	0.702973	0.785606	0.565214		0.176093	0.209983	0.337302	0.231162	0.441826	0.282164	0.409187	0.274146	0.361958	0.301494		0.189597	0.637411	0.372936	0.325737	0.243895	0.644278	0.558765	0.416698	0.221953	0.260618		0.73463	0.725556	0.598101	0.703681	0.679302	0.779801	0.660802	0.834497	0.738327	0.663053	0.352824
6.11	0.613489	0.718253	0.540521	0.791344	0.749926	0.603359	0.700831	0.726829	0.790342	0.600603		0.165188	0.207362	0.320591	0.216898	0.420291	0.289624	0.388983	0.285945	0.346895	0.293098		0.181937	0.68082	0.370291	0.316063	0.228175	0.630077	0.536339	0.38572	0.213985	0.256526		0.751934	0.752382	0.646915	0.714145	0.677059	0.803087	0.691213	0.842272	0.758578	0.664623	0.342525
6.24	0.649619	0.74426	0.583937	0.820295	0.762509	0.639232	0.745854	0.751595	0.805871	0.643472		0.152391	0.194357	0.31745	0.215362	0.401529	0.27173	0.354427	0.26415	0.336249	0.290295		0.17729	0.708798	0.367882	0.312997	0.212792	0.639971	0.512312	0.352249	0.21113	0.255782		0.771432	0.790019	0.689265	0.741147	0.671194	0.794445	0.704428	0.839248	0.753028	0.665401	0.354619
6.37	0.679793	0.782791	0.59147	0.842812	0.776945	0.670751	0.783424	0.760206	0.820743	0.669761		0.146809	0.187516	0.307261	0.209786	0.385502	0.272501	0.343075	0.256668	0.312829	0.290245		0.168944	0.741891	0.379602	0.314398	0.211746	0.647769	0.496199	0.304171	0.215003	0.245743		0.776	0.786936	0.749604	0.759049	0.685671	0.805201	0.723468	0.863447	0.745309	0.670239	0.3238
6.5	0.708968	0.810517	0.597545	0.86334	0.793971	0.716047	0.795807	0.789339	0.823919	0.687599		0.148765	0.194919	0.30133	0.224822	0.388531	0.281158	0.324259	0.246497	0.304491	0.284481		0.172895	0.766823	0.375681	0.309427	0.210096	0.614406	0.479212	0.271966	0.211737	0.23323		0.785865	0.797106	0.807643	0.780111	0.669388	0.843283	0.729065	0.864819	0.759651	0.674592	0.319905
6.63	0.728381	0.826363	0.590104	0.891899	0.807358	0.73252	0.830915	0.805576	0.849263	0.708096		0.141455	0.195426	0.296849	0.229806	0.382359	0.288341	0.319356	0.246268	0.305087	0.268308		0.168924	0.796627	0.379409	0.304744	0.201438	0.626154	0.465582	0.251958	0.215126	0.210424		0.78346	0.810533	0.820436	0.794565	0.667501	0.829259	0.747644	0.867739	0.768977	0.688082	0.321388
6.76	0.749343	0.850359	0.613261	0.907551	0.804664	0.763116	0.85917	0.828897	0.856227	0.726402		0.128702	0.201636	0.287104	0.217705	0.357996	0.28205	0.308663	0.26035	0.29267	0.270209		0.16779	0.808418	0.37156	0.295518	0.196744	0.618641	0.469007	0.244713	0.227241	0.176025		0.792778	0.807331	0.878459	0.808109	0.675056	0.836184	0.752666	0.865548	0.774974	0.675343	0.32103
6.89	0.757069	0.86097	0.613949	0.913365	0.808721	0.790041	0.875372	0.860551	0.856236	0.739961		0.13528	0.204232	0.2771	0.214245	0.360108	0.260077	0.303668	0.237968	0.284101	0.274608		0.163496	0.81708	0.355889	0.29588	0.202816	0.623309	0.477055	0.227415	0.231321	0.170671		0.797346	0.822497	0.896401	0.81917	0.673275	0.831857	0.759345	0.859437	0.767437	0.683847	0.308658
7.02	0.764159	0.875466	0.658705	0.92596	0.807879	0.802814	0.871869	0.847291	0.868204	0.750929		0.135016	0.202271	0.277962	0.214829	0.359539	0.260694	0.30826	0.251123	0.281227	0.280454		0.157368	0.830087	0.375073	0.308742	0.201784	0.620226	0.469775	0.220085	0.22899	0.158839		0.807693	0.825025	0.94259	0.822889	0.677419	0.839178	0.77628	0.853651	0.77101	0.684501	0.310741
7.15	0.757682	0.879442	0.689323	0.937181	0.807352	0.806452	0.892433	0.841851	0.863963	0.761372		0.135945	0.201454	0.281675	0.200312	0.344855	0.254134	0.310663	0.237331	0.277827	0.265885		0.155722	0.824145	0.362679	0.301982	0.188237	0.603532	0.453663	0.218455	0.228319	0.181722		0.814311	0.832886	0.955134	0.823357	0.655928	0.843803	0.783698	0.840705	0.764365	0.689585	0.310482
7.28	0.755404	0.888427	0.66067	0.937286	0.80396	0.809	0.90023	0.843196	0.863029	0.765454		0.131572	0.210626	0.276148	0.214973	0.327194	0.25567	0.317976	0.255124	0.270844	0.261595		0.152727	0.834083	0.365882	0.292881	0.186598	0.610148	0.448461	0.205363	0.231488	0.164462		0.822421	0.846412	0.965858	0.850743	0.644353	0.849889	0.786018	0.822389	0.762429	0.698087	0.290857
7.41	0.736569	0.893829	0.676697	0.924977	0.800053	0.816456	0.900683	0.822548	0.868636	0.763268		0.13066	0.206051	0.28346	0.209382	0.326402	0.258971	0.314004	0.253675	0.275938	0.264767		0.161214	0.841313	0.369213	0.287082	0.191223	0.600889	0.451453	0.210328	0.246301	0.177798		0.813998	0.827433	0.963617	0.85274	0.636962	0.837453	0.777961	0.809421	0.780996	0.699601	0.315265
7.54	0.732163	0.887094	0.661578	0.920323	0.792199	0.809061	0.910188	0.797497	0.853993	0.760151		0.129477	0.208029	0.282336	0.201583	0.331997	0.264241	0.32041	0.261603	0.26645	0.259816		0.1591	0.826207	0.35295	0.28552	0.187224	0.596492	0.452626	0.209648	0.249215	0.179908		0.816216	0.827059	0.946275	0.843697	0.643177	0.826093	0.780931	0.781954	0.788513	0.71242	0.317887
7.67	0.736355	0.891689	0.669352	0.910519	0.778897	0.801262	0.90583	0.817745	0.849259	0.759006		0.128013	0.21867	0.299583	0.193852	0.337557	0.246564	0.317028	0.266358	0.274308	0.269853		0.158455	0.830214	0.346209	0.291725	0.184035	0.586594	0.441119	0.215066	0.257512	0.171891		0.811031	0.824433	0.942772	0.859974	0.634105	0.826915	0.777327	0.758601	0.770778	0.728707	0.310652
7.8	0.737663	0.897684	0.672702	0.897138	0.785308	0.778405	0.909441	0.80021	0.84504	0.748057		0.134561	0.224658	0.305294	0.200419	0.329659	0.254896	0.326055	0.256323	0.288168	0.259927		0.164066	0.830127	0.328956	0.296992	0.193046	0.597672	0.43922	0.20232	0.257045	0.170793		0.799807	0.785437	0.910261	0.851108	0.625818	0.816914	0.786066	0.729101	0.782481	0.736095	0.329493
7.93	0.740228	0.890805	0.690351	0.873061	0.783084	0.73879	0.869996	0.781693	0.825984	0.743202		0.140915	0.218791	0.304013	0.199405	0.320992	0.250572	0.328315	0.245599	0.311489	0.265872		0.164137	0.811734	0.335139	0.302946	0.190355	0.570981	0.432811	0.197326	0.270864	0.18754		0.772976	0.799894	0.889278	0.838218	0.627236	0.796809	0.78005	0.717903	0.778607	0.750153	0.327744
8.06	0.74582	0.8887	0.684105	0.846849	0.757288	0.724108	0.860205	0.789721	0.812754	0.739235		0.140197	0.230689	0.32013	0.218891	0.333807	0.251864	0.330573	0.258376	0.316169	0.268152		0.171739	0.796862	0.318664	0.298067	0.199923	0.564725	0.446672	0.190801	0.257717	0.198839		0.754831	0.807375	0.840178	0.818615	0.64028	0.776706	0.771348	0.711301	0.749638	0.754211	0.327708
8.19	0.744411	0.870155	0.691702	0.83717	0.751054	0.686625	0.834735	0.780949	0.80686	0.724951		0.138814	0.226143	0.329467	0.21982	0.33069	0.271382	0.338637	0.246455	0.323384	0.268405		0.1812	0.783898	0.330005	0.30997	0.20249	0.566399	0.45351	0.198144	0.279286	0.21358		0.743687	0.80771	0.784448	0.78914	0.62921	0.770262	0.76547	0.699545	0.755705	0.763391	0.328084
8.32	0.751571	0.864519	0.682222	0.80974	0.72705	0.649843	0.806433	0.751239	0.795913	0.704916		0.143834	0.24258	0.33612	0.219888	0.343734	0.293898	0.347531	0.249573	0.340429	0.279012		0.186147	0.769862	0.342505	0.313816	0.201383	0.546005	0.452943	0.213039	0.276959	0.207855		0.718076	0.782306	0.739188	0.759766	0.630723	0.762148	0.760579	0.683926	0.754687	0.790431	0.346086
8.45	0.755361	0.845244	0.651324	0.789179	0.713659	0.617456	0.781247	0.721723	0.785327	0.690965		0.151732	0.234396	0.35045	0.231123	0.352081	0.288503	0.348483	0.235915	0.363111	0.284615		0.175076	0.747911	0.336534	0.321747	0.207252	0.568538	0.487019	0.227172	0.276413	0.18978		0.696552	0.771196	0.690278	0.736219	0.638018	0.731996	0.751729	0.679826	0.743421	0.800179	0.364992
8.58	0.750448	0.818077	0.658751	0.758277	0.692513	0.583539	0.756102	0.716947	0.755907	0.675693		0.151189	0.233685	0.368038	0.250504	0.341169	0.31283	0.364175	0.252001	0.371084	0.276788		0.181268	0.739305	0.355821	0.317674	0.203305	0.56517	0.523356	0.246524	0.306603	0.204925		0.67475	0.783643	0.644747	0.707871	0.649928	0.727911	0.739849	0.6771	0.762213	0.807557	0.36857
8.71	0.743275	0.799309	0.615468	0.735206	0.679542	0.53726	0.761869	0.652772	0.738291	0.658557		0.165725	0.240632	0.374062	0.245966	0.351132	0.319664	0.379373	0.239171	0.392174	0.268313		0.194375	0.724623	0.349351	0.324291	0.217423	0.570155	0.530937	0.275565	0.319066	0.228451		0.642542	0.755131	0.578342	0.681543	0.646516	0.721663	0.729314	0.664171	0.740583	0.813611	0.378427
8.84	0.739298	0.771092	0.580533	0.70698	0.67242	0.517422	0.7099	0.64559	0.709479	0.649926		0.161421	0.245087	0.369099	0.244517	0.359184	0.327316	0.383219	0.242634	0.407948	0.266684		0.195149	0.710774	0.359731	0.337731	0.232778	0.572324	0.543467	0.301576	0.325158	0.231194		0.618927	0.746424	0.557218	0.658955	0.637329	0.695613	0.718505	0.672128	0.743676	0.82786	0.419041
8.97	0.719821	0.759411	0.587426	0.676005	0.649282	0.50429	0.669183	0.608954	0.687982	0.644044		0.166397	0.254733	0.401642	0.244441	0.36634	0.33688	0.388399	0.260884	0.422379	0.264768		0.197831	0.697176	0.359902	0.346964	0.23591	0.574031	0.572403	0.354734	0.351524	0.228469		0.586357	0.725514	0.514458	0.633391	0.633676	0.677117	0.695167	0.671192	0.751556	0.849134	0.436883
9.1	0.701117	0.728618	0.554573	0.644578	0.639026	0.484747	0.651785	0.550747	0.67742	0.64174		0.177774	0.239843	0.416776	0.237163	0.383865	0.343185	0.397556	0.272149	0.436912	0.295238		0.195489	0.679003	0.366824	0.350008	0.241649	0.553016	0.581584	0.412887	0.38273	0.227626		0.545546	0.716072	0.472463	0.610216	0.619761	0.662908	0.678753	0.678212	0.761053	0.86562	0.430722
9.23	0.688252	0.696335	0.527608	0.598929	0.627362	0.462737	0.633987	0.524063	0.650108	0.636448		0.19854	0.235425	0.443099	0.246369	0.393092	0.376629	0.421682	0.275223	0.461821	0.307595		0.215328	0.644942	0.37439	0.382742	0.264401	0.536878	0.600164	0.484274	0.402324	0.242625		0.512312	0.689499	0.448996	0.581349	0.608769	0.655138	0.658325	0.668415	0.757315	0.867006	0.445303
9.36	0.664549	0.65945	0.501756	0.569225	0.607314	0.434893	0.589606	0.478969	0.634608	0.629949		0.222029	0.259888	0.465817	0.267083	0.398072	0.382464	0.422864	0.281475	0.503895	0.304973		0.220005	0.620735	0.407041	0.37774	0.270437	0.555458	0.623557	0.559268	0.408572	0.24008		0.462287	0.686323	0.420443	0.548083	0.616713	0.636817	0.632988	0.667174	0.742105	0.867904	0.468194
9.49	0.645577	0.626932	0.485205	0.531124	0.591692	0.411511	0.545583	0.464328	0.614275	0.625086		0.22938	0.253768	0.496946	0.272813	0.411951	0.406081	0.434534	0.291537	0.528929	0.30528		0.231936	0.588424	0.417614	0.397546	0.286739	0.551706	0.647923	0.639825	0.443867	0.263493		0.427725	0.685093	0.396475	0.517701	0.626047	0.611297	0.626282	0.649547	0.732115	0.873839	0.5085
9.62	0.628063	0.588109	0.457123	0.496101	0.569176	0.394961	0.554642	0.421798	0.595257	0.615673		0.252483	0.285388	0.520738	0.292801	0.436498	0.410649	0.455895	0.300027	0.57428	0.299819		0.241803	0.557284	0.456117	0.414995	0.286995	0.57382	0.678143	0.707715	0.481481	0.253533		0.392209	0.654205	0.397739	0.495511	0.639278	0.600713	0.622148	0.640558	0.72302	0.881801	0.55194
9.75	0.616204	0.536432	0.452893	0.447995	0.568427	0.366977	0.535762	0.395667	0.579456	0.598516		0.266719	0.299922	0.537282	0.284362	0.451896	0.426988	0.483242	0.315847	0.624115	0.309462		0.259189	0.525961	0.489606	0.425085	0.290921	0.555875	0.711618	0.74949	0.528174	0.259422		0.358322	0.648308	0.374711	0.475036	0.624935	0.566914	0.605815	0.637525	0.718909	0.872166	0.555055
9.88	0.593182	0.506419	0.447105	0.411272	0.550748	0.353286	0.514231	0.394843	0.549976	0.591172		0.296898	0.31798	0.568535	0.293791	0.491398	0.459518	0.509273	0.336682	0.67964	0.311875		0.294254	0.492529	0.524781	0.436001	0.317953	0.550653	0.718714	0.77795	0.563294	0.269477		0.32548	0.630835	0.36467	0.448799	0.626271	0.568326	0.594178	0.623122	0.682369	0.864881	0.571323
10.01	0.569206	0.461569	0.446019	0.367179	0.525306	0.331601	0.473607	0.376163	0.537682	0.577231		0.3229	0.340738	0.601073	0.315866	0.509516	0.477613	0.530746	0.347266	0.728552	0.336033		0.318239	0.471606	0.553398	0.456522	0.337935	0.571306	0.729985	0.808395	0.590544	0.287653		0.294147	0.627097	0.352404	0.425178	0.642936	0.542608	0.573773	0.606309	0.68547	0.850698	0.571824
10.14	0.540895	0.430566	0.435168	0.326097	0.501136	0.313624	0.448197	0.352529	0.515027	0.564136		0.362149	0.354631	0.627458	0.32478	0.547732	0.486144	0.558907	0.36538	0.757856	0.331508		0.343731	0.442057	0.59125	0.479988	0.35834	0.563995	0.749314	0.845224	0.652457	0.281441		0.267998	0.624149	0.329299	0.390775	0.648671	0.530293	0.555427	0.593807	0.683298	0.823578	0.607685
10.27	0.508955	0.403146	0.448634	0.281126	0.488887	0.293109	0.449184	0.307867	0.50725	0.547654		0.406448	0.370178	0.670473	0.340243	0.583623	0.501222	0.580447	0.38231	0.779409	0.340202		0.374814	0.420216	0.604227	0.51211	0.38236	0.568285	0.756809	0.847187	0.684697	0.287421		0.246161	0.626193	0.30487	0.365145	0.633858	0.48293	0.529544	0.577801	0.682977	0.808744	0.631413
10.4	0.476072	0.369697	0.45468	0.243994	0.461755	0.276317	0.413414	0.288966	0.488705	0.523076		0.455195	0.379373	0.692113	0.356412	0.600796	0.511808	0.602746	0.397684	0.814283	0.352078		0.402277	0.395033	0.634448	0.536298	0.401475	0.571802	0.770632	0.84797	0.72047	0.314988		0.221535	0.602455	0.304917	0.339362	0.624581	0.4624	0.507079	0.568186	0.650084	0.783258	0.63929
10.53	0.449598	0.346689	0.451193	0.214799	0.459874	0.269202	0.382835	0.278814	0.469631	0.496964		0.512444	0.40892	0.711521	0.393212	0.624259	0.533712	0.619573	0.441447	0.839656	0.383863		0.455087	0.381406	0.669628	0.548283	0.430589	0.600708	0.780528	0.84771	0.75393	0.350429		0.204727	0.573396	0.305982	0.313108	0.607069	0.439006	0.500927	0.545593	0.65416	0.761739	0.642745
10.66	0.415465	0.315775	0.45811	0.190439	0.445195	0.246721	0.361876	0.284635	0.4508	0.469825		0.568472	0.421925	0.735426	0.435853	0.624895	0.561456	0.643676	0.482301	0.855644	0.400921		0.454994	0.355364	0.687348	0.575596	0.451581	0.617167	0.78327	0.827712	0.786576	0.367283		0.192061	0.563442	0.30703	0.287409	0.616474	0.419613	0.490344	0.522681	0.640224	0.736002	0.64373
10.79	0.398923	0.28545	0.431917	0.164916	0.430387	0.233434	0.338636	0.277755	0.423221	0.447749		0.628331	0.443659	0.733311	0.463156	0.63639	0.574407	0.650552	0.535421	0.860716	0.431095		0.490711	0.331222	0.720446	0.616526	0.498388	0.60238	0.80192	0.791511	0.829548	0.367585		0.182687	0.561308	0.297779	0.274638	0.616554	0.400826	0.450774	0.510243	0.637872	0.702736	0.678289
10.92	0.377353	0.266546	0.439354	0.147039	0.42046	0.200739	0.31642	0.267985	0.402324	0.42693		0.685487	0.472796	0.730616	0.491158	0.658144	0.600876	0.655984	0.600444	0.850071	0.462908		0.524539	0.307047	0.742375	0.631593	0.547728	0.590683	0.79103	0.749425	0.836149	0.425108		0.170934	0.552217	0.285804	0.253113	0.610599	0.373188	0.429979	0.485353	0.627128	0.683573	0.687556
11.05	0.348748	0.243236	0.431386	0.129379	0.411593	0.19359	0.307753	0.253711	0.384533	0.402633		0.73036	0.51929	0.739796	0.549763	0.633683	0.638289	0.654142	0.659548	0.830797	0.491049		0.560288	0.29086	0.766802	0.671699	0.583191	0.608872	0.792031	0.696246	0.863794	0.449569		0.161791	0.528017	0.281888	0.221961	0.610389	0.36917	0.409083	0.446814	0.607529	0.656818	0.677394
11.18	0.321526	0.229187	0.412056	0.114784	0.406252	0.182666	0.306109	0.258828	0.363317	0.38021		0.776709	0.57356	0.730407	0.586346	0.62333	0.658681	0.641646	0.705764	0.798102	0.514022		0.581083	0.270071	0.769847	0.711624	0.625674	0.589278	0.768486	0.63621	0.881003	0.503436		0.155385	0.527515	0.261281	0.200679	0.610883	0.349626	0.381948	0.438387	0.603253	0.610737	0.698188
11.31	0.306978	0.209857	0.403847	0.105521	0.386775	0.174773	0.288336	0.239768	0.339881	0.362037		0.831457	0.612303	0.73146	0.649939	0.620145	0.670868	0.631148	0.727108	0.778661	0.534648		0.621354	0.260104	0.789417	0.719465	0.668005	0.581388	0.751672	0.568701	0.888811	0.538238		0.157359	0.529759	0.249211	0.181755	0.598433	0.329391	0.36726	0.408089	0.575448	0.580325	0.718617
11.44	0.293881	0.200911	0.409741	0.0995298	0.364055	0.17624	0.299737	0.225769	0.32836	0.34412		0.848566	0.630082	0.713461	0.692124	0.596566	0.706473	0.60881	0.775942	0.749315	0.576909		0.654628	0.247515	0.796669	0.742878	0.723964	0.570105	0.73205	0.506933	0.886072	0.579629		0.151646	0.512162	0.243162	0.16046	0.592727	0.310674	0.334155	0.36519	0.56907	0.531755	0.711184
11.57	0.272461	0.18618	0.345784	0.0947405	0.349199	0.175105	0.274515	0.232905	0.309455	0.328391		0.874709	0.68051	0.69605	0.739603	0.584957	0.729844	0.587481	0.794279	0.679127	0.610771		0.67447	0.237437	0.788057	0.753605	0.750405	0.583721	0.725693	0.445525	0.896128	0.616063		0.154363	0.49005	0.24924	0.140878	0.584447	0.301933	0.323705	0.345658	0.555984	0.50324	0.721429
11.7	0.256774	0.175799	0.333742	0.094601	0.337299	0.16026	0.258131	0.224543	0.302821	0.30746		0.890876	0.722998	0.679064	0.781477	0.566975	0.728692	0.553838	0.818455	0.653966	0.62922		0.706724	0.235097	0.793645	0.792788	0.796312	0.571318	0.696607	0.379184	0.914723	0.654558		0.151598	0.486458	0.230343	0.132987	0.578786	0.285579	0.307585	0.32665	0.537961	0.456847	0.751134
11.83	0.239059	0.169696	0.344178	0.0912816	0.324911	0.160079	0.23958	0.207454	0.290578	0.291791		0.877191	0.726567	0.63603	0.822154	0.552017	0.727944	0.51013	0.810403	0.608015	0.643809		0.731296	0.217346	0.795877	0.781889	0.825411	0.576341	0.670938	0.341661	0.904438	0.664477		0.158636	0.498588	0.233879	0.123031	0.587936	0.274508	0.272725	0.295527	0.53401	0.413125	0.761908
11.96	0.228702	0.161778	0.317503	0.0930268	0.296015	0.156802	0.241226	0.200832	0.274964	0.274177		0.882083	0.751521	0.598991	0.855525	0.545911	0.713905	0.466987	0.822682	0.556343	0.665239		0.754669	0.207371	0.773281	0.801078	0.844665	0.587909	0.654765	0.311662	0.895799	0.714392		0.150435	0.473968	0.219356	0.119784	0.574292	0.281247	0.262271	0.273748	0.513148	0.387417	0.743775
12.09	0.215441	0.156155	0.304555	0.0888059	0.286373	0.170143	0.213412	0.198871	0.269151	0.253162		0.862986	0.752411	0.556261	0.864121	0.51235	0.68837	0.436855	0.800651	0.505661	0.674743		0.788798	0.197711	0.781081	0.791468	0.87225	0.569591	0.613042	0.276152	0.879776	0.758551		0.147592	0.478597	0.220417	0.122813	0.564827	0.262062	0.24786	0.243256	0.483525	0.36081	0.785122
12.22	0.198158	0.152791	0.285528	0.0879903	0.27322	0.169629	0.231466	0.210777	0.256967	0.239678		0.820215	0.749059	0.533373	0.875346	0.491848	0.672766	0.391784	0.798783	0.463148	0.666949		0.78363	0.188562	0.761538	0.79791	0.875612	0.565345	0.570408	0.238426	0.855466	0.775763		0.146417	0.453819	0.199702	0.118136	0.551115	0.249821	0.230639	0.230637	0.455595	0.328079	0.796213
12.35	0.188719	0.155504	0.276851	0.0850378	0.269522	0.175005	0.207188	0.188391	0.249358	0.220516		0.775797	0.72034	0.497677	0.88203	0.472856	0.649314	0.363031	0.755902	0.414712	0.66728		0.791285	0.176138	0.748388	0.791048	0.895933	0.567381	0.552371	0.206529	0.842085	0.77566		0.15336	0.430966	0.199677	0.115052	0.525053	0.259065	0.207794	0.215331	0.446898	0.30999	0.805587
12.48	0.175634	0.154935	0.264346	0.083133	0.253306	0.177273	0.20989	0.177088	0.23037	0.207703		0.735678	0.684815	0.439576	0.868596	0.443562	0.604953	0.327673	0.713705	0.369502	0.661876		0.814983	0.167892	0.731887	0.760894	0.905429	0.539792	0.483847	0.178915	0.807418	0.772141		0.150005	0.41327	0.200228	0.110787	0.506784	0.245472	0.196271	0.189537	0.42639	0.282197	0.801909
12.61	0.164714	0.147994	0.275178	0.0874935	0.240443	0.175675	0.209418	0.190066	0.238038	0.202091		0.680976	0.647042	0.386536	0.85057	0.43891	0.574187	0.298135	0.688768	0.331047	0.662255		0.810033	0.160941	0.710602	0.730768	0.913363	0.510303	0.450906	0.152358	0.781245	0.766307		0.147554	0.416955	0.17753	0.102825	0.497358	0.241554	0.198919	0.179288	0.415074	0.250059	0.788377
12.74	0.152905	0.145248	0.280434	0.0847973	0.224809	0.176313	0.193783	0.18	0.228326	0.194092		0.625491	0.612142	0.359439	0.818049	0.41518	0.556666	0.25995	0.645389	0.302097	0.635311		0.810534	0.150953	0.688374	0.708294	0.899902	0.506235	0.415663	0.13562	0.745183	0.76199		0.147086	0.396966	0.164034	0.107764	0.474054	0.242535	0.184425	0.172424	0.411338	0.24356	0.776193
12.87	0.143102	0.145468	0.274733	0.0865982	0.221169	0.181524	0.193975	0.182373	0.228962	0.186301		0.56443	0.558313	0.326413	0.791953	0.387855	0.512451	0.238904	0.608121	0.2804	0.626058		0.807854	0.12928	0.66056	0.677796	0.892006	0.462628	0.371586	0.112384	0.709458	0.777711		0.142498	0.379864	0.187634	0.105735	0.445051	0.231285	0.187085	0.152836	0.383535	0.220503	0.77675
13	0.141798	0.142129	0.262392	0.0805419	0.2227	0.178806	0.207005	0.169873	0.219636	0.181999		0.496328	0.505885	0.293291	0.765067	0.35637	0.483022	0.226831	0.57153	0.259737	0.610002		0.771566	0.118156	0.632826	0.651717	0.866936	0.453226	0.32078	0.0966464	0.654584	0.756534		0.137317	0.371333	0.176868	0.100825	0.420341	0.255845	0.186674	0.149177	0.354201	0.212686	0.746475
13.13	0.133108	0.142873	0.238333	0.0892892	0.211339	0.184051	0.200531	0.175141	0.223064	0.172458		0.446356	0.470322	0.26684	0.70769	0.333987	0.446833	0.207538	0.526104	0.243211	0.583232		0.751396	0.121659	0.61036	0.621396	0.827082	0.434063	0.29009	0.0808784	0.615508	0.720748		0.136161	0.36004	0.17316	0.0985125	0.401107	0.229983	0.182727	0.133624	0.340013	0.1887	0.728157
13.26	0.125214	0.151193	0.242771	0.0857389	0.204222	0.18229	0.177419	0.16516	0.226571	0.163746		0.399748	0.429425	0.234383	0.664553	0.31493	0.422878	0.195711	0.476754	0.236321	0.567513		0.726349	0.117241	0.568378	0.580964	0.803484	0.425594	0.280621	0.081713	0.578163	0.679688		0.139106	0.366104	0.182758	0.0966063	0.382991	0.240147	0.190352	0.128734	0.327228	0.174541	0.71478
13.39	0.122435	0.143824	0.248303	0.0908873	0.199125	0.177495	0.182138	0.166927	0.22333	0.162487		0.356039	0.374858	0.224708	0.631272	0.303033	0.404062	0.181252	0.43602	0.234311	0.542378		0.699214	0.11558	0.539842	0.539342	0.761502	0.404126	0.249988	0.0711497	0.537309	0.639442		0.13687	0.349245	0.17502	0.0964734	0.380488	0.261786	0.191476	0.12457	0.310565	0.164852	0.699329
13.52	0.113601	0.143982	0.234361	0.0853944	0.200821	0.17395	0.213594	0.15632	0.220137	0.162788		0.313164	0.32309	0.204867	0.588187	0.301884	0.378937	0.17513	0.421101	0.224384	0.513914		0.655301	0.102983	0.502443	0.503872	0.707402	0.392854	0.240505	0.0654882	0.499225	0.592808		0.137597	0.338309	0.157246	0.106915	0.355819	0.259292	0.186971	0.120406	0.288373	0.146026	0.680206
13.65	0.109669	0.144082	0.22064	0.0861824	0.194317	0.176623	0.1952	0.17877	0.212274	0.158751		0.276798	0.272028	0.206139	0.564536	0.276653	0.386171	0.16329	0.399948	0.209259	0.49257		0.616904	0.0976513	0.49183	0.459198	0.649008	0.354876	0.23873	0.0650976	0.461456	0.56199		0.141801	0.328806	0.156554	0.104804	0.337703	0.251936	0.174815	0.119152	0.284184	0.14492	0.646083
13.78	0.104177	0.141128	0.231083	0.0868761	0.18392	0.181612	0.200972	0.168408	0.195686	0.152355		0.253134	0.246566	0.1967	0.51087	0.276702	0.353073	0.164122	0.374841	0.212975	0.454896		0.592191	0.0971267	0.452967	0.408228	0.606521	0.339345	0.217665	0.0662144	0.408828	0.51547		0.1365	0.334915	0.159685	0.1064	0.335609	0.231152	0.190224	0.120723	0.273794	0.140314	0.597722
13.91	0.102327	0.139056	0.229471	0.0878379	0.185883	0.174823	0.209758	0.163452	0.196185	0.14608		0.228264	0.243507	0.195956	0.468343	0.270281	0.333106	0.149714	0.353157	0.213613	0.430324		0.554156	0.0944001	0.432672	0.367448	0.537179	0.330728	0.218571	0.0649199	0.368912	0.454163		0.124291	0.309796	0.158281	0.107452	0.315455	0.239572	0.18535	0.121107	0.281053	0.143381	0.586822
14.04	0.101343	0.136375	0.244089	0.0887481	0.184011	0.169263	0.215927	0.154601	0.195009	0.140832		0.212516	0.24179	0.188338	0.425536	0.256439	0.330669	0.145932	0.33988	0.214127	0.403619		0.512799	0.0916029	0.415303	0.318597	0.49604	0.30705	0.229451	0.0690865	0.341161	0.396132		0.132689	0.313131	0.170773	0.0945617	0.298042	0.235518	0.179157	0.115976	0.251257	0.146629	0.549368
14.17	0.0979115	0.137027	0.239042	0.0907718	0.171774	0.161375	0.194476	0.143645	0.195837	0.134032		0.197037	0.228991	0.179479	0.398271	0.245544	0.308238	0.143249	0.325794	0.208855	0.388		0.473093	0.0932346	0.392331	0.297208	0.45817	0.291741	0.210508	0.0610929	0.296319	0.377985		0.127872	0.324908	0.171101	0.10452	0.290288	0.233073	0.181859	0.115991	0.250204	0.145731	0.523435
14.3	0.0979115	0.129845	0.258276	0.0857165	0.175597	0.160383	0.236883	0.149508	0.205736	0.13249		0.190758	0.217833	0.18337	0.359506	0.247534	0.300756	0.138684	0.295573	0.203815	0.355829		0.447825	0.0929696	0.381643	0.25774	0.404378	0.290531	0.203503	0.0594474	0.257426	0.336069		0.126904	0.304058	0.159508	0.108363	0.260602	0.237243	0.181976	0.112085	0.247373	0.142956	0.508475
14.43	0.0979115	0.129845	0.258276	0.0868395	0.183539	0.154114	0.202822	0.145785	0.192157	0.127793		0.181777	0.21563	0.168135	0.336325	0.240725	0.284178	0.137364	0.299829	0.198577	0.337544		0.417835	0.0933383	0.349337	0.232225	0.357314	0.275653	0.19906	0.0590783	0.23607	0.279155		0.126173	0.292924	0.1768	0.115967	0.237229	0.241068	0.175678	0.114139	0.235281	0.13846	0.489576
14.56	0.0979115	0.129845	0.258276	0.0902372	0.17968	0.149889	0.210455	0.160738	0.186152	0.123496		0.167986	0.208338	0.174059	0.32674	0.227124	0.289938	0.130929	0.295867	0.200591	0.308682		0.385008	0.0970117	0.341369	0.218662	0.325963	0.235534	0.179899	0.0584731	0.202165	0.249187		0.127585	0.27915	0.161003	0.122171	0.232638	0.233194	0.171742	0.115748	0.237885	0.137378	0.47466
14.69	0.0979115	0.129845	0.258276	0.0943468	0.186235	0.148531	0.193941	0.142963	0.185719	0.122613		0.163887	0.194425	0.171041	0.293374	0.220576	0.277467	0.111496	0.274504	0.203697	0.290463		0.353394	0.0935819	0.286471	0.19857	0.294486	0.236372	0.175185	0.0622814	0.174611	0.220161		0.128553	0.277768	0.167383	0.125815	0.213694	0.231982	0.158116	0.110035	0.208798	0.131133	0.47466

## Sheet: CID Profiles
	TEV											TEV Buffer											ICRF											ICRF+TEV
0	0.184759	0.326555	0.138784	0.0996429	0.122679	0.19076	0.248856	0.254614	0.148571	0.142386		0.162919	0.134873	0.113422	0.185058	0.180909	0.232302	0.158869	0.171444	0.19088	0.420429		0.397897	0.187402	0.219901	0.307189	0.391549	0.221286	0.18207	0.181324	0.313929	0.208312		0.133633	0.27332	0.193587	0.10701	0.230029	0.165804	0.222578	0.250779	0.196106	0.149116	0.615122
0.13	0.182242	0.329465	0.142862	0.217383	0.129936	0.199327	0.26673	0.268979	0.148118	0.138182		0.166175	0.150089	0.109321	0.223365	0.206968	0.249164	0.163218	0.18608	0.206687	0.374648		0.442802	0.199657	0.211994	0.383684	0.470671	0.234809	0.190577	0.1857	0.308456	0.256531		0.132146	0.274454	0.201826	0.103961	0.282258	0.172491	0.230402	0.229323	0.190829	0.150784	0.572775
0.26	0.19192	0.31383	0.137066	0.207583	0.1289	0.208391	0.246505	0.268779	0.149117	0.137577		0.177304	0.166413	0.116248	0.287241	0.224793	0.264863	0.166519	0.193393	0.224512	0.398011		0.471598	0.18778	0.206866	0.467633	0.50246	0.245355	0.180201	0.181233	0.307491	0.311001		0.138859	0.278525	0.191578	0.104787	0.302411	0.181871	0.253254	0.225275	0.196171	0.150535	0.553648
0.39	0.182212	0.310766	0.132013	0.205194	0.138705	0.215698	0.251656	0.284491	0.152753	0.126487		0.191052	0.181921	0.117521	0.388325	0.232671	0.288056	0.15914	0.200412	0.233721	0.411751		0.518334	0.194751	0.197424	0.512879	0.494235	0.270207	0.184187	0.225192	0.279429	0.367054		0.157247	0.294378	0.191857	0.101184	0.323389	0.176188	0.270536	0.228769	0.192905	0.142043	0.547362
0.52	0.185561	0.302456	0.143056	0.21244	0.136502	0.243446	0.277513	0.290506	0.15252	0.133884		0.204763	0.236093	0.11324	0.461853	0.222198	0.30378	0.159661	0.205744	0.251049	0.430287		0.560427	0.20349	0.206565	0.52129	0.51162	0.290982	0.187515	0.20512	0.285726	0.435759		0.163578	0.315426	0.189699	0.108581	0.323438	0.166085	0.260451	0.21952	0.210104	0.147012	0.574841
0.65	0.194445	0.306112	0.143016	0.213575	0.130908	0.255877	0.279598	0.289333	0.153719	0.135579		0.234306	0.290481	0.121136	0.460646	0.217279	0.309756	0.172347	0.239637	0.247062	0.458392		0.596126	0.19181	0.234954	0.48846	0.510934	0.328225	0.195176	0.194139	0.332584	0.496329		0.168576	0.329769	0.187415	0.110912	0.328696	0.162419	0.247822	0.225465	0.231733	0.14639	0.628255
0.78	0.185729	0.331369	0.153931	0.215468	0.133302	0.275678	0.244877	0.309568	0.155059	0.141728		0.269957	0.34535	0.128072	0.465704	0.253926	0.332131	0.160699	0.283996	0.237158	0.491298		0.586187	0.200177	0.314127	0.433764	0.46846	0.361552	0.200582	0.205249	0.380471	0.523067		0.1782	0.382753	0.179551	0.110842	0.372669	0.172473	0.233126	0.208486	0.252941	0.145081	0.675728
0.91	0.188152	0.329643	0.141828	0.207705	0.128805	0.261508	0.260976	0.33968	0.159953	0.140065		0.300299	0.419484	0.139675	0.487838	0.294787	0.368383	0.174616	0.326316	0.241453	0.512149		0.541696	0.216248	0.397992	0.402718	0.426922	0.366049	0.216467	0.20235	0.381576	0.502435		0.178612	0.431911	0.204197	0.109802	0.420325	0.170365	0.227067	0.219541	0.275172	0.143248	0.686686
1.04	0.191554	0.311608	0.151274	0.210312	0.137575	0.237682	0.264811	0.306446	0.155471	0.141171		0.31698	0.462804	0.153363	0.472529	0.324185	0.419495	0.178799	0.35696	0.247951	0.538657		0.529506	0.221595	0.462517	0.390141	0.423817	0.360709	0.221787	0.191812	0.360052	0.487895		0.156625	0.489906	0.213414	0.110915	0.428226	0.169263	0.232177	0.224385	0.253931	0.138854	0.711442
1.17	0.189182	0.321596	0.154701	0.207207	0.144291	0.218538	0.249376	0.307423	0.160083	0.146394		0.324553	0.503849	0.182778	0.412711	0.33041	0.458725	0.187812	0.376945	0.250743	0.530333		0.522201	0.235424	0.483919	0.375303	0.441869	0.368595	0.245556	0.179065	0.362914	0.50131		0.146621	0.523439	0.200274	0.109797	0.438615	0.171892	0.234348	0.233351	0.280338	0.137127	0.650201
1.3	0.199729	0.306062	0.164375	0.201013	0.148594	0.217647	0.225863	0.323332	0.160458	0.149295		0.331602	0.514836	0.222498	0.382813	0.335256	0.452506	0.168971	0.426445	0.261957	0.504538		0.517819	0.224807	0.485056	0.334268	0.458537	0.405526	0.259542	0.188426	0.428253	0.529269		0.14215	0.588659	0.185113	0.108484	0.455738	0.178163	0.227246	0.249151	0.304989	0.166713	0.565429
1.43	0.193884	0.283203	0.184652	0.205408	0.149299	0.222321	0.239786	0.311246	0.174077	0.145684		0.335841	0.53028	0.268027	0.368909	0.34312	0.44795	0.169095	0.490396	0.269276	0.473781		0.467845	0.228317	0.454556	0.291691	0.438872	0.42942	0.265697	0.220038	0.47408	0.555589		0.157492	0.66119	0.194572	0.113189	0.462534	0.178956	0.222262	0.251877	0.32345	0.197591	0.43995
1.56	0.184717	0.265999	0.195771	0.209029	0.154435	0.221618	0.248795	0.293933	0.172805	0.161129		0.342141	0.517397	0.309844	0.353222	0.324797	0.474621	0.195705	0.554226	0.28115	0.403185		0.411279	0.226901	0.402134	0.290889	0.395072	0.453174	0.244828	0.202905	0.49761	0.564639		0.163225	0.711005	0.189042	0.124004	0.44104	0.195521	0.244475	0.260311	0.281337	0.269521	0.384834
1.69	0.183414	0.26018	0.199278	0.204388	0.196538	0.230545	0.255748	0.299931	0.170803	0.158415		0.41416	0.521644	0.339895	0.338181	0.293936	0.496691	0.210144	0.558449	0.290371	0.387249		0.356881	0.225787	0.392545	0.276434	0.375912	0.472572	0.221746	0.245905	0.497541	0.532854		0.156392	0.716088	0.20466	0.132215	0.395457	0.216776	0.239037	0.2771	0.276453	0.320656	0.38999
1.82	0.213925	0.26365	0.210232	0.205599	0.225819	0.199096	0.249967	0.270934	0.180201	0.180133		0.478153	0.507075	0.347387	0.315852	0.261121	0.507883	0.216152	0.559827	0.292855	0.387738		0.318808	0.238103	0.397825	0.266251	0.323038	0.494016	0.261265	0.301488	0.502303	0.461455		0.156194	0.663756	0.235272	0.150162	0.361808	0.252994	0.267977	0.314424	0.280337	0.344693	0.383323
1.95	0.218425	0.260728	0.215836	0.202291	0.247824	0.190722	0.25176	0.281102	0.18687	0.201642		0.576234	0.431106	0.394669	0.27955	0.245588	0.528749	0.229544	0.556061	0.314978	0.397577		0.296026	0.248211	0.379853	0.269815	0.274078	0.535026	0.288749	0.328574	0.48448	0.391549		0.175597	0.603559	0.252831	0.174555	0.320926	0.311822	0.321099	0.352258	0.282547	0.333027	0.372556
2.08	0.220438	0.26206	0.222262	0.203765	0.248718	0.192504	0.248734	0.285945	0.190197	0.249478		0.630359	0.3337	0.456904	0.241339	0.227571	0.53775	0.239099	0.509446	0.349571	0.427419		0.280958	0.2379	0.349232	0.312895	0.244752	0.496054	0.334266	0.351021	0.429981	0.377103		0.208236	0.551019	0.280972	0.203372	0.298544	0.362307	0.392009	0.409824	0.32061	0.314965	0.365083
2.21	0.218251	0.274801	0.25495	0.215614	0.249513	0.190754	0.232902	0.280003	0.193926	0.290563		0.65127	0.261137	0.5364	0.204216	0.243312	0.513824	0.257885	0.493093	0.385151	0.420543		0.262573	0.241055	0.339398	0.354636	0.235824	0.422706	0.343205	0.372431	0.351549	0.362363		0.226064	0.518454	0.330706	0.233955	0.289544	0.421603	0.449625	0.469064	0.356867	0.317168	0.315695
2.34	0.198955	0.277766	0.296363	0.234064	0.261257	0.192228	0.230083	0.297972	0.21959	0.312508		0.636672	0.211976	0.592554	0.187906	0.281743	0.474691	0.30505	0.48233	0.418643	0.372532		0.228599	0.24071	0.344835	0.358289	0.23475	0.397713	0.320482	0.359124	0.299647	0.361396		0.232545	0.487661	0.378945	0.242579	0.259684	0.468081	0.469684	0.529064	0.405339	0.3442	0.299352
2.47	0.189723	0.280492	0.33763	0.239467	0.304135	0.189042	0.219577	0.282981	0.254316	0.331801		0.618268	0.193093	0.556866	0.170606	0.321883	0.431349	0.322671	0.482339	0.455187	0.344632		0.201034	0.257583	0.336352	0.347012	0.229515	0.383902	0.293726	0.293355	0.255996	0.368498		0.220174	0.439663	0.400069	0.247715	0.234759	0.529309	0.460263	0.568876	0.446068	0.392875	0.286193
2.6	0.205918	0.336623	0.363951	0.26437	0.321982	0.221962	0.219754	0.29225	0.263117	0.337963		0.570489	0.176751	0.464361	0.150777	0.374334	0.38642	0.357661	0.461014	0.482771	0.353167		0.194321	0.268524	0.346444	0.334334	0.193683	0.347509	0.301493	0.265104	0.225871	0.377549		0.221269	0.419047	0.418094	0.256328	0.224546	0.558626	0.431159	0.58292	0.492488	0.421826	0.255389
2.73	0.213158	0.386011	0.410074	0.271919	0.349333	0.233021	0.240233	0.32271	0.284236	0.348289		0.524686	0.159833	0.402877	0.140503	0.40373	0.332825	0.393105	0.43562	0.51893	0.326326		0.187059	0.262591	0.351625	0.352259	0.174163	0.309667	0.325338	0.246714	0.197926	0.37348		0.226329	0.39021	0.44898	0.274811	0.223628	0.52275	0.412647	0.6205	0.533985	0.431814	0.242618
2.86	0.211629	0.434728	0.466368	0.293545	0.369734	0.250557	0.24034	0.363376	0.290711	0.331697		0.484944	0.156386	0.380105	0.132468	0.419427	0.311483	0.459073	0.394436	0.631025	0.278667		0.198118	0.268097	0.34191	0.352323	0.160114	0.269744	0.349127	0.229834	0.196157	0.334136		0.24454	0.36616	0.473643	0.30964	0.227923	0.485155	0.424027	0.629973	0.547378	0.436585	0.235962
2.99	0.209729	0.442724	0.481318	0.310997	0.400163	0.263745	0.228623	0.408199	0.304482	0.336549		0.427343	0.153708	0.36445	0.124636	0.435576	0.276456	0.503475	0.365877	0.675853	0.254181		0.20936	0.284419	0.319873	0.33183	0.157429	0.245693	0.366556	0.253958	0.180491	0.281586		0.250366	0.343143	0.476758	0.324042	0.255026	0.45365	0.474807	0.592785	0.499769	0.409879	0.21359
3.12	0.213712	0.478132	0.442569	0.349422	0.423288	0.276069	0.2552	0.447191	0.341086	0.342259		0.404046	0.166655	0.345348	0.117347	0.430027	0.256394	0.554123	0.340526	0.692996	0.234182		0.199995	0.289173	0.295762	0.281264	0.150703	0.228885	0.397582	0.323601	0.176572	0.252802		0.230697	0.347455	0.484576	0.347613	0.26915	0.395777	0.472559	0.546144	0.490147	0.367731	0.206592
3.25	0.24711	0.502395	0.443458	0.384194	0.44208	0.27546	0.259117	0.480019	0.391736	0.324121		0.400804	0.202649	0.303985	0.1098	0.405704	0.252589	0.575126	0.356341	0.669096	0.231651		0.184396	0.321905	0.257155	0.248683	0.150947	0.210883	0.428365	0.386682	0.168911	0.236389		0.228208	0.330676	0.497485	0.409523	0.252869	0.374977	0.413135	0.540389	0.448184	0.399952	0.18728
3.38	0.285401	0.4971	0.451401	0.448275	0.44251	0.277661	0.240601	0.524919	0.435579	0.30151		0.393011	0.212941	0.270252	0.108101	0.387889	0.246133	0.607689	0.355917	0.594995	0.211582		0.1668	0.364886	0.226914	0.236962	0.143476	0.220435	0.403075	0.45821	0.16762	0.22593		0.23118	0.324879	0.496879	0.429457	0.230541	0.40441	0.362779	0.4942	0.396589	0.420358	0.196008
3.51	0.323947	0.503312	0.474938	0.468552	0.451935	0.291487	0.263754	0.553649	0.453662	0.293015		0.354653	0.201958	0.253961	0.102359	0.3701	0.25724	0.627896	0.346806	0.492936	0.207073		0.153405	0.405387	0.207986	0.228583	0.132788	0.221007	0.365708	0.534572	0.162459	0.207073		0.253753	0.3236	0.489097	0.423394	0.198883	0.403525	0.350378	0.422192	0.351013	0.407856	0.18663
3.64	0.296685	0.507553	0.498317	0.46238	0.448947	0.300014	0.319253	0.583621	0.471017	0.335056		0.343523	0.179188	0.250051	0.100376	0.333511	0.249512	0.612242	0.319655	0.429632	0.210781		0.1441	0.44042	0.186659	0.2224	0.123769	0.213189	0.334392	0.537593	0.161515	0.204899		0.266618	0.310281	0.454492	0.438453	0.182506	0.379257	0.347316	0.385323	0.3496	0.373757	0.173521
3.77	0.265083	0.515478	0.499789	0.445535	0.422368	0.305382	0.333061	0.594404	0.514586	0.35762		0.319939	0.156875	0.220108	0.095417	0.299426	0.212554	0.556322	0.306837	0.373093	0.214491		0.141723	0.421175	0.177041	0.209746	0.123003	0.23038	0.34355	0.518158	0.14801	0.193195		0.30986	0.310538	0.461417	0.425314	0.163534	0.347034	0.350627	0.388594	0.364466	0.335808	0.196427
3.9	0.243362	0.515786	0.49224	0.491008	0.381177	0.298883	0.358735	0.600425	0.583615	0.361203		0.287493	0.143891	0.178097	0.0908772	0.29576	0.200826	0.48275	0.310954	0.324893	0.195832		0.130275	0.416994	0.160065	0.183176	0.117503	0.222934	0.374903	0.505181	0.153491	0.202784		0.3449	0.279676	0.443243	0.39463	0.155735	0.322043	0.351498	0.38671	0.380314	0.276008	0.179829
4.03	0.259348	0.512995	0.47832	0.522622	0.338643	0.315883	0.416992	0.603479	0.619154	0.347853		0.268534	0.134847	0.159453	0.0877651	0.292944	0.177009	0.420627	0.294664	0.292733	0.196109		0.123414	0.461641	0.145404	0.180803	0.119328	0.223441	0.376136	0.517242	0.154591	0.197345		0.36935	0.272455	0.43422	0.370847	0.154251	0.291711	0.355707	0.351515	0.377921	0.243643	0.187232
4.16	0.26396	0.490325	0.4556	0.565181	0.304692	0.329522	0.462944	0.688408	0.637474	0.339089		0.228076	0.127841	0.14235	0.0985045	0.289117	0.177948	0.359866	0.273555	0.258402	0.176382		0.122101	0.554812	0.14545	0.178745	0.10941	0.21919	0.320867	0.525014	0.132235	0.191419		0.381221	0.251073	0.412516	0.327197	0.152978	0.263901	0.344625	0.337474	0.371791	0.223524	0.174528
4.29	0.270573	0.481789	0.423219	0.573138	0.292734	0.332897	0.544013	0.740193	0.625782	0.338184		0.221296	0.123639	0.138208	0.0871257	0.27034	0.157171	0.304022	0.255018	0.242401	0.175008		0.109513	0.610308	0.138592	0.179304	0.0919863	0.201367	0.262186	0.535718	0.122145	0.173187		0.375748	0.246958	0.388594	0.292842	0.149649	0.240653	0.386865	0.318476	0.373626	0.221324	0.163912
4.42	0.291345	0.438448	0.399888	0.530539	0.302275	0.343301	0.606	0.706128	0.618626	0.344023		0.225747	0.125565	0.138011	0.092818	0.264386	0.138581	0.267096	0.255021	0.218025	0.18965		0.108525	0.564214	0.128385	0.177495	0.0969559	0.187226	0.245954	0.438658	0.111698	0.166088		0.375348	0.24286	0.344553	0.254636	0.147386	0.214842	0.378626	0.273444	0.371523	0.206845	0.173376
4.55	0.291442	0.414439	0.349548	0.480966	0.312818	0.351165	0.666702	0.630387	0.571606	0.326813		0.201807	0.120997	0.131209	0.090324	0.246747	0.138494	0.227578	0.259185	0.226258	0.180836		0.110793	0.520836	0.140627	0.17283	0.0966615	0.17107	0.230305	0.350051	0.11088	0.182603		0.403915	0.234734	0.323369	0.210645	0.137569	0.197796	0.356476	0.25364	0.346965	0.186623	0.159691
4.68	0.31255	0.450723	0.330744	0.470002	0.342333	0.347199	0.691595	0.55542	0.540693	0.333295		0.197101	0.117532	0.128195	0.0858662	0.233823	0.147721	0.207559	0.240943	0.227376	0.182584		0.110434	0.486284	0.142318	0.155159	0.0966464	0.167006	0.190656	0.259765	0.102873	0.183742		0.467588	0.241189	0.275468	0.186724	0.13899	0.19849	0.292707	0.245111	0.330865	0.17469	0.16359
4.81	0.358938	0.448851	0.370458	0.477679	0.379651	0.398879	0.758902	0.51781	0.502386	0.357956		0.187988	0.114219	0.117702	0.0873528	0.220826	0.136608	0.194078	0.234665	0.218144	0.186002		0.114121	0.421808	0.145591	0.149829	0.0946805	0.16537	0.199815	0.250406	0.101501	0.175581		0.460373	0.218417	0.243823	0.178615	0.12599	0.172324	0.251639	0.226146	0.314757	0.157443	0.15983
4.94	0.387923	0.454596	0.399089	0.441802	0.414832	0.435578	0.7407	0.522688	0.469404	0.36419		0.17253	0.115935	0.114613	0.0818703	0.227077	0.132966	0.186275	0.216616	0.215062	0.185083		0.101798	0.34071	0.134544	0.142835	0.0959731	0.146972	0.207649	0.243713	0.105341	0.174365		0.449667	0.219267	0.226034	0.173735	0.134162	0.180338	0.223636	0.216942	0.287121	0.146899	0.162942
5.07	0.415505	0.461883	0.388468	0.411202	0.430718	0.410968	0.74788	0.482021	0.439443	0.363617		0.168371	0.104897	0.10967	0.0846788	0.230115	0.137875	0.188484	0.213132	0.203808	0.18748		0.110145	0.312425	0.121945	0.132973	0.0926816	0.147572	0.20022	0.217838	0.0917071	0.150677		0.456212	0.217023	0.222842	0.173885	0.139371	0.167548	0.206487	0.195741	0.281548	0.144849	0.160574
5.2	0.392654	0.42586	0.409532	0.412943	0.439185	0.381143	0.776798	0.437857	0.387692	0.337968		0.16834	0.109718	0.11294	0.0773696	0.224032	0.138988	0.181804	0.190357	0.205905	0.188992		0.108141	0.291672	0.112559	0.128612	0.0986464	0.145332	0.20304	0.209975	0.0914736	0.126581		0.483458	0.214621	0.223202	0.170017	0.132543	0.16911	0.190685	0.182691	0.285047	0.140936	0.160503
5.33	0.369206	0.39515	0.428933	0.391083	0.468902	0.328743	0.774188	0.384485	0.348087	0.346		0.171322	0.114195	0.0987165	0.0793269	0.21616	0.151365	0.176842	0.189302	0.205423	0.179066		0.100349	0.286382	0.110632	0.128446	0.0952895	0.131366	0.23366	0.220851	0.0955057	0.119975		0.455441	0.202757	0.222257	0.159645	0.130579	0.182089	0.196534	0.182309	0.272538	0.142651	0.150115
5.46	0.368403	0.374369	0.414676	0.360991	0.490409	0.307873	0.705443	0.373538	0.335745	0.371164		0.148985	0.112865	0.10522	0.0763816	0.196474	0.145496	0.17291	0.172999	0.205442	0.179294		0.098363	0.308579	0.10842	0.122191	0.095272	0.131229	0.212804	0.23297	0.0863047	0.11776		0.439085	0.206645	0.211848	0.142851	0.129229	0.16197	0.192758	0.175095	0.259763	0.154775	0.148986
5.59	0.380305	0.381061	0.403333	0.333189	0.456677	0.280964	0.697437	0.397897	0.333766	0.416269		0.152764	0.106882	0.106074	0.0818934	0.176055	0.131312	0.178292	0.176972	0.197566	0.184523		0.097226	0.300472	0.104589	0.123811	0.0901106	0.12938	0.200251	0.262268	0.0963861	0.109682		0.415391	0.217948	0.209042	0.1201	0.134379	0.163658	0.203661	0.173617	0.25368	0.157779	0.160742
5.72	0.370369	0.354981	0.365629	0.309639	0.410488	0.264208	0.623502	0.379363	0.329635	0.453669		0.146202	0.110655	0.10342	0.0828699	0.156789	0.124884	0.172264	0.17316	0.201786	0.178547		0.0936509	0.288211	0.101536	0.124838	0.092515	0.125428	0.20037	0.231584	0.0904472	0.10485		0.392325	0.206157	0.194682	0.118543	0.129431	0.170763	0.192345	0.166617	0.259776	0.164894	0.141967
5.85	0.406356	0.334439	0.340187	0.283724	0.378479	0.249522	0.584826	0.355927	0.304221	0.438258		0.143354	0.112154	0.106828	0.0815436	0.156964	0.123973	0.175755	0.169011	0.189715	0.179828		0.103155	0.263587	0.101814	0.119625	0.0897252	0.124904	0.212895	0.230875	0.0861282	0.0977974		0.344987	0.202945	0.209854	0.116935	0.128949	0.165269	0.19393	0.146326	0.272574	0.161465	0.152456
5.98	0.416531	0.323048	0.34503	0.275528	0.360698	0.212074	0.597904	0.367427	0.27389	0.406457		0.13828	0.117425	0.118591	0.0764229	0.1615	0.135343	0.168491	0.169553	0.190805	0.172719		0.11147	0.256095	0.0889978	0.118081	0.0857581	0.118703	0.200793	0.217647	0.0924201	0.107637		0.315024	0.20548	0.209955	0.119818	0.133124	0.165196	0.181698	0.150555	0.271273	0.146169	0.149715
6.11	0.473646	0.307948	0.353255	0.255989	0.363268	0.203126	0.574123	0.353169	0.263183	0.401181		0.129324	0.118847	0.118698	0.0797398	0.156034	0.134118	0.161164	0.164562	0.186405	0.163151		0.104855	0.253109	0.090063	0.116201	0.0860956	0.120194	0.193794	0.195403	0.0920089	0.104503		0.311203	0.202109	0.194141	0.111521	0.126495	0.160356	0.186081	0.153233	0.270958	0.148298	0.143927
6.24	0.55495	0.317865	0.362519	0.249069	0.378439	0.189773	0.555091	0.352481	0.273536	0.397538		0.136901	0.109455	0.108804	0.0813576	0.146345	0.133943	0.170285	0.159041	0.191309	0.170238		0.104639	0.250751	0.100674	0.110114	0.0834727	0.119866	0.203745	0.202841	0.0837121	0.0917403		0.295298	0.200922	0.17665	0.113702	0.12189	0.166923	0.203666	0.166541	0.280889	0.131488	0.132822
6.37	0.610045	0.307876	0.377765	0.223982	0.374112	0.208845	0.505731	0.294296	0.260764	0.368984		0.136551	0.107402	0.109865	0.0759858	0.149721	0.128268	0.146325	0.145157	0.185684	0.167862		0.0972702	0.277388	0.0966527	0.111776	0.0937512	0.115201	0.204498	0.192026	0.0830429	0.0915506		0.286142	0.199655	0.191659	0.110646	0.12911	0.168733	0.198981	0.161528	0.28662	0.130193	0.130382
6.5	0.608562	0.330914	0.368268	0.230732	0.381157	0.209287	0.487772	0.324306	0.22435	0.341504		0.141002	0.111658	0.100398	0.0752036	0.147905	0.118519	0.150973	0.14166	0.17852	0.178217		0.0958586	0.252452	0.0984279	0.121596	0.0892519	0.118642	0.201128	0.19331	0.0802586	0.0879721		0.267764	0.201368	0.193612	0.108316	0.12276	0.165121	0.190502	0.156128	0.282914	0.143582	0.130916
6.63	0.587491	0.348258	0.344147	0.229637	0.375676	0.231764	0.485089	0.311242	0.209887	0.318234		0.135146	0.113694	0.105645	0.0727446	0.144236	0.121305	0.150689	0.142515	0.181759	0.174237		0.102767	0.262178	0.0852138	0.122288	0.0824259	0.122542	0.18411	0.183764	0.0849389	0.0864445		0.271752	0.205877	0.173547	0.110187	0.121214	0.16449	0.182169	0.144456	0.270172	0.154278	0.134469
6.76	0.592223	0.342065	0.33287	0.249124	0.348053	0.244066	0.465587	0.294666	0.190527	0.287606		0.135934	0.110733	0.10871	0.072012	0.141709	0.126062	0.154725	0.151213	0.183559	0.160852		0.0990583	0.264477	0.0870296	0.124478	0.0935584	0.11584	0.206678	0.192551	0.0792785	0.0842689		0.273159	0.2088	0.179801	0.110866	0.122727	0.169361	0.194457	0.147223	0.268469	0.135532	0.14133
6.89	0.59418	0.335552	0.29683	0.244417	0.336727	0.251795	0.474703	0.25386	0.189894	0.265772		0.141927	0.11142	0.0972024	0.0760175	0.142314	0.122878	0.169242	0.143278	0.179553	0.17028		0.0953295	0.273139	0.0872339	0.118659	0.0909724	0.117388	0.191074	0.180271	0.0829377	0.0963664		0.255795	0.201574	0.196186	0.110752	0.123681	0.180586	0.185258	0.148686	0.268773	0.135171	0.128922
7.02	0.593068	0.337868	0.283268	0.243113	0.34158	0.270723	0.449182	0.260295	0.206981	0.264644		0.141435	0.108689	0.0909777	0.0710472	0.136003	0.127412	0.153775	0.149455	0.194928	0.182839		0.0883976	0.268739	0.0944205	0.120124	0.0925457	0.117019	0.190326	0.179348	0.0821746	0.0862971		0.225505	0.198866	0.185927	0.107868	0.121998	0.174375	0.187895	0.146785	0.255863	0.13954	0.13361
7.15	0.58918	0.335387	0.272034	0.241628	0.333347	0.26807	0.477969	0.277155	0.206188	0.262464		0.130087	0.10667	0.103895	0.0695903	0.149376	0.123474	0.151387	0.133851	0.177547	0.175214		0.095748	0.26434	0.0844885	0.117924	0.0819072	0.112981	0.194874	0.161617	0.0795491	0.0845695		0.203905	0.20261	0.200145	0.115679	0.123933	0.171199	0.196116	0.14136	0.245002	0.144999	0.133871
7.28	0.60587	0.349762	0.281595	0.220576	0.305566	0.254903	0.445014	0.26311	0.200875	0.272828		0.125607	0.108895	0.113289	0.0693163	0.14507	0.122558	0.158179	0.130507	0.186532	0.171151		0.0989066	0.27861	0.0794767	0.118368	0.0857957	0.113512	0.193762	0.164849	0.0829286	0.0930973		0.196922	0.19578	0.212292	0.108061	0.120998	0.16706	0.20045	0.138474	0.244924	0.148378	0.140397
7.41	0.617845	0.369365	0.28675	0.215649	0.280211	0.223575	0.428716	0.278602	0.194915	0.279612		0.12542	0.106643	0.11562	0.0695161	0.138394	0.126817	0.158676	0.135436	0.188499	0.157001		0.0957337	0.273983	0.0820915	0.120355	0.0894207	0.114492	0.205467	0.195972	0.0835552	0.0920966		0.181465	0.20812	0.199092	0.105164	0.118502	0.165482	0.193231	0.138388	0.241341	0.14401	0.136078
7.54	0.665133	0.36468	0.274088	0.215861	0.263316	0.2128	0.458812	0.294871	0.191793	0.275697		0.126481	0.112068	0.10873	0.076339	0.133517	0.12803	0.158793	0.142006	0.182539	0.16737		0.0920051	0.275216	0.0857047	0.120981	0.0904267	0.109903	0.215363	0.190601	0.0773263	0.08927		0.165983	0.202939	0.201253	0.10998	0.111884	0.167532	0.196903	0.145951	0.232481	0.136047	0.126446
7.67	0.702291	0.342036	0.299072	0.220554	0.253749	0.21628	0.416247	0.295791	0.190641	0.281878		0.129156	0.110719	0.0999496	0.0706422	0.140034	0.121369	0.170483	0.141078	0.187534	0.158696		0.0941654	0.263171	0.086508	0.119799	0.086574	0.114753	0.228957	0.17677	0.0863243	0.0956911		0.159458	0.204993	0.210163	0.110388	0.114682	0.168185	0.193596	0.150381	0.239689	0.139709	0.123792
7.8	0.710987	0.340712	0.291372	0.214518	0.267724	0.222696	0.421846	0.306416	0.182144	0.284313		0.129255	0.109519	0.0977558	0.0704346	0.134552	0.124653	0.161376	0.137984	0.175319	0.161729		0.0955943	0.277829	0.0873797	0.117215	0.0964153	0.117605	0.218833	0.172294	0.0848895	0.0916799		0.149411	0.202832	0.199764	0.1083	0.109833	0.164772	0.195562	0.156208	0.231869	0.14174	0.13763
7.93	0.711981	0.347855	0.302566	0.221766	0.257769	0.217928	0.42149	0.301728	0.181185	0.274989		0.12402	0.112006	0.0998121	0.0691363	0.137907	0.129172	0.151907	0.131565	0.183451	0.160623		0.0949224	0.278555	0.0819538	0.122596	0.09856	0.120754	0.213137	0.159532	0.0757952	0.093807		0.152285	0.205129	0.210453	0.109043	0.111133	0.171008	0.190662	0.147614	0.241848	0.141215	0.133322
8.06	0.704888	0.355048	0.301702	0.220012	0.272394	0.246371	0.418219	0.346595	0.19265	0.280534		0.131177	0.109601	0.105609	0.0735641	0.134247	0.130651	0.153941	0.135784	0.184484	0.149384		0.0990567	0.280753	0.082151	0.121516	0.0922189	0.124303	0.209061	0.162586	0.0919015	0.0797279		0.156011	0.195255	0.19935	0.1081	0.111314	0.171712	0.193998	0.142646	0.220831	0.149699	0.130187
8.19	0.689829	0.374358	0.314746	0.225848	0.274447	0.271947	0.4096	0.361108	0.1839	0.292103		0.134145	0.109194	0.101122	0.0757367	0.130292	0.12662	0.160237	0.124278	0.184246	0.160971		0.10497	0.304432	0.0795409	0.129335	0.0977084	0.118113	0.219014	0.171299	0.0841299	0.0847664		0.162371	0.203118	0.187406	0.11302	0.109373	0.186875	0.185855	0.146786	0.219785	0.152018	0.14301
8.32	0.617522	0.383013	0.277961	0.215091	0.28727	0.303326	0.409479	0.3697	0.194665	0.323752		0.130672	0.108865	0.097164	0.0825891	0.123887	0.131692	0.161255	0.122032	0.188158	0.149564		0.0945071	0.314793	0.0861225	0.124949	0.100499	0.118205	0.261227	0.1529	0.0773793	0.0921279		0.161837	0.197803	0.198991	0.115088	0.108061	0.172914	0.185118	0.143242	0.223699	0.150835	0.128587
8.45	0.577285	0.37923	0.281734	0.225205	0.298619	0.339713	0.424614	0.345047	0.208491	0.309968		0.138073	0.121321	0.103949	0.0759212	0.129385	0.133356	0.15592	0.145111	0.18944	0.152918		0.105243	0.264084	0.0883433	0.121299	0.0863819	0.123093	0.256964	0.16481	0.0806705	0.0929781		0.181655	0.194531	0.203907	0.108295	0.116461	0.163589	0.183933	0.136886	0.204248	0.164583	0.125421
8.58	0.557317	0.379958	0.27888	0.257407	0.311976	0.372189	0.418574	0.33275	0.236241	0.300617		0.12995	0.124289	0.106692	0.0747375	0.122122	0.133056	0.163637	0.140111	0.183042	0.144628		0.0998204	0.243888	0.0822362	0.113014	0.0952727	0.115547	0.237258	0.175105	0.083097	0.0869245		0.198673	0.19083	0.207944	0.112127	0.109652	0.165945	0.204434	0.144615	0.211019	0.161412	0.136624
8.71	0.547042	0.370921	0.306062	0.263542	0.314854	0.380763	0.441461	0.33985	0.249221	0.306669		0.125573	0.120321	0.107809	0.0784316	0.130422	0.139073	0.16781	0.132103	0.179197	0.131113		0.10682	0.228994	0.0844491	0.120418	0.0984829	0.116901	0.242273	0.169978	0.0820639	0.0899715		0.248214	0.197544	0.198076	0.121045	0.105924	0.158125	0.212138	0.150878	0.201801	0.164014	0.142983
8.84	0.534691	0.38536	0.338487	0.288744	0.304923	0.387764	0.46873	0.31894	0.241801	0.317502		0.133802	0.11892	0.108128	0.0743994	0.131803	0.132775	0.159526	0.132602	0.188197	0.144213		0.0923732	0.240307	0.0870201	0.12886	0.0954198	0.114959	0.254355	0.145363	0.078643	0.0911073		0.294977	0.19167	0.210825	0.113864	0.111549	0.172369	0.222033	0.149726	0.205074	0.168993	0.151603
8.97	0.533703	0.383661	0.376613	0.296677	0.291322	0.385227	0.461127	0.297905	0.235891	0.35628		0.127686	0.114259	0.104417	0.075495	0.129016	0.125005	0.158571	0.126458	0.180226	0.15697		0.0966964	0.244788	0.0844732	0.132259	0.0930318	0.119181	0.246259	0.160991	0.0739379	0.0935138		0.33297	0.188475	0.20424	0.119249	0.111696	0.180954	0.220896	0.147725	0.215525	0.164589	0.144124
9.1	0.547899	0.371995	0.404776	0.283233	0.280486	0.357861	0.491301	0.284066	0.237696	0.405625		0.134797	0.119737	0.100861	0.07798	0.133174	0.13191	0.166777	0.13822	0.184787	0.151049		0.0987328	0.236754	0.0946321	0.127932	0.0918224	0.120576	0.241008	0.172718	0.0798256	0.099371		0.354559	0.186992	0.193057	0.12481	0.115874	0.170322	0.210178	0.154888	0.207125	0.163626	0.150104
9.23	0.543696	0.367239	0.424619	0.292151	0.267339	0.357049	0.560318	0.306398	0.243826	0.423038		0.142906	0.118181	0.0998625	0.078523	0.140695	0.120995	0.169287	0.13369	0.182758	0.150188		0.0946906	0.221707	0.0977326	0.134899	0.0933455	0.119206	0.235295	0.175391	0.0818152	0.0979919		0.370624	0.188639	0.208667	0.124339	0.110736	0.162079	0.205192	0.153421	0.20562	0.169776	0.152773
9.36	0.526488	0.365614	0.443662	0.300592	0.275368	0.363342	0.588248	0.300519	0.259162	0.415641		0.149596	0.109254	0.100229	0.079444	0.141032	0.119909	0.169348	0.142146	0.188436	0.140682		0.0957225	0.238211	0.0959507	0.150967	0.0965996	0.12169	0.246523	0.170624	0.0897626	0.0974923		0.383674	0.195899	0.217329	0.131216	0.110767	0.16987	0.214011	0.166906	0.213034	0.166064	0.154597
9.49	0.512982	0.378562	0.466804	0.330995	0.293461	0.382533	0.606775	0.361084	0.271869	0.409303		0.143825	0.114351	0.0986248	0.0896017	0.137195	0.122703	0.175068	0.143466	0.185776	0.151036		0.0956373	0.245387	0.0939318	0.164294	0.0940566	0.128008	0.239646	0.190612	0.0914553	0.101932		0.379259	0.197481	0.236687	0.133103	0.11343	0.166866	0.204796	0.157011	0.21497	0.172565	0.146185
9.62	0.499626	0.404936	0.502862	0.3422	0.311791	0.364646	0.617604	0.373276	0.282036	0.406946		0.139369	0.117486	0.0980741	0.0855581	0.13578	0.128354	0.17889	0.14283	0.198114	0.151446		0.0948011	0.257903	0.0855663	0.154563	0.099335	0.124104	0.24415	0.199126	0.0875598	0.108019		0.360658	0.192774	0.234604	0.138709	0.109907	0.183851	0.226463	0.166715	0.233132	0.181298	0.15551
9.75	0.492235	0.437142	0.509623	0.343787	0.316904	0.352176	0.621405	0.366461	0.305184	0.41416		0.144041	0.11966	0.105792	0.0800736	0.134997	0.122672	0.184426	0.142849	0.220606	0.153143		0.0985289	0.285741	0.0881636	0.158416	0.095848	0.129352	0.253007	0.182638	0.103418	0.0990251		0.35254	0.200149	0.258297	0.140911	0.114527	0.176733	0.235032	0.17461	0.22337	0.167154	0.167153
9.88	0.461064	0.510223	0.503699	0.360346	0.318606	0.325261	0.647931	0.410241	0.345761	0.421914		0.155238	0.120097	0.101559	0.0830201	0.138281	0.139197	0.193239	0.148406	0.226662	0.155184		0.104734	0.288953	0.0917975	0.16446	0.0998017	0.134662	0.252009	0.186077	0.0997753	0.105237		0.372737	0.191619	0.263121	0.150206	0.116115	0.174155	0.224339	0.176693	0.223223	0.172967	0.169519
10.01	0.47445	0.543451	0.479687	0.375901	0.343105	0.290384	0.627166	0.416405	0.373272	0.400446		0.15371	0.123491	0.104957	0.0874837	0.143759	0.133709	0.221111	0.153303	0.238732	0.163137		0.0963293	0.283257	0.0968541	0.171752	0.0954816	0.132205	0.235991	0.197754	0.0947181	0.109279		0.418768	0.193735	0.260601	0.158606	0.127057	0.178695	0.230304	0.176126	0.246569	0.191176	0.176621
10.14	0.500887	0.568926	0.443358	0.412723	0.387259	0.297304	0.621329	0.439655	0.373801	0.385871		0.150459	0.125896	0.112084	0.0929559	0.143668	0.136543	0.228374	0.153884	0.241328	0.163686		0.107017	0.280248	0.102566	0.183662	0.0978177	0.131853	0.214304	0.190273	0.0953691	0.110945		0.47289	0.214594	0.283363	0.182233	0.118921	0.177343	0.241484	0.193437	0.250475	0.199468	0.172366
10.27	0.522675	0.606561	0.437038	0.45807	0.414799	0.301449	0.606191	0.43252	0.359302	0.382735		0.156713	0.120126	0.109028	0.0916594	0.153272	0.143165	0.253036	0.158128	0.24617	0.166364		0.110985	0.341147	0.112113	0.19495	0.106266	0.137107	0.214102	0.20501	0.108853	0.114799		0.509339	0.214794	0.305188	0.212322	0.126365	0.181257	0.264727	0.202419	0.267998	0.209625	0.173519
10.4	0.522994	0.579348	0.459627	0.51983	0.426843	0.34303	0.574853	0.44564	0.349523	0.383562		0.161976	0.117173	0.120623	0.0909588	0.178437	0.143322	0.237243	0.163217	0.234175	0.167599		0.100219	0.36575	0.121635	0.185777	0.112746	0.151116	0.235432	0.20946	0.11561	0.134		0.467897	0.198914	0.332271	0.251177	0.138004	0.190922	0.271573	0.220055	0.279583	0.226115	0.170889
10.53	0.570278	0.520413	0.45526	0.547356	0.421513	0.376547	0.560367	0.480473	0.362322	0.352234		0.164537	0.125486	0.121054	0.0969134	0.191922	0.145762	0.237955	0.169746	0.232863	0.168456		0.102358	0.392682	0.118161	0.190408	0.125288	0.160288	0.259459	0.241443	0.12167	0.143138		0.409222	0.199533	0.397384	0.280069	0.133747	0.185956	0.294323	0.247208	0.289626	0.254917	0.159368
10.66	0.552141	0.498039	0.455513	0.5552	0.402038	0.394612	0.542889	0.486232	0.367116	0.341156		0.173287	0.125175	0.125042	0.096567	0.209843	0.154679	0.240239	0.187442	0.248728	0.156717		0.110243	0.41584	0.129749	0.198908	0.123059	0.176834	0.281522	0.252321	0.125861	0.169303		0.363827	0.197352	0.426573	0.296191	0.131802	0.189695	0.301734	0.275212	0.315924	0.311219	0.159971
10.79	0.512391	0.446544	0.424232	0.527644	0.376941	0.418807	0.531217	0.476222	0.363333	0.342872		0.176436	0.123412	0.132923	0.100111	0.226904	0.166681	0.254251	0.198286	0.274446	0.161502		0.115369	0.412921	0.143534	0.199587	0.119383	0.204236	0.273812	0.264524	0.122296	0.168191		0.327037	0.197112	0.413625	0.342416	0.139653	0.20688	0.321928	0.315703	0.374024	0.337686	0.167918
10.92	0.45829	0.466381	0.438248	0.505495	0.347663	0.450537	0.506889	0.462684	0.353427	0.339169		0.179069	0.119482	0.160664	0.107556	0.247283	0.176473	0.28604	0.212916	0.281719	0.177422		0.121574	0.428572	0.149078	0.202277	0.126495	0.217672	0.248856	0.29866	0.131198	0.151508		0.269377	0.20494	0.439432	0.417366	0.149702	0.224322	0.326518	0.392876	0.40733	0.332639	0.192749
11.05	0.45435	0.458569	0.43378	0.471617	0.352597	0.433212	0.451339	0.42459	0.3629	0.337987		0.192239	0.124712	0.18136	0.104795	0.262444	0.187461	0.312894	0.210139	0.259212	0.161485		0.121644	0.450808	0.150392	0.211201	0.141448	0.23117	0.271624	0.339096	0.132602	0.143125		0.240946	0.217714	0.442456	0.466903	0.166292	0.237852	0.301428	0.457637	0.427538	0.29982	0.177637
11.18	0.400203	0.470345	0.417399	0.445141	0.356953	0.417967	0.426663	0.402184	0.366381	0.342128		0.195304	0.123511	0.220869	0.104088	0.313053	0.202152	0.31744	0.220158	0.261108	0.174825		0.131692	0.465668	0.153878	0.216252	0.145025	0.239833	0.27869	0.393711	0.13834	0.147527		0.219354	0.224725	0.474543	0.502543	0.176645	0.259511	0.298689	0.513482	0.453365	0.292376	0.17318
11.31	0.353473	0.5042	0.358104	0.38265	0.375723	0.399052	0.399824	0.375235	0.385063	0.350668		0.210291	0.133025	0.252124	0.109661	0.375673	0.212159	0.335001	0.222027	0.287306	0.170231		0.142888	0.472711	0.173896	0.215232	0.130245	0.251315	0.305692	0.456652	0.150437	0.155318		0.19822	0.225855	0.467505	0.541619	0.191568	0.288854	0.324783	0.545702	0.450521	0.306479	0.175458
11.44	0.333335	0.53052	0.314223	0.358083	0.384498	0.410541	0.393505	0.353392	0.3715	0.353568		0.214039	0.151973	0.262893	0.121344	0.427074	0.225433	0.318719	0.234656	0.306564	0.183378		0.13939	0.444619	0.213475	0.228056	0.1285	0.243274	0.373729	0.498692	0.15232	0.160612		0.190762	0.237128	0.466609	0.565481	0.212422	0.338493	0.36535	0.561486	0.462933	0.343432	0.184823
11.57	0.340098	0.539129	0.303739	0.383081	0.385789	0.370461	0.361958	0.362626	0.363147	0.346036		0.250499	0.173481	0.246812	0.118646	0.429973	0.255835	0.330904	0.246537	0.347206	0.189687		0.149991	0.431202	0.215266	0.227586	0.128849	0.2491	0.414322	0.56744	0.15353	0.175033		0.181903	0.230841	0.501382	0.545684	0.215421	0.431261	0.382846	0.608173	0.482173	0.33895	0.194088
11.7	0.313774	0.508325	0.310406	0.379591	0.384065	0.331931	0.360316	0.34584	0.383796	0.34344		0.297724	0.184234	0.232426	0.122725	0.402249	0.287362	0.353411	0.274376	0.438841	0.184923		0.152277	0.427888	0.199318	0.244903	0.137332	0.245067	0.400589	0.566291	0.161481	0.169717		0.160124	0.245957	0.500744	0.488065	0.205954	0.488063	0.414968	0.621887	0.459565	0.354974	0.199473
11.83	0.310019	0.48258	0.327662	0.364255	0.372911	0.287952	0.328194	0.358602	0.399837	0.33672		0.343584	0.190963	0.244634	0.132019	0.381764	0.309767	0.393274	0.297884	0.510985	0.199756		0.156798	0.421646	0.178819	0.27322	0.139973	0.249662	0.431043	0.542294	0.188912	0.158286		0.143399	0.270669	0.431277	0.470071	0.207267	0.559904	0.462831	0.569698	0.463061	0.383358	0.211644
11.96	0.319659	0.473472	0.340754	0.338838	0.398021	0.258917	0.31422	0.385086	0.410599	0.337046		0.380695	0.191487	0.269644	0.145956	0.351763	0.333876	0.446171	0.312071	0.582422	0.206137		0.17585	0.40303	0.171978	0.292587	0.141102	0.25396	0.424887	0.532075	0.203928	0.164604		0.132121	0.298942	0.391488	0.445716	0.207867	0.608699	0.460793	0.512367	0.452585	0.382256	0.225873
12.09	0.314067	0.468338	0.329011	0.299231	0.462621	0.248763	0.292512	0.383887	0.407293	0.30534		0.406946	0.190389	0.318426	0.155621	0.303905	0.380563	0.455582	0.334035	0.632627	0.203506		0.181019	0.366352	0.17604	0.311965	0.15098	0.260261	0.414849	0.510848	0.227308	0.158203		0.148112	0.314915	0.396095	0.377392	0.211297	0.617864	0.43563	0.488481	0.45179	0.381288	0.262178
12.22	0.321291	0.389346	0.333566	0.250588	0.525401	0.251879	0.257707	0.384953	0.39512	0.27897		0.44463	0.192293	0.364868	0.167477	0.307087	0.435551	0.440075	0.343047	0.682333	0.213756		0.195707	0.388948	0.20411	0.333539	0.165577	0.275705	0.439405	0.49947	0.257555	0.153945		0.146504	0.336461	0.414112	0.312737	0.247212	0.583336	0.464075	0.473688	0.455151	0.339196	0.287889
12.35	0.315068	0.348669	0.311671	0.232738	0.584666	0.219242	0.265469	0.385445	0.40102	0.266289		0.477718	0.204807	0.394191	0.179938	0.330663	0.484555	0.454604	0.345933	0.707547	0.21999		0.218344	0.426904	0.225479	0.364727	0.16734	0.297812	0.478474	0.476032	0.29062	0.169925		0.159003	0.380054	0.400852	0.266906	0.283955	0.539688	0.460016	0.448666	0.448084	0.305875	0.299887
12.48	0.287153	0.309186	0.301684	0.220206	0.584001	0.217471	0.263221	0.351565	0.393165	0.271513		0.504614	0.227749	0.396888	0.217347	0.35659	0.488346	0.42428	0.354381	0.671157	0.240086		0.264812	0.418267	0.232521	0.376505	0.165401	0.329512	0.417959	0.477339	0.322194	0.186973		0.158796	0.430435	0.406727	0.236195	0.303684	0.504104	0.416851	0.429397	0.432108	0.28282	0.339847
12.61	0.281913	0.279633	0.245993	0.215039	0.523834	0.222914	0.257495	0.345462	0.380048	0.279158		0.556511	0.273593	0.402177	0.228014	0.360527	0.506108	0.402808	0.392913	0.613313	0.241424		0.319043	0.365852	0.26023	0.379515	0.175095	0.365079	0.374554	0.501362	0.383757	0.200952		0.153033	0.48776	0.431928	0.189805	0.319335	0.494102	0.378897	0.400393	0.434413	0.276339	0.330254
12.74	0.275508	0.265347	0.234011	0.210537	0.413042	0.234479	0.276909	0.313357	0.34596	0.291669		0.64165	0.332183	0.420511	0.23886	0.35928	0.520241	0.42505	0.435305	0.537743	0.267456		0.360611	0.324647	0.294666	0.381911	0.189873	0.392778	0.347611	0.485436	0.448487	0.227582		0.150983	0.546987	0.431093	0.157736	0.34857	0.470859	0.383836	0.356367	0.4312	0.300209	0.330072
12.87	0.24399	0.282534	0.226983	0.222595	0.335492	0.23669	0.251894	0.27302	0.283573	0.27591		0.720944	0.385206	0.413528	0.260513	0.368746	0.558461	0.439929	0.489925	0.450985	0.283613		0.381839	0.29961	0.351018	0.385109	0.207493	0.422406	0.364878	0.426644	0.471572	0.262107		0.149629	0.595649	0.372631	0.140411	0.373971	0.431774	0.375961	0.339685	0.438317	0.361159	0.329692
13	0.236512	0.285865	0.199278	0.200561	0.279221	0.21607	0.233293	0.257276	0.227499	0.287945		0.781088	0.43095	0.419015	0.293162	0.385362	0.593912	0.411544	0.52628	0.404443	0.320515		0.372181	0.285544	0.428363	0.4031	0.235926	0.417873	0.410182	0.419369	0.474553	0.292594		0.154653	0.650196	0.336232	0.139018	0.401132	0.369381	0.324014	0.337992	0.419062	0.449055	0.315691
13.13	0.228528	0.272656	0.201451	0.202941	0.252377	0.207652	0.235378	0.233731	0.205652	0.273815		0.819241	0.470346	0.435652	0.339667	0.379072	0.583099	0.381967	0.563417	0.371109	0.331788		0.370277	0.283776	0.482744	0.426759	0.275181	0.398552	0.487596	0.349754	0.483934	0.309446		0.144589	0.711624	0.290771	0.135557	0.435198	0.312156	0.262699	0.365804	0.426394	0.522473	0.316913
13.26	0.227517	0.265414	0.222453	0.198687	0.239465	0.230836	0.228611	0.256979	0.179217	0.242022		0.790477	0.484358	0.459302	0.39143	0.388102	0.513541	0.336656	0.616982	0.340493	0.330745		0.379213	0.234704	0.497214	0.45442	0.323195	0.420196	0.479282	0.270545	0.453118	0.364777		0.151977	0.751506	0.251391	0.123526	0.454626	0.269753	0.233432	0.314899	0.430219	0.518028	0.309849
13.39	0.209245	0.259193	0.207555	0.213675	0.233078	0.238388	0.244011	0.273544	0.168236	0.208079		0.691633	0.505019	0.425574	0.472445	0.376001	0.477478	0.302124	0.66227	0.307405	0.350193		0.420622	0.223637	0.488057	0.496243	0.381536	0.448043	0.473787	0.23823	0.455765	0.402465		0.163366	0.737091	0.236691	0.129176	0.458975	0.252503	0.200152	0.274293	0.401526	0.422216	0.349286
13.52	0.197201	0.25398	0.220456	0.20387	0.224474	0.224004	0.253223	0.303839	0.163226	0.172847		0.607337	0.527038	0.375665	0.568836	0.366999	0.417044	0.268807	0.634008	0.27298	0.407983		0.483117	0.232577	0.46081	0.525185	0.421908	0.464462	0.507463	0.224183	0.469645	0.437362		0.173138	0.743264	0.217667	0.115247	0.429528	0.232795	0.20073	0.262557	0.370438	0.336869	0.393743
13.65	0.189543	0.243229	0.211943	0.196854	0.209143	0.237438	0.23336	0.288909	0.160175	0.160171		0.555512	0.580092	0.334688	0.606613	0.335238	0.340024	0.250649	0.572239	0.261647	0.4398		0.496032	0.227661	0.449511	0.499367	0.428032	0.441754	0.435279	0.202228	0.493811	0.515798		0.178771	0.737257	0.195622	0.121354	0.396332	0.210788	0.198009	0.245578	0.35716	0.272258	0.44991
13.78	0.181473	0.24969	0.200598	0.211316	0.191808	0.244611	0.219489	0.27136	0.151962	0.154862		0.498333	0.621083	0.304824	0.596843	0.294591	0.275247	0.211859	0.517514	0.24044	0.476531		0.499542	0.215644	0.452791	0.476204	0.417755	0.387468	0.337804	0.198219	0.536074	0.593725		0.159986	0.704105	0.207538	0.133249	0.397674	0.21166	0.191171	0.225891	0.332057	0.226601	0.472138
13.91	0.183596	0.262812	0.179562	0.191327	0.176848	0.252956	0.206242	0.284177	0.142896	0.14582		0.445628	0.605175	0.276797	0.543623	0.273918	0.246212	0.187192	0.467238	0.213733	0.489987		0.515318	0.203499	0.433995	0.484324	0.412203	0.331094	0.253214	0.207408	0.496524	0.630017		0.138804	0.66109	0.207724	0.118433	0.423809	0.203278	0.184707	0.214883	0.327081	0.187063	0.492999
14.04	0.179056	0.293042	0.156501	0.20587	0.163196	0.247499	0.200679	0.287946	0.144691	0.155088		0.378305	0.521509	0.23404	0.495246	0.23089	0.225498	0.185426	0.408428	0.20818	0.476844		0.508556	0.206553	0.447158	0.477143	0.398534	0.315627	0.251819	0.174946	0.403389	0.649862		0.132477	0.63746	0.204462	0.112237	0.425647	0.197361	0.206286	0.212237	0.317307	0.166254	0.509766
14.17	0.177665	0.291989	0.142652	0.199259	0.156945	0.236041	0.214497	0.297465	0.143743	0.143581		0.31235	0.406626	0.1825	0.489439	0.207482	0.220783	0.175874	0.353321	0.212228	0.440097		0.515023	0.21009	0.429884	0.441844	0.411939	0.318878	0.225855	0.207578	0.34032	0.648338		0.132283	0.614506	0.20689	0.112636	0.416527	0.182891	0.199979	0.222899	0.302688	0.158136	0.515587
14.3	0.180497	0.285156	0.15558	0.207339	0.145037	0.23462	0.219514	0.298901	0.135048	0.142378		0.270696	0.313395	0.165626	0.508419	0.200719	0.227069	0.183958	0.297048	0.209921	0.410643		0.503334	0.213999	0.405871	0.423169	0.470738	0.305205	0.21287	0.19419	0.337864	0.619425		0.128972	0.534382	0.196248	0.106258	0.407279	0.186477	0.216246	0.209146	0.290633	0.145646	0.502819
14.43	0.174052	0.281626	0.13649	0.209346	0.139936	0.224522	0.233106	0.326266	0.137376	0.141371		0.231956	0.257335	0.158737	0.498384	0.193772	0.219132	0.168686	0.265416	0.19395	0.43088		0.493202	0.198103	0.379296	0.385349	0.552708	0.304571	0.22731	0.174551	0.328662	0.597367		0.133594	0.475481	0.186216	0.113922	0.363903	0.191534	0.230719	0.216281	0.286752	0.140426	0.488393
14.56	0.168433	0.274108	0.143789	0.215223	0.139921	0.226246	0.225736	0.342486	0.145845	0.145077		0.217136	0.234118	0.140023	0.41948	0.201146	0.216883	0.166184	0.239605	0.172346	0.46416		0.492758	0.207657	0.346289	0.344101	0.585274	0.304768	0.222514	0.184117	0.333294	0.540977		0.122344	0.444281	0.194274	0.119136	0.300725	0.170373	0.207898	0.244513	0.26744	0.138254	0.484589
14.69	0.160921	0.272474	0.136072	0.213576	0.130549	0.225826	0.221693	0.340766	0.131083	0.139122		0.193836	0.203842	0.136916	0.344644	0.208382	0.200467	0.148215	0.210085	0.168579	0.483661		0.488968	0.206445	0.313744	0.303755	0.543754	0.297142	0.228707	0.200206	0.326308	0.461818		0.125249	0.401587	0.182148	0.119655	0.229147	0.163125	0.175119	0.246342	0.245362	0.145516	0.483252
14.82	0.165625	0.221256		0.194641	0.109689	0.212925	0.185087					0.189192												0.20171	0.292368	0.257773	0.398719	0.242504	0.247664	0.152552	0.247555	0.361857		0.102107	0.335196	0.190901		0.179675	0.133762
14.95	0,055113143*					0,119132877*	0,080386761*
15.08	0,045415447*					0,289128055*	0,379625876*
15.21						0,289128055*	0,379625876*
15.34						0,289128055*	0,379625876*
15.47						0,289128055*	0,379625876*
15.6							0,379625876*

## Sheet: Buffer
	HisH2HvD-mRFP1											CID-EGFP
0	0.152233	0.217061	0.185298	0.329939	0.263602	0.286801	0.164403	0.347539	0.243237	0.378463		0.162919	0.134873	0.113422	0.185058	0.180909	0.232302	0.158869	0.171444	0.19088	0.420429
0.13	0.157138	0.216965	0.187312	0.347907	0.260559	0.306557	0.169603	0.351406	0.240612	0.393629		0.166175	0.150089	0.109321	0.223365	0.206968	0.249164	0.163218	0.18608	0.206687	0.374648
0.26	0.150182	0.223187	0.176569	0.363536	0.266115	0.317778	0.165716	0.343336	0.233636	0.412411		0.177304	0.166413	0.116248	0.287241	0.224793	0.264863	0.166519	0.193393	0.224512	0.398011
0.39	0.161007	0.226618	0.17024	0.373384	0.27114	0.34126	0.175789	0.324485	0.228625	0.431565		0.191052	0.181921	0.117521	0.388325	0.232671	0.288056	0.15914	0.200412	0.233721	0.411751
0.52	0.181669	0.23543	0.167973	0.376262	0.279956	0.340908	0.175274	0.328753	0.217972	0.475369		0.204763	0.236093	0.11324	0.461853	0.222198	0.30378	0.159661	0.205744	0.251049	0.430287
0.65	0.190594	0.25058	0.169608	0.411673	0.304548	0.377784	0.178408	0.32962	0.231643	0.503659		0.234306	0.290481	0.121136	0.460646	0.217279	0.309756	0.172347	0.239637	0.247062	0.458392
0.78	0.204779	0.263807	0.17453	0.431073	0.326176	0.400844	0.191188	0.350688	0.23122	0.524742		0.269957	0.34535	0.128072	0.465704	0.253926	0.332131	0.160699	0.283996	0.237158	0.491298
0.91	0.212799	0.287882	0.192559	0.452089	0.344045	0.413465	0.187381	0.374353	0.22451	0.57003		0.300299	0.419484	0.139675	0.487838	0.294787	0.368383	0.174616	0.326316	0.241453	0.512149
1.04	0.235796	0.31415	0.192373	0.493115	0.357314	0.431721	0.192964	0.393813	0.222463	0.59686		0.31698	0.462804	0.153363	0.472529	0.324185	0.419495	0.178799	0.35696	0.247951	0.538657
1.17	0.259661	0.364656	0.199671	0.535419	0.377864	0.475632	0.199909	0.449237	0.23139	0.633318		0.324553	0.503849	0.182778	0.412711	0.33041	0.458725	0.187812	0.376945	0.250743	0.530333
1.3	0.279435	0.408948	0.209751	0.58223	0.405834	0.518162	0.205511	0.47119	0.236134	0.659683		0.331602	0.514836	0.222498	0.382813	0.335256	0.452506	0.168971	0.426445	0.261957	0.504538
1.43	0.30261	0.444723	0.214476	0.623831	0.426424	0.560441	0.21424	0.513102	0.255474	0.683863		0.335841	0.53028	0.268027	0.368909	0.34312	0.44795	0.169095	0.490396	0.269276	0.473781
1.56	0.324204	0.506819	0.234955	0.662853	0.43389	0.584001	0.223228	0.542096	0.261923	0.684267		0.342141	0.517397	0.309844	0.353222	0.324797	0.474621	0.195705	0.554226	0.28115	0.403185
1.69	0.351969	0.558738	0.263688	0.676556	0.479076	0.642182	0.230639	0.571733	0.278849	0.706504		0.41416	0.521644	0.339895	0.338181	0.293936	0.496691	0.210144	0.558449	0.290371	0.387249
1.82	0.404806	0.61054	0.276915	0.696772	0.489827	0.670759	0.236017	0.622822	0.285164	0.712602		0.478153	0.507075	0.347387	0.315852	0.261121	0.507883	0.216152	0.559827	0.292855	0.387738
1.95	0.443064	0.65698	0.309987	0.733039	0.489459	0.711274	0.249886	0.634329	0.296031	0.72531		0.576234	0.431106	0.394669	0.27955	0.245588	0.528749	0.229544	0.556061	0.314978	0.397577
2.08	0.482729	0.709781	0.34395	0.748691	0.494543	0.733221	0.251266	0.65659	0.317319	0.725348		0.630359	0.3337	0.456904	0.241339	0.227571	0.53775	0.239099	0.509446	0.349571	0.427419
2.21	0.528922	0.744681	0.380255	0.754505	0.500784	0.77293	0.265818	0.681995	0.345865	0.736065		0.65127	0.261137	0.5364	0.204216	0.243312	0.513824	0.257885	0.493093	0.385151	0.420543
2.34	0.572703	0.778904	0.419936	0.756717	0.499681	0.784485	0.263621	0.704951	0.348236	0.732298		0.636672	0.211976	0.592554	0.187906	0.281743	0.474691	0.30505	0.48233	0.418643	0.372532
2.47	0.630329	0.777551	0.474243	0.763689	0.503727	0.789328	0.271809	0.723524	0.378443	0.737927		0.618268	0.193093	0.556866	0.170606	0.321883	0.431349	0.322671	0.482339	0.455187	0.344632
2.6	0.684659	0.78341	0.515329	0.756733	0.527769	0.792825	0.292303	0.77236	0.422355	0.731106		0.570489	0.176751	0.464361	0.150777	0.374334	0.38642	0.357661	0.461014	0.482771	0.353167
2.73	0.726949	0.79479	0.56366	0.737784	0.5235	0.797154	0.30629	0.794806	0.471158	0.731123		0.524686	0.159833	0.402877	0.140503	0.40373	0.332825	0.393105	0.43562	0.51893	0.326326
2.86	0.752119	0.761801	0.607823	0.68828	0.53879	0.784387	0.334725	0.804086	0.525408	0.716713		0.484944	0.156386	0.380105	0.132468	0.419427	0.311483	0.459073	0.394436	0.631025	0.278667
2.99	0.783985	0.737727	0.647734	0.656734	0.563419	0.767174	0.378042	0.805172	0.592786	0.691094		0.427343	0.153708	0.36445	0.124636	0.435576	0.276456	0.503475	0.365877	0.675853	0.254181
3.12	0.792805	0.706195	0.66284	0.605864	0.583763	0.748597	0.43121	0.794071	0.665439	0.679768		0.404046	0.166655	0.345348	0.117347	0.430027	0.256394	0.554123	0.340526	0.692996	0.234182
3.25	0.786138	0.678394	0.6928	0.576667	0.604938	0.738481	0.494726	0.789824	0.720456	0.663267		0.400804	0.202649	0.303985	0.1098	0.405704	0.252589	0.575126	0.356341	0.669096	0.231651
3.38	0.772931	0.638351	0.71937	0.520088	0.603887	0.712269	0.554497	0.780119	0.757092	0.65041		0.393011	0.212941	0.270252	0.108101	0.387889	0.246133	0.607689	0.355917	0.594995	0.211582
3.51	0.759414	0.592552	0.730332	0.471968	0.618765	0.682114	0.629028	0.746884	0.792542	0.624919		0.354653	0.201958	0.253961	0.102359	0.3701	0.25724	0.627896	0.346806	0.492936	0.207073
3.64	0.720042	0.538877	0.735106	0.438758	0.615997	0.639952	0.689429	0.70535	0.814357	0.583169		0.343523	0.179188	0.250051	0.100376	0.333511	0.249512	0.612242	0.319655	0.429632	0.210781
3.77	0.674198	0.493017	0.726739	0.412504	0.63454	0.598217	0.751291	0.681284	0.829892	0.540317		0.319939	0.156875	0.220108	0.095417	0.299426	0.212554	0.556322	0.306837	0.373093	0.214491
3.9	0.632721	0.444472	0.710389	0.406024	0.644786	0.559273	0.803419	0.652153	0.828613	0.528436		0.287493	0.143891	0.178097	0.0908772	0.29576	0.200826	0.48275	0.310954	0.324893	0.195832
4.03	0.58753	0.40327	0.708088	0.361731	0.651215	0.534677	0.849064	0.617264	0.82194	0.504599		0.268534	0.134847	0.159453	0.0877651	0.292944	0.177009	0.420627	0.294664	0.292733	0.196109
4.16	0.532098	0.355338	0.69941	0.340764	0.652883	0.500281	0.872822	0.579733	0.826272	0.466576		0.228076	0.127841	0.14235	0.0985045	0.289117	0.177948	0.359866	0.273555	0.258402	0.176382
4.29	0.489233	0.331078	0.664177	0.327936	0.650158	0.483291	0.893712	0.551405	0.818752	0.451911		0.221296	0.123639	0.138208	0.0871257	0.27034	0.157171	0.304022	0.255018	0.242401	0.175008
4.42	0.436896	0.30441	0.66189	0.313231	0.646776	0.441396	0.900084	0.512598	0.801649	0.427826		0.225747	0.125565	0.138011	0.092818	0.264386	0.138581	0.267096	0.255021	0.218025	0.18965
4.55	0.41057	0.285155	0.631277	0.30403	0.628517	0.40605	0.892241	0.494533	0.765626	0.418125		0.201807	0.120997	0.131209	0.090324	0.246747	0.138494	0.227578	0.259185	0.226258	0.180836
4.68	0.360436	0.270774	0.601094	0.302244	0.620918	0.412001	0.868823	0.457709	0.729097	0.395228		0.197101	0.117532	0.128195	0.0858662	0.233823	0.147721	0.207559	0.240943	0.227376	0.182584
4.81	0.331636	0.26689	0.561901	0.287491	0.608601	0.388406	0.829058	0.431812	0.693845	0.389556		0.187988	0.114219	0.117702	0.0873528	0.220826	0.136608	0.194078	0.234665	0.218144	0.186002
4.94	0.300781	0.247585	0.536464	0.281606	0.574013	0.37331	0.789911	0.406286	0.656466	0.370657		0.17253	0.115935	0.114613	0.0818703	0.227077	0.132966	0.186275	0.216616	0.215062	0.185083
5.07	0.268368	0.238797	0.508678	0.273135	0.562992	0.368314	0.748458	0.389336	0.621838	0.369292		0.168371	0.104897	0.10967	0.0846788	0.230115	0.137875	0.188484	0.213132	0.203808	0.18748
5.2	0.25149	0.248769	0.494642	0.266566	0.542528	0.354423	0.686214	0.367928	0.580768	0.357633		0.16834	0.109718	0.11294	0.0773696	0.224032	0.138988	0.181804	0.190357	0.205905	0.188992
5.33	0.230586	0.244946	0.443481	0.258359	0.509427	0.34503	0.633928	0.340311	0.550026	0.351478		0.171322	0.114195	0.0987165	0.0793269	0.21616	0.151365	0.176842	0.189302	0.205423	0.179066
5.46	0.209587	0.234917	0.413882	0.263964	0.491811	0.336475	0.563187	0.310136	0.516141	0.353027		0.148985	0.112865	0.10522	0.0763816	0.196474	0.145496	0.17291	0.172999	0.205442	0.179294
5.59	0.192267	0.237234	0.391358	0.253153	0.471295	0.316945	0.515984	0.305765	0.477322	0.335806		0.152764	0.106882	0.106074	0.0818934	0.176055	0.131312	0.178292	0.176972	0.197566	0.184523
5.72	0.181019	0.229889	0.374014	0.253259	0.458688	0.312371	0.475891	0.294067	0.432551	0.334091		0.146202	0.110655	0.10342	0.0828699	0.156789	0.124884	0.172264	0.17316	0.201786	0.178547
5.85	0.176858	0.221316	0.356065	0.242836	0.446586	0.302843	0.441068	0.289494	0.397769	0.315368		0.143354	0.112154	0.106828	0.0815436	0.156964	0.123973	0.175755	0.169011	0.189715	0.179828
5.98	0.176093	0.209983	0.337302	0.231162	0.441826	0.282164	0.409187	0.274146	0.361958	0.301494		0.13828	0.117425	0.118591	0.0764229	0.1615	0.135343	0.168491	0.169553	0.190805	0.172719
6.11	0.165188	0.207362	0.320591	0.216898	0.420291	0.289624	0.388983	0.285945	0.346895	0.293098		0.129324	0.118847	0.118698	0.0797398	0.156034	0.134118	0.161164	0.164562	0.186405	0.163151
6.24	0.152391	0.194357	0.31745	0.215362	0.401529	0.27173	0.354427	0.26415	0.336249	0.290295		0.136901	0.109455	0.108804	0.0813576	0.146345	0.133943	0.170285	0.159041	0.191309	0.170238
6.37	0.146809	0.187516	0.307261	0.209786	0.385502	0.272501	0.343075	0.256668	0.312829	0.290245		0.136551	0.107402	0.109865	0.0759858	0.149721	0.128268	0.146325	0.145157	0.185684	0.167862
6.5	0.148765	0.194919	0.30133	0.224822	0.388531	0.281158	0.324259	0.246497	0.304491	0.284481		0.141002	0.111658	0.100398	0.0752036	0.147905	0.118519	0.150973	0.14166	0.17852	0.178217
6.63	0.141455	0.195426	0.296849	0.229806	0.382359	0.288341	0.319356	0.246268	0.305087	0.268308		0.135146	0.113694	0.105645	0.0727446	0.144236	0.121305	0.150689	0.142515	0.181759	0.174237
6.76	0.128702	0.201636	0.287104	0.217705	0.357996	0.28205	0.308663	0.26035	0.29267	0.270209		0.135934	0.110733	0.10871	0.072012	0.141709	0.126062	0.154725	0.151213	0.183559	0.160852
6.89	0.13528	0.204232	0.2771	0.214245	0.360108	0.260077	0.303668	0.237968	0.284101	0.274608		0.141927	0.11142	0.0972024	0.0760175	0.142314	0.122878	0.169242	0.143278	0.179553	0.17028
7.02	0.135016	0.202271	0.277962	0.214829	0.359539	0.260694	0.30826	0.251123	0.281227	0.280454		0.141435	0.108689	0.0909777	0.0710472	0.136003	0.127412	0.153775	0.149455	0.194928	0.182839
7.15	0.135945	0.201454	0.281675	0.200312	0.344855	0.254134	0.310663	0.237331	0.277827	0.265885		0.130087	0.10667	0.103895	0.0695903	0.149376	0.123474	0.151387	0.133851	0.177547	0.175214
7.28	0.131572	0.210626	0.276148	0.214973	0.327194	0.25567	0.317976	0.255124	0.270844	0.261595		0.125607	0.108895	0.113289	0.0693163	0.14507	0.122558	0.158179	0.130507	0.186532	0.171151
7.41	0.13066	0.206051	0.28346	0.209382	0.326402	0.258971	0.314004	0.253675	0.275938	0.264767		0.12542	0.106643	0.11562	0.0695161	0.138394	0.126817	0.158676	0.135436	0.188499	0.157001
7.54	0.129477	0.208029	0.282336	0.201583	0.331997	0.264241	0.32041	0.261603	0.26645	0.259816		0.126481	0.112068	0.10873	0.076339	0.133517	0.12803	0.158793	0.142006	0.182539	0.16737
7.67	0.128013	0.21867	0.299583	0.193852	0.337557	0.246564	0.317028	0.266358	0.274308	0.269853		0.129156	0.110719	0.0999496	0.0706422	0.140034	0.121369	0.170483	0.141078	0.187534	0.158696
7.8	0.134561	0.224658	0.305294	0.200419	0.329659	0.254896	0.326055	0.256323	0.288168	0.259927		0.129255	0.109519	0.0977558	0.0704346	0.134552	0.124653	0.161376	0.137984	0.175319	0.161729
7.93	0.140915	0.218791	0.304013	0.199405	0.320992	0.250572	0.328315	0.245599	0.311489	0.265872		0.12402	0.112006	0.0998121	0.0691363	0.137907	0.129172	0.151907	0.131565	0.183451	0.160623
8.06	0.140197	0.230689	0.32013	0.218891	0.333807	0.251864	0.330573	0.258376	0.316169	0.268152		0.131177	0.109601	0.105609	0.0735641	0.134247	0.130651	0.153941	0.135784	0.184484	0.149384
8.19	0.138814	0.226143	0.329467	0.21982	0.33069	0.271382	0.338637	0.246455	0.323384	0.268405		0.134145	0.109194	0.101122	0.0757367	0.130292	0.12662	0.160237	0.124278	0.184246	0.160971
8.32	0.143834	0.24258	0.33612	0.219888	0.343734	0.293898	0.347531	0.249573	0.340429	0.279012		0.130672	0.108865	0.097164	0.0825891	0.123887	0.131692	0.161255	0.122032	0.188158	0.149564
8.45	0.151732	0.234396	0.35045	0.231123	0.352081	0.288503	0.348483	0.235915	0.363111	0.284615		0.138073	0.121321	0.103949	0.0759212	0.129385	0.133356	0.15592	0.145111	0.18944	0.152918
8.58	0.151189	0.233685	0.368038	0.250504	0.341169	0.31283	0.364175	0.252001	0.371084	0.276788		0.12995	0.124289	0.106692	0.0747375	0.122122	0.133056	0.163637	0.140111	0.183042	0.144628
8.71	0.165725	0.240632	0.374062	0.245966	0.351132	0.319664	0.379373	0.239171	0.392174	0.268313		0.125573	0.120321	0.107809	0.0784316	0.130422	0.139073	0.16781	0.132103	0.179197	0.131113
8.84	0.161421	0.245087	0.369099	0.244517	0.359184	0.327316	0.383219	0.242634	0.407948	0.266684		0.133802	0.11892	0.108128	0.0743994	0.131803	0.132775	0.159526	0.132602	0.188197	0.144213
8.97	0.166397	0.254733	0.401642	0.244441	0.36634	0.33688	0.388399	0.260884	0.422379	0.264768		0.127686	0.114259	0.104417	0.075495	0.129016	0.125005	0.158571	0.126458	0.180226	0.15697
9.1	0.177774	0.239843	0.416776	0.237163	0.383865	0.343185	0.397556	0.272149	0.436912	0.295238		0.134797	0.119737	0.100861	0.07798	0.133174	0.13191	0.166777	0.13822	0.184787	0.151049
9.23	0.19854	0.235425	0.443099	0.246369	0.393092	0.376629	0.421682	0.275223	0.461821	0.307595		0.142906	0.118181	0.0998625	0.078523	0.140695	0.120995	0.169287	0.13369	0.182758	0.150188
9.36	0.222029	0.259888	0.465817	0.267083	0.398072	0.382464	0.422864	0.281475	0.503895	0.304973		0.149596	0.109254	0.100229	0.079444	0.141032	0.119909	0.169348	0.142146	0.188436	0.140682
9.49	0.22938	0.253768	0.496946	0.272813	0.411951	0.406081	0.434534	0.291537	0.528929	0.30528		0.143825	0.114351	0.0986248	0.0896017	0.137195	0.122703	0.175068	0.143466	0.185776	0.151036
9.62	0.252483	0.285388	0.520738	0.292801	0.436498	0.410649	0.455895	0.300027	0.57428	0.299819		0.139369	0.117486	0.0980741	0.0855581	0.13578	0.128354	0.17889	0.14283	0.198114	0.151446
9.75	0.266719	0.299922	0.537282	0.284362	0.451896	0.426988	0.483242	0.315847	0.624115	0.309462		0.144041	0.11966	0.105792	0.0800736	0.134997	0.122672	0.184426	0.142849	0.220606	0.153143
9.88	0.296898	0.31798	0.568535	0.293791	0.491398	0.459518	0.509273	0.336682	0.67964	0.311875		0.155238	0.120097	0.101559	0.0830201	0.138281	0.139197	0.193239	0.148406	0.226662	0.155184
10.01	0.3229	0.340738	0.601073	0.315866	0.509516	0.477613	0.530746	0.347266	0.728552	0.336033		0.15371	0.123491	0.104957	0.0874837	0.143759	0.133709	0.221111	0.153303	0.238732	0.163137
10.14	0.362149	0.354631	0.627458	0.32478	0.547732	0.486144	0.558907	0.36538	0.757856	0.331508		0.150459	0.125896	0.112084	0.0929559	0.143668	0.136543	0.228374	0.153884	0.241328	0.163686
10.27	0.406448	0.370178	0.670473	0.340243	0.583623	0.501222	0.580447	0.38231	0.779409	0.340202		0.156713	0.120126	0.109028	0.0916594	0.153272	0.143165	0.253036	0.158128	0.24617	0.166364
10.4	0.455195	0.379373	0.692113	0.356412	0.600796	0.511808	0.602746	0.397684	0.814283	0.352078		0.161976	0.117173	0.120623	0.0909588	0.178437	0.143322	0.237243	0.163217	0.234175	0.167599
10.53	0.512444	0.40892	0.711521	0.393212	0.624259	0.533712	0.619573	0.441447	0.839656	0.383863		0.164537	0.125486	0.121054	0.0969134	0.191922	0.145762	0.237955	0.169746	0.232863	0.168456
10.66	0.568472	0.421925	0.735426	0.435853	0.624895	0.561456	0.643676	0.482301	0.855644	0.400921		0.173287	0.125175	0.125042	0.096567	0.209843	0.154679	0.240239	0.187442	0.248728	0.156717
10.79	0.628331	0.443659	0.733311	0.463156	0.63639	0.574407	0.650552	0.535421	0.860716	0.431095		0.176436	0.123412	0.132923	0.100111	0.226904	0.166681	0.254251	0.198286	0.274446	0.161502
10.92	0.685487	0.472796	0.730616	0.491158	0.658144	0.600876	0.655984	0.600444	0.850071	0.462908		0.179069	0.119482	0.160664	0.107556	0.247283	0.176473	0.28604	0.212916	0.281719	0.177422
11.05	0.73036	0.51929	0.739796	0.549763	0.633683	0.638289	0.654142	0.659548	0.830797	0.491049		0.192239	0.124712	0.18136	0.104795	0.262444	0.187461	0.312894	0.210139	0.259212	0.161485
11.18	0.776709	0.57356	0.730407	0.586346	0.62333	0.658681	0.641646	0.705764	0.798102	0.514022		0.195304	0.123511	0.220869	0.104088	0.313053	0.202152	0.31744	0.220158	0.261108	0.174825
11.31	0.831457	0.612303	0.73146	0.649939	0.620145	0.670868	0.631148	0.727108	0.778661	0.534648		0.210291	0.133025	0.252124	0.109661	0.375673	0.212159	0.335001	0.222027	0.287306	0.170231
11.44	0.848566	0.630082	0.713461	0.692124	0.596566	0.706473	0.60881	0.775942	0.749315	0.576909		0.214039	0.151973	0.262893	0.121344	0.427074	0.225433	0.318719	0.234656	0.306564	0.183378
11.57	0.874709	0.68051	0.69605	0.739603	0.584957	0.729844	0.587481	0.794279	0.679127	0.610771		0.250499	0.173481	0.246812	0.118646	0.429973	0.255835	0.330904	0.246537	0.347206	0.189687
11.7	0.890876	0.722998	0.679064	0.781477	0.566975	0.728692	0.553838	0.818455	0.653966	0.62922		0.297724	0.184234	0.232426	0.122725	0.402249	0.287362	0.353411	0.274376	0.438841	0.184923
11.83	0.877191	0.726567	0.63603	0.822154	0.552017	0.727944	0.51013	0.810403	0.608015	0.643809		0.343584	0.190963	0.244634	0.132019	0.381764	0.309767	0.393274	0.297884	0.510985	0.199756
11.96	0.882083	0.751521	0.598991	0.855525	0.545911	0.713905	0.466987	0.822682	0.556343	0.665239		0.380695	0.191487	0.269644	0.145956	0.351763	0.333876	0.446171	0.312071	0.582422	0.206137
12.09	0.862986	0.752411	0.556261	0.864121	0.51235	0.68837	0.436855	0.800651	0.505661	0.674743		0.406946	0.190389	0.318426	0.155621	0.303905	0.380563	0.455582	0.334035	0.632627	0.203506
12.22	0.820215	0.749059	0.533373	0.875346	0.491848	0.672766	0.391784	0.798783	0.463148	0.666949		0.44463	0.192293	0.364868	0.167477	0.307087	0.435551	0.440075	0.343047	0.682333	0.213756
12.35	0.775797	0.72034	0.497677	0.88203	0.472856	0.649314	0.363031	0.755902	0.414712	0.66728		0.477718	0.204807	0.394191	0.179938	0.330663	0.484555	0.454604	0.345933	0.707547	0.21999
12.48	0.735678	0.684815	0.439576	0.868596	0.443562	0.604953	0.327673	0.713705	0.369502	0.661876		0.504614	0.227749	0.396888	0.217347	0.35659	0.488346	0.42428	0.354381	0.671157	0.240086
12.61	0.680976	0.647042	0.386536	0.85057	0.43891	0.574187	0.298135	0.688768	0.331047	0.662255		0.556511	0.273593	0.402177	0.228014	0.360527	0.506108	0.402808	0.392913	0.613313	0.241424
12.74	0.625491	0.612142	0.359439	0.818049	0.41518	0.556666	0.25995	0.645389	0.302097	0.635311		0.64165	0.332183	0.420511	0.23886	0.35928	0.520241	0.42505	0.435305	0.537743	0.267456
12.87	0.56443	0.558313	0.326413	0.791953	0.387855	0.512451	0.238904	0.608121	0.2804	0.626058		0.720944	0.385206	0.413528	0.260513	0.368746	0.558461	0.439929	0.489925	0.450985	0.283613
13	0.496328	0.505885	0.293291	0.765067	0.35637	0.483022	0.226831	0.57153	0.259737	0.610002		0.781088	0.43095	0.419015	0.293162	0.385362	0.593912	0.411544	0.52628	0.404443	0.320515
13.13	0.446356	0.470322	0.26684	0.70769	0.333987	0.446833	0.207538	0.526104	0.243211	0.583232		0.819241	0.470346	0.435652	0.339667	0.379072	0.583099	0.381967	0.563417	0.371109	0.331788
13.26	0.399748	0.429425	0.234383	0.664553	0.31493	0.422878	0.195711	0.476754	0.236321	0.567513		0.790477	0.484358	0.459302	0.39143	0.388102	0.513541	0.336656	0.616982	0.340493	0.330745
13.39	0.356039	0.374858	0.224708	0.631272	0.303033	0.404062	0.181252	0.43602	0.234311	0.542378		0.691633	0.505019	0.425574	0.472445	0.376001	0.477478	0.302124	0.66227	0.307405	0.350193
13.52	0.313164	0.32309	0.204867	0.588187	0.301884	0.378937	0.17513	0.421101	0.224384	0.513914		0.607337	0.527038	0.375665	0.568836	0.366999	0.417044	0.268807	0.634008	0.27298	0.407983
13.65	0.276798	0.272028	0.206139	0.564536	0.276653	0.386171	0.16329	0.399948	0.209259	0.49257		0.555512	0.580092	0.334688	0.606613	0.335238	0.340024	0.250649	0.572239	0.261647	0.4398
13.78	0.253134	0.246566	0.1967	0.51087	0.276702	0.353073	0.164122	0.374841	0.212975	0.454896		0.498333	0.621083	0.304824	0.596843	0.294591	0.275247	0.211859	0.517514	0.24044	0.476531
13.91	0.228264	0.243507	0.195956	0.468343	0.270281	0.333106	0.149714	0.353157	0.213613	0.430324		0.445628	0.605175	0.276797	0.543623	0.273918	0.246212	0.187192	0.467238	0.213733	0.489987
14.04	0.212516	0.24179	0.188338	0.425536	0.256439	0.330669	0.145932	0.33988	0.214127	0.403619		0.378305	0.521509	0.23404	0.495246	0.23089	0.225498	0.185426	0.408428	0.20818	0.476844
14.17	0.197037	0.228991	0.179479	0.398271	0.245544	0.308238	0.143249	0.325794	0.208855	0.388		0.31235	0.406626	0.1825	0.489439	0.207482	0.220783	0.175874	0.353321	0.212228	0.440097
14.3	0.190758	0.217833	0.18337	0.359506	0.247534	0.300756	0.138684	0.295573	0.203815	0.355829		0.270696	0.313395	0.165626	0.508419	0.200719	0.227069	0.183958	0.297048	0.209921	0.410643
14.43	0.181777	0.21563	0.168135	0.336325	0.240725	0.284178	0.137364	0.299829	0.198577	0.337544		0.231956	0.257335	0.158737	0.498384	0.193772	0.219132	0.168686	0.265416	0.19395	0.43088
14.56	0.167986	0.208338	0.174059	0.32674	0.227124	0.289938	0.130929	0.295867	0.200591	0.308682		0.217136	0.234118	0.140023	0.41948	0.201146	0.216883	0.166184	0.239605	0.172346	0.46416
14.69	0.163887	0.194425	0.171041	0.293374	0.220576	0.277467	0.111496	0.274504	0.203697	0.290463		0.193836	0.203842	0.136916	0.344644	0.208382	0.200467	0.148215	0.210085	0.168579	0.483661
14.82	0.166105											0.189192

## Sheet: TEV
	HisH2HvD-mRFP1											CID-EGFP
0	0.0767414	0.146377	0.281229	0.0996429	0.156027	0.116635	0.200616	0.276024	0.193133	0.148144		0.184759	0.326555	0.138784	0.0996429	0.122679	0.19076	0.248856	0.254614	0.148571	0.142386
0.13	0.0813962	0.149837	0.283513	0.107771	0.154568	0.116376	0.198351	0.249488	0.203072	0.152693		0.182242	0.329465	0.142862	0.217383	0.129936	0.199327	0.26673	0.268979	0.148118	0.138182
0.26	0.0826822	0.148395	0.315794	0.103143	0.152902	0.113399	0.212868	0.260555	0.200674	0.157936		0.19192	0.31383	0.137066	0.207583	0.1289	0.208391	0.246505	0.268779	0.149117	0.137577
0.39	0.0839154	0.141087	0.29197	0.103087	0.162283	0.114603	0.217179	0.261116	0.194071	0.159963		0.182212	0.310766	0.132013	0.205194	0.138705	0.215698	0.251656	0.284491	0.152753	0.126487
0.52	0.0793447	0.14171	0.257983	0.0966359	0.149612	0.110064	0.213705	0.264965	0.176615	0.161921		0.185561	0.302456	0.143056	0.21244	0.136502	0.243446	0.277513	0.290506	0.15252	0.133884
0.65	0.082153	0.143185	0.283248	0.0988766	0.149586	0.100467	0.21029	0.260656	0.187877	0.157114		0.194445	0.306112	0.143016	0.213575	0.130908	0.255877	0.279598	0.289333	0.153719	0.135579
0.78	0.0794444	0.141293	0.290501	0.103415	0.150676	0.101047	0.216624	0.263218	0.177951	0.158298		0.185729	0.331369	0.153931	0.215468	0.133302	0.275678	0.244877	0.309568	0.155059	0.141728
0.91	0.076704	0.13588	0.261213	0.109327	0.14763	0.101821	0.203252	0.236168	0.179202	0.161609		0.188152	0.329643	0.141828	0.207705	0.128805	0.261508	0.260976	0.33968	0.159953	0.140065
1.04	0.0781323	0.14051	0.254055	0.105252	0.148824	0.105523	0.193482	0.225622	0.188648	0.167727		0.191554	0.311608	0.151274	0.210312	0.137575	0.237682	0.264811	0.306446	0.155471	0.141171
1.17	0.0789658	0.137004	0.240023	0.107868	0.142194	0.101646	0.219559	0.21547	0.184619	0.169625		0.189182	0.321596	0.154701	0.207207	0.144291	0.218538	0.249376	0.307423	0.160083	0.146394
1.3	0.079355	0.122906	0.251982	0.106597	0.141322	0.102174	0.225795	0.213062	0.193911	0.171337		0.199729	0.306062	0.164375	0.201013	0.148594	0.217647	0.225863	0.323332	0.160458	0.149295
1.43	0.083031	0.121245	0.273917	0.109487	0.142404	0.108669	0.202539	0.200193	0.199961	0.175401		0.193884	0.283203	0.184652	0.205408	0.149299	0.222321	0.239786	0.311246	0.174077	0.145684
1.56	0.0882515	0.121573	0.279846	0.101773	0.150769	0.108982	0.207447	0.212052	0.199805	0.176948		0.184717	0.265999	0.195771	0.209029	0.154435	0.221618	0.248795	0.293933	0.172805	0.161129
1.69	0.0895121	0.127485	0.255791	0.110049	0.15944	0.123287	0.223779	0.208391	0.184412	0.171507		0.183414	0.26018	0.199278	0.204388	0.196538	0.230545	0.255748	0.299931	0.170803	0.158415
1.82	0.09795	0.122666	0.257572	0.11411	0.154778	0.128762	0.191957	0.190538	0.189656	0.176126		0.213925	0.26365	0.210232	0.205599	0.225819	0.199096	0.249967	0.270934	0.180201	0.180133
1.95	0.105497	0.120828	0.283734	0.116521	0.160842	0.135057	0.202932	0.19377	0.181899	0.176629		0.218425	0.260728	0.215836	0.202291	0.247824	0.190722	0.25176	0.281102	0.18687	0.201642
2.08	0.112814	0.123172	0.261845	0.11579	0.172991	0.141561	0.216737	0.196841	0.178152	0.18211		0.220438	0.26206	0.222262	0.203765	0.248718	0.192504	0.248734	0.285945	0.190197	0.249478
2.21	0.116769	0.125268	0.284751	0.113565	0.184966	0.138886	0.223619	0.205956	0.174599	0.187372		0.218251	0.274801	0.25495	0.215614	0.249513	0.190754	0.232902	0.280003	0.193926	0.290563
2.34	0.123005	0.120664	0.262414	0.107812	0.19309	0.141087	0.21599	0.209782	0.174482	0.18683		0.198955	0.277766	0.296363	0.234064	0.261257	0.192228	0.230083	0.297972	0.21959	0.312508
2.47	0.129113	0.124764	0.280997	0.109036	0.203639	0.146434	0.206468	0.218194	0.184159	0.200433		0.189723	0.280492	0.33763	0.239467	0.304135	0.189042	0.219577	0.282981	0.254316	0.331801
2.6	0.13274	0.133369	0.3123	0.111862	0.203795	0.153644	0.213158	0.199093	0.18943	0.216938		0.205918	0.336623	0.363951	0.26437	0.321982	0.221962	0.219754	0.29225	0.263117	0.337963
2.73	0.139022	0.127272	0.321825	0.113166	0.214031	0.15735	0.196317	0.195098	0.184469	0.229866		0.213158	0.386011	0.410074	0.271919	0.349333	0.233021	0.240233	0.32271	0.284236	0.348289
2.86	0.138521	0.131679	0.341709	0.120116	0.223812	0.154496	0.17677	0.19603	0.193329	0.247257		0.211629	0.434728	0.466368	0.293545	0.369734	0.250557	0.24034	0.363376	0.290711	0.331697
2.99	0.137063	0.14145	0.376504	0.126168	0.230093	0.154565	0.197699	0.198392	0.19956	0.264651		0.209729	0.442724	0.481318	0.310997	0.400163	0.263745	0.228623	0.408199	0.304482	0.336549
3.12	0.136592	0.139818	0.393964	0.133787	0.256499	0.152789	0.205865	0.233769	0.223718	0.27976		0.213712	0.478132	0.442569	0.349422	0.423288	0.276069	0.2552	0.447191	0.341086	0.342259
3.25	0.136829	0.14792	0.380989	0.142995	0.285874	0.165693	0.201713	0.236923	0.224207	0.289383		0.24711	0.502395	0.443458	0.384194	0.44208	0.27546	0.259117	0.480019	0.391736	0.324121
3.38	0.135933	0.140915	0.409744	0.156894	0.302109	0.164238	0.210339	0.247991	0.240532	0.299459		0.285401	0.4971	0.451401	0.448275	0.44251	0.277661	0.240601	0.524919	0.435579	0.30151
3.51	0.13201	0.149273	0.45447	0.173944	0.333287	0.17782	0.223302	0.259169	0.252472	0.313493		0.323947	0.503312	0.474938	0.468552	0.451935	0.291487	0.263754	0.553649	0.453662	0.293015
3.64	0.134018	0.163995	0.469343	0.197102	0.354975	0.187732	0.233969	0.249241	0.271035	0.327766		0.296685	0.507553	0.498317	0.46238	0.448947	0.300014	0.319253	0.583621	0.471017	0.335056
3.77	0.132634	0.178545	0.46614	0.220757	0.384152	0.19645	0.250545	0.27579	0.310717	0.348248		0.265083	0.515478	0.499789	0.445535	0.422368	0.305382	0.333061	0.594404	0.514586	0.35762
3.9	0.139297	0.187891	0.484819	0.240682	0.419427	0.203936	0.24456	0.282481	0.34191	0.362719		0.243362	0.515786	0.49224	0.491008	0.381177	0.298883	0.358735	0.600425	0.583615	0.361203
4.03	0.147956	0.205271	0.516348	0.270026	0.447018	0.210603	0.26709	0.29793	0.3782	0.385682		0.259348	0.512995	0.47832	0.522622	0.338643	0.315883	0.416992	0.603479	0.619154	0.347853
4.16	0.151688	0.223399	0.508263	0.294827	0.468869	0.231442	0.271251	0.312251	0.410162	0.401376		0.26396	0.490325	0.4556	0.565181	0.304692	0.329522	0.462944	0.688408	0.637474	0.339089
4.29	0.165584	0.237356	0.502193	0.326299	0.494577	0.264117	0.252659	0.328045	0.441167	0.414114		0.270573	0.481789	0.423219	0.573138	0.292734	0.332897	0.544013	0.740193	0.625782	0.338184
4.42	0.189016	0.257213	0.486882	0.354645	0.519042	0.276842	0.272987	0.35034	0.483017	0.425964		0.291345	0.438448	0.399888	0.530539	0.302275	0.343301	0.606	0.706128	0.618626	0.344023
4.55	0.212156	0.291396	0.469718	0.38996	0.537141	0.29761	0.286222	0.351613	0.501376	0.443793		0.291442	0.414439	0.349548	0.480966	0.312818	0.351165	0.666702	0.630387	0.571606	0.326813
4.68	0.23844	0.314107	0.453454	0.426262	0.552928	0.317127	0.296848	0.380564	0.540548	0.457595		0.31255	0.450723	0.330744	0.470002	0.342333	0.347199	0.691595	0.55542	0.540693	0.333295
4.81	0.271918	0.338986	0.42732	0.456071	0.57033	0.332915	0.325384	0.406498	0.570685	0.471863		0.358938	0.448851	0.370458	0.477679	0.379651	0.398879	0.758902	0.51781	0.502386	0.357956
4.94	0.305362	0.376334	0.44779	0.487524	0.591106	0.353618	0.342892	0.449948	0.605862	0.48244		0.387923	0.454596	0.399089	0.441802	0.414832	0.435578	0.7407	0.522688	0.469404	0.36419
5.07	0.342189	0.404342	0.448735	0.517811	0.613039	0.372192	0.374221	0.468883	0.637365	0.490619		0.415505	0.461883	0.388468	0.411202	0.430718	0.410968	0.74788	0.482021	0.439443	0.363617
5.2	0.37665	0.439367	0.449311	0.561202	0.631745	0.400358	0.425585	0.503478	0.659772	0.487116		0.392654	0.42586	0.409532	0.412943	0.439185	0.381143	0.776798	0.437857	0.387692	0.337968
5.33	0.407242	0.48566	0.445462	0.602282	0.648067	0.427773	0.475948	0.513238	0.691091	0.490791		0.369206	0.39515	0.428933	0.391083	0.468902	0.328743	0.774188	0.384485	0.348087	0.346
5.46	0.443995	0.519431	0.458722	0.634792	0.667205	0.457386	0.517668	0.5775	0.717624	0.495051		0.368403	0.374369	0.414676	0.360991	0.490409	0.307873	0.705443	0.373538	0.335745	0.371164
5.59	0.46783	0.55774	0.48621	0.662721	0.678536	0.478879	0.564882	0.608086	0.739563	0.50184		0.380305	0.381061	0.403333	0.333189	0.456677	0.280964	0.697437	0.397897	0.333766	0.416269
5.72	0.502486	0.60096	0.490069	0.697581	0.695679	0.502757	0.585295	0.64523	0.75577	0.514116		0.370369	0.354981	0.365629	0.309639	0.410488	0.264208	0.623502	0.379363	0.329635	0.453669
5.85	0.540643	0.637058	0.515681	0.730791	0.713713	0.53153	0.618508	0.686113	0.767693	0.537866		0.406356	0.334439	0.340187	0.283724	0.378479	0.249522	0.584826	0.355927	0.304221	0.438258
5.98	0.573212	0.68176	0.542818	0.754176	0.721725	0.5603	0.668058	0.702973	0.785606	0.565214		0.416531	0.323048	0.34503	0.275528	0.360698	0.212074	0.597904	0.367427	0.27389	0.406457
6.11	0.613489	0.718253	0.540521	0.791344	0.749926	0.603359	0.700831	0.726829	0.790342	0.600603		0.473646	0.307948	0.353255	0.255989	0.363268	0.203126	0.574123	0.353169	0.263183	0.401181
6.24	0.649619	0.74426	0.583937	0.820295	0.762509	0.639232	0.745854	0.751595	0.805871	0.643472		0.55495	0.317865	0.362519	0.249069	0.378439	0.189773	0.555091	0.352481	0.273536	0.397538
6.37	0.679793	0.782791	0.59147	0.842812	0.776945	0.670751	0.783424	0.760206	0.820743	0.669761		0.610045	0.307876	0.377765	0.223982	0.374112	0.208845	0.505731	0.294296	0.260764	0.368984
6.5	0.708968	0.810517	0.597545	0.86334	0.793971	0.716047	0.795807	0.789339	0.823919	0.687599		0.608562	0.330914	0.368268	0.230732	0.381157	0.209287	0.487772	0.324306	0.22435	0.341504
6.63	0.728381	0.826363	0.590104	0.891899	0.807358	0.73252	0.830915	0.805576	0.849263	0.708096		0.587491	0.348258	0.344147	0.229637	0.375676	0.231764	0.485089	0.311242	0.209887	0.318234
6.76	0.749343	0.850359	0.613261	0.907551	0.804664	0.763116	0.85917	0.828897	0.856227	0.726402		0.592223	0.342065	0.33287	0.249124	0.348053	0.244066	0.465587	0.294666	0.190527	0.287606
6.89	0.757069	0.86097	0.613949	0.913365	0.808721	0.790041	0.875372	0.860551	0.856236	0.739961		0.59418	0.335552	0.29683	0.244417	0.336727	0.251795	0.474703	0.25386	0.189894	0.265772
7.02	0.764159	0.875466	0.658705	0.92596	0.807879	0.802814	0.871869	0.847291	0.868204	0.750929		0.593068	0.337868	0.283268	0.243113	0.34158	0.270723	0.449182	0.260295	0.206981	0.264644
7.15	0.757682	0.879442	0.689323	0.937181	0.807352	0.806452	0.892433	0.841851	0.863963	0.761372		0.58918	0.335387	0.272034	0.241628	0.333347	0.26807	0.477969	0.277155	0.206188	0.262464
7.28	0.755404	0.888427	0.66067	0.937286	0.80396	0.809	0.90023	0.843196	0.863029	0.765454		0.60587	0.349762	0.281595	0.220576	0.305566	0.254903	0.445014	0.26311	0.200875	0.272828
7.41	0.736569	0.893829	0.676697	0.924977	0.800053	0.816456	0.900683	0.822548	0.868636	0.763268		0.617845	0.369365	0.28675	0.215649	0.280211	0.223575	0.428716	0.278602	0.194915	0.279612
7.54	0.732163	0.887094	0.661578	0.920323	0.792199	0.809061	0.910188	0.797497	0.853993	0.760151		0.665133	0.36468	0.274088	0.215861	0.263316	0.2128	0.458812	0.294871	0.191793	0.275697
7.67	0.736355	0.891689	0.669352	0.910519	0.778897	0.801262	0.90583	0.817745	0.849259	0.759006		0.702291	0.342036	0.299072	0.220554	0.253749	0.21628	0.416247	0.295791	0.190641	0.281878
7.8	0.737663	0.897684	0.672702	0.897138	0.785308	0.778405	0.909441	0.80021	0.84504	0.748057		0.710987	0.340712	0.291372	0.214518	0.267724	0.222696	0.421846	0.306416	0.182144	0.284313
7.93	0.740228	0.890805	0.690351	0.873061	0.783084	0.73879	0.869996	0.781693	0.825984	0.743202		0.711981	0.347855	0.302566	0.221766	0.257769	0.217928	0.42149	0.301728	0.181185	0.274989
8.06	0.74582	0.8887	0.684105	0.846849	0.757288	0.724108	0.860205	0.789721	0.812754	0.739235		0.704888	0.355048	0.301702	0.220012	0.272394	0.246371	0.418219	0.346595	0.19265	0.280534
8.19	0.744411	0.870155	0.691702	0.83717	0.751054	0.686625	0.834735	0.780949	0.80686	0.724951		0.689829	0.374358	0.314746	0.225848	0.274447	0.271947	0.4096	0.361108	0.1839	0.292103
8.32	0.751571	0.864519	0.682222	0.80974	0.72705	0.649843	0.806433	0.751239	0.795913	0.704916		0.617522	0.383013	0.277961	0.215091	0.28727	0.303326	0.409479	0.3697	0.194665	0.323752
8.45	0.755361	0.845244	0.651324	0.789179	0.713659	0.617456	0.781247	0.721723	0.785327	0.690965		0.577285	0.37923	0.281734	0.225205	0.298619	0.339713	0.424614	0.345047	0.208491	0.309968
8.58	0.750448	0.818077	0.658751	0.758277	0.692513	0.583539	0.756102	0.716947	0.755907	0.675693		0.557317	0.379958	0.27888	0.257407	0.311976	0.372189	0.418574	0.33275	0.236241	0.300617
8.71	0.743275	0.799309	0.615468	0.735206	0.679542	0.53726	0.761869	0.652772	0.738291	0.658557		0.547042	0.370921	0.306062	0.263542	0.314854	0.380763	0.441461	0.33985	0.249221	0.306669
8.84	0.739298	0.771092	0.580533	0.70698	0.67242	0.517422	0.7099	0.64559	0.709479	0.649926		0.534691	0.38536	0.338487	0.288744	0.304923	0.387764	0.46873	0.31894	0.241801	0.317502
8.97	0.719821	0.759411	0.587426	0.676005	0.649282	0.50429	0.669183	0.608954	0.687982	0.644044		0.533703	0.383661	0.376613	0.296677	0.291322	0.385227	0.461127	0.297905	0.235891	0.35628
9.1	0.701117	0.728618	0.554573	0.644578	0.639026	0.484747	0.651785	0.550747	0.67742	0.64174		0.547899	0.371995	0.404776	0.283233	0.280486	0.357861	0.491301	0.284066	0.237696	0.405625
9.23	0.688252	0.696335	0.527608	0.598929	0.627362	0.462737	0.633987	0.524063	0.650108	0.636448		0.543696	0.367239	0.424619	0.292151	0.267339	0.357049	0.560318	0.306398	0.243826	0.423038
9.36	0.664549	0.65945	0.501756	0.569225	0.607314	0.434893	0.589606	0.478969	0.634608	0.629949		0.526488	0.365614	0.443662	0.300592	0.275368	0.363342	0.588248	0.300519	0.259162	0.415641
9.49	0.645577	0.626932	0.485205	0.531124	0.591692	0.411511	0.545583	0.464328	0.614275	0.625086		0.512982	0.378562	0.466804	0.330995	0.293461	0.382533	0.606775	0.361084	0.271869	0.409303
9.62	0.628063	0.588109	0.457123	0.496101	0.569176	0.394961	0.554642	0.421798	0.595257	0.615673		0.499626	0.404936	0.502862	0.3422	0.311791	0.364646	0.617604	0.373276	0.282036	0.406946
9.75	0.616204	0.536432	0.452893	0.447995	0.568427	0.366977	0.535762	0.395667	0.579456	0.598516		0.492235	0.437142	0.509623	0.343787	0.316904	0.352176	0.621405	0.366461	0.305184	0.41416
9.88	0.593182	0.506419	0.447105	0.411272	0.550748	0.353286	0.514231	0.394843	0.549976	0.591172		0.461064	0.510223	0.503699	0.360346	0.318606	0.325261	0.647931	0.410241	0.345761	0.421914
10.01	0.569206	0.461569	0.446019	0.367179	0.525306	0.331601	0.473607	0.376163	0.537682	0.577231		0.47445	0.543451	0.479687	0.375901	0.343105	0.290384	0.627166	0.416405	0.373272	0.400446
10.14	0.540895	0.430566	0.435168	0.326097	0.501136	0.313624	0.448197	0.352529	0.515027	0.564136		0.500887	0.568926	0.443358	0.412723	0.387259	0.297304	0.621329	0.439655	0.373801	0.385871
10.27	0.508955	0.403146	0.448634	0.281126	0.488887	0.293109	0.449184	0.307867	0.50725	0.547654		0.522675	0.606561	0.437038	0.45807	0.414799	0.301449	0.606191	0.43252	0.359302	0.382735
10.4	0.476072	0.369697	0.45468	0.243994	0.461755	0.276317	0.413414	0.288966	0.488705	0.523076		0.522994	0.579348	0.459627	0.51983	0.426843	0.34303	0.574853	0.44564	0.349523	0.383562
10.53	0.449598	0.346689	0.451193	0.214799	0.459874	0.269202	0.382835	0.278814	0.469631	0.496964		0.570278	0.520413	0.45526	0.547356	0.421513	0.376547	0.560367	0.480473	0.362322	0.352234
10.66	0.415465	0.315775	0.45811	0.190439	0.445195	0.246721	0.361876	0.284635	0.4508	0.469825		0.552141	0.498039	0.455513	0.5552	0.402038	0.394612	0.542889	0.486232	0.367116	0.341156
10.79	0.398923	0.28545	0.431917	0.164916	0.430387	0.233434	0.338636	0.277755	0.423221	0.447749		0.512391	0.446544	0.424232	0.527644	0.376941	0.418807	0.531217	0.476222	0.363333	0.342872
10.92	0.377353	0.266546	0.439354	0.147039	0.42046	0.200739	0.31642	0.267985	0.402324	0.42693		0.45829	0.466381	0.438248	0.505495	0.347663	0.450537	0.506889	0.462684	0.353427	0.339169
11.05	0.348748	0.243236	0.431386	0.129379	0.411593	0.19359	0.307753	0.253711	0.384533	0.402633		0.45435	0.458569	0.43378	0.471617	0.352597	0.433212	0.451339	0.42459	0.3629	0.337987
11.18	0.321526	0.229187	0.412056	0.114784	0.406252	0.182666	0.306109	0.258828	0.363317	0.38021		0.400203	0.470345	0.417399	0.445141	0.356953	0.417967	0.426663	0.402184	0.366381	0.342128
11.31	0.306978	0.209857	0.403847	0.105521	0.386775	0.174773	0.288336	0.239768	0.339881	0.362037		0.353473	0.5042	0.358104	0.38265	0.375723	0.399052	0.399824	0.375235	0.385063	0.350668
11.44	0.293881	0.200911	0.409741	0.0995298	0.364055	0.17624	0.299737	0.225769	0.32836	0.34412		0.333335	0.53052	0.314223	0.358083	0.384498	0.410541	0.393505	0.353392	0.3715	0.353568
11.57	0.272461	0.18618	0.345784	0.0947405	0.349199	0.175105	0.274515	0.232905	0.309455	0.328391		0.340098	0.539129	0.303739	0.383081	0.385789	0.370461	0.361958	0.362626	0.363147	0.346036
11.7	0.256774	0.175799	0.333742	0.094601	0.337299	0.16026	0.258131	0.224543	0.302821	0.30746		0.313774	0.508325	0.310406	0.379591	0.384065	0.331931	0.360316	0.34584	0.383796	0.34344
11.83	0.239059	0.169696	0.344178	0.0912816	0.324911	0.160079	0.23958	0.207454	0.290578	0.291791		0.310019	0.48258	0.327662	0.364255	0.372911	0.287952	0.328194	0.358602	0.399837	0.33672
11.96	0.228702	0.161778	0.317503	0.0930268	0.296015	0.156802	0.241226	0.200832	0.274964	0.274177		0.319659	0.473472	0.340754	0.338838	0.398021	0.258917	0.31422	0.385086	0.410599	0.337046
12.09	0.215441	0.156155	0.304555	0.0888059	0.286373	0.170143	0.213412	0.198871	0.269151	0.253162		0.314067	0.468338	0.329011	0.299231	0.462621	0.248763	0.292512	0.383887	0.407293	0.30534
12.22	0.198158	0.152791	0.285528	0.0879903	0.27322	0.169629	0.231466	0.210777	0.256967	0.239678		0.321291	0.389346	0.333566	0.250588	0.525401	0.251879	0.257707	0.384953	0.39512	0.27897
12.35	0.188719	0.155504	0.276851	0.0850378	0.269522	0.175005	0.207188	0.188391	0.249358	0.220516		0.315068	0.348669	0.311671	0.232738	0.584666	0.219242	0.265469	0.385445	0.40102	0.266289
12.48	0.175634	0.154935	0.264346	0.083133	0.253306	0.177273	0.20989	0.177088	0.23037	0.207703		0.287153	0.309186	0.301684	0.220206	0.584001	0.217471	0.263221	0.351565	0.393165	0.271513
12.61	0.164714	0.147994	0.275178	0.0874935	0.240443	0.175675	0.209418	0.190066	0.238038	0.202091		0.281913	0.279633	0.245993	0.215039	0.523834	0.222914	0.257495	0.345462	0.380048	0.279158
12.74	0.152905	0.145248	0.280434	0.0847973	0.224809	0.176313	0.193783	0.18	0.228326	0.194092		0.275508	0.265347	0.234011	0.210537	0.413042	0.234479	0.276909	0.313357	0.34596	0.291669
12.87	0.143102	0.145468	0.274733	0.0865982	0.221169	0.181524	0.193975	0.182373	0.228962	0.186301		0.24399	0.282534	0.226983	0.222595	0.335492	0.23669	0.251894	0.27302	0.283573	0.27591
13	0.141798	0.142129	0.262392	0.0805419	0.2227	0.178806	0.207005	0.169873	0.219636	0.181999		0.236512	0.285865	0.199278	0.200561	0.279221	0.21607	0.233293	0.257276	0.227499	0.287945
13.13	0.133108	0.142873	0.238333	0.0892892	0.211339	0.184051	0.200531	0.175141	0.223064	0.172458		0.228528	0.272656	0.201451	0.202941	0.252377	0.207652	0.235378	0.233731	0.205652	0.273815
13.26	0.125214	0.151193	0.242771	0.0857389	0.204222	0.18229	0.177419	0.16516	0.226571	0.163746		0.227517	0.265414	0.222453	0.198687	0.239465	0.230836	0.228611	0.256979	0.179217	0.242022
13.39	0.122435	0.143824	0.248303	0.0908873	0.199125	0.177495	0.182138	0.166927	0.22333	0.162487		0.209245	0.259193	0.207555	0.213675	0.233078	0.238388	0.244011	0.273544	0.168236	0.208079
13.52	0.113601	0.143982	0.234361	0.0853944	0.200821	0.17395	0.213594	0.15632	0.220137	0.162788		0.197201	0.25398	0.220456	0.20387	0.224474	0.224004	0.253223	0.303839	0.163226	0.172847
13.65	0.109669	0.144082	0.22064	0.0861824	0.194317	0.176623	0.1952	0.17877	0.212274	0.158751		0.189543	0.243229	0.211943	0.196854	0.209143	0.237438	0.23336	0.288909	0.160175	0.160171
13.78	0.104177	0.141128	0.231083	0.0868761	0.18392	0.181612	0.200972	0.168408	0.195686	0.152355		0.181473	0.24969	0.200598	0.211316	0.191808	0.244611	0.219489	0.27136	0.151962	0.154862
13.91	0.102327	0.139056	0.229471	0.0878379	0.185883	0.174823	0.209758	0.163452	0.196185	0.14608		0.183596	0.262812	0.179562	0.191327	0.176848	0.252956	0.206242	0.284177	0.142896	0.14582
14.04	0.101343	0.136375	0.244089	0.0887481	0.184011	0.169263	0.215927	0.154601	0.195009	0.140832		0.179056	0.293042	0.156501	0.20587	0.163196	0.247499	0.200679	0.287946	0.144691	0.155088
14.17	0.0979115	0.137027	0.239042	0.0907718	0.171774	0.161375	0.194476	0.143645	0.195837	0.134032		0.177665	0.291989	0.142652	0.199259	0.156945	0.236041	0.214497	0.297465	0.143743	0.143581
14.3		0.129845	0.258276	0.0857165	0.175597	0.160383	0.236883	0.149508	0.205736	0.13249		0.180497	0.285156	0.15558	0.207339	0.145037	0.23462	0.219514	0.298901	0.135048	0.142378
14.43				0.0868395	0.183539	0.154114	0.202822	0.145785	0.192157	0.127793		0.174052	0.281626	0.13649	0.209346	0.139936	0.224522	0.233106	0.326266	0.137376	0.141371
14.56				0.0902372	0.17968	0.149889	0.210455	0.160738	0.186152	0.123496		0.168433	0.274108	0.143789	0.215223	0.139921	0.226246	0.225736	0.342486	0.145845	0.145077
14.69				0.0943468	0.186235	0.148531	0.193941	0.142963	0.185719	0.122613		0.160921	0.272474	0.136072	0.213576	0.130549	0.225826	0.221693	0.340766	0.131083	0.139122
14.82				0.0837987	0.127036	0.148958	0.179714					0.165625	0.221256		0.194641	0.109689	0.212925	0.185087
14.95
15.08
15.21
15.34
15.47
15.6

## Sheet: ICRF
	HisH2HvD-mRFP1											CID-EGFP
0	0.232292	0.0962327	0.256572	0.26095	0.315744	0.274347	0.204565	0.0990281	0.202445	0.295326		0.397897	0.187402	0.219901	0.307189	0.391549	0.221286	0.18207	0.181324	0.313929	0.208312
0.13	0.268471	0.102987	0.267117	0.290022	0.34823	0.281963	0.221044	0.0950414	0.2193	0.298458		0.442802	0.199657	0.211994	0.383684	0.470671	0.234809	0.190577	0.1857	0.308456	0.256531
0.26	0.313877	0.0999115	0.274492	0.320556	0.38375	0.290166	0.237707	0.0902979	0.232558	0.319689		0.471598	0.18778	0.206866	0.467633	0.50246	0.245355	0.180201	0.181233	0.307491	0.311001
0.39	0.356809	0.0998374	0.281868	0.361812	0.411509	0.309432	0.235901	0.0894806	0.249752	0.339374		0.518334	0.194751	0.197424	0.512879	0.494235	0.270207	0.184187	0.225192	0.279429	0.367054
0.52	0.406702	0.0952794	0.288834	0.407892	0.466082	0.338153	0.245188	0.0932723	0.268879	0.385056		0.560427	0.20349	0.206565	0.52129	0.51162	0.290982	0.187515	0.20512	0.285726	0.435759
0.65	0.462899	0.10613	0.301754	0.436621	0.502615	0.332688	0.243898	0.0864243	0.299699	0.414573		0.596126	0.19181	0.234954	0.48846	0.510934	0.328225	0.195176	0.194139	0.332584	0.496329
0.78	0.504224	0.112749	0.323492	0.472068	0.540546	0.363954	0.255148	0.0818813	0.319099	0.454232		0.586187	0.200177	0.314127	0.433764	0.46846	0.361552	0.200582	0.205249	0.380471	0.523067
0.91	0.55624	0.0960395	0.347673	0.503235	0.567092	0.378904	0.250543	0.0813027	0.345337	0.493109		0.541696	0.216248	0.397992	0.402718	0.426922	0.366049	0.216467	0.20235	0.381576	0.502435
1.04	0.599748	0.101366	0.358779	0.52914	0.604852	0.386856	0.260393	0.0926226	0.369756	0.550842		0.529506	0.221595	0.462517	0.390141	0.423817	0.360709	0.221787	0.191812	0.360052	0.487895
1.17	0.638651	0.113128	0.403031	0.57227	0.655128	0.435841	0.270091	0.0865638	0.398118	0.572039		0.522201	0.235424	0.483919	0.375303	0.441869	0.368595	0.245556	0.179065	0.362914	0.50131
1.3	0.678452	0.112352	0.448778	0.603062	0.674961	0.469241	0.287258	0.0938762	0.43327	0.632335		0.517819	0.224807	0.485056	0.334268	0.458537	0.405526	0.259542	0.188426	0.428253	0.529269
1.43	0.72482	0.11823	0.480177	0.637732	0.712324	0.497123	0.288167	0.0926842	0.47429	0.670363		0.467845	0.228317	0.454556	0.291691	0.438872	0.42942	0.265697	0.220038	0.47408	0.555589
1.56	0.773397	0.121842	0.508234	0.647555	0.749657	0.524097	0.313543	0.0968016	0.507573	0.701129		0.411279	0.226901	0.402134	0.290889	0.395072	0.453174	0.244828	0.202905	0.49761	0.564639
1.69	0.796162	0.115067	0.536017	0.659465	0.780276	0.539816	0.341033	0.109756	0.55377	0.757196		0.356881	0.225787	0.392545	0.276434	0.375912	0.472572	0.221746	0.245905	0.497541	0.532854
1.82	0.816508	0.110255	0.572025	0.68576	0.795273	0.562416	0.36093	0.117287	0.598047	0.796156		0.318808	0.238103	0.397825	0.266251	0.323038	0.494016	0.261265	0.301488	0.502303	0.461455
1.95	0.845699	0.118322	0.599036	0.712691	0.808269	0.599051	0.388529	0.14662	0.642009	0.826357		0.296026	0.248211	0.379853	0.269815	0.274078	0.535026	0.288749	0.328574	0.48448	0.391549
2.08	0.864086	0.122697	0.627623	0.709126	0.802514	0.624908	0.40405	0.172137	0.684163	0.852634		0.280958	0.2379	0.349232	0.312895	0.244752	0.496054	0.334266	0.351021	0.429981	0.377103
2.21	0.861935	0.126573	0.661657	0.701851	0.824736	0.660879	0.406414	0.191932	0.717611	0.880711		0.262573	0.241055	0.339398	0.354636	0.235824	0.422706	0.343205	0.372431	0.351549	0.362363
2.34	0.868592	0.120489	0.680759	0.700559	0.818963	0.660964	0.408783	0.22593	0.74936	0.894272		0.228599	0.24071	0.344835	0.358289	0.23475	0.397713	0.320482	0.359124	0.299647	0.361396
2.47	0.857996	0.125608	0.70253	0.696395	0.797153	0.699418	0.437709	0.263636	0.768628	0.902257		0.201034	0.257583	0.336352	0.347012	0.229515	0.383902	0.293726	0.293355	0.255996	0.368498
2.6	0.854194	0.13394	0.691875	0.702064	0.78168	0.699566	0.444277	0.296506	0.779949	0.914949		0.194321	0.268524	0.346444	0.334334	0.193683	0.347509	0.301493	0.265104	0.225871	0.377549
2.73	0.821316	0.138985	0.696858	0.698465	0.761296	0.710353	0.462922	0.322345	0.784867	0.925089		0.187059	0.262591	0.351625	0.352259	0.174163	0.309667	0.325338	0.246714	0.197926	0.37348
2.86	0.794138	0.146247	0.705875	0.69378	0.731651	0.719592	0.484038	0.337631	0.782834	0.910503		0.198118	0.268097	0.34191	0.352323	0.160114	0.269744	0.349127	0.229834	0.196157	0.334136
2.99	0.765496	0.156996	0.707502	0.688969	0.700756	0.721697	0.516023	0.361268	0.777729	0.894509		0.20936	0.284419	0.319873	0.33183	0.157429	0.245693	0.366556	0.253958	0.180491	0.281586
3.12	0.737484	0.168745	0.690164	0.670974	0.670801	0.737213	0.539241	0.380961	0.757773	0.883704		0.199995	0.289173	0.295762	0.281264	0.150703	0.228885	0.397582	0.323601	0.176572	0.252802
3.25	0.679829	0.183552	0.683459	0.647695	0.627758	0.75915	0.594411	0.400371	0.734422	0.834697		0.184396	0.321905	0.257155	0.248683	0.150947	0.210883	0.428365	0.386682	0.168911	0.236389
3.38	0.651009	0.18955	0.663381	0.611789	0.60083	0.768578	0.610488	0.417243	0.702256	0.798192		0.1668	0.364886	0.226914	0.236962	0.143476	0.220435	0.403075	0.45821	0.16762	0.22593
3.51	0.60792	0.203603	0.662238	0.596113	0.557775	0.76413	0.637787	0.444222	0.674878	0.763499		0.153405	0.405387	0.207986	0.228583	0.132788	0.221007	0.365708	0.534572	0.162459	0.207073
3.64	0.553942	0.224693	0.641625	0.589414	0.529092	0.759137	0.660572	0.477676	0.636503	0.691674		0.1441	0.44042	0.186659	0.2224	0.123769	0.213189	0.334392	0.537593	0.161515	0.204899
3.77	0.516648	0.240864	0.610742	0.5791	0.496472	0.778785	0.666299	0.525219	0.593236	0.624997		0.141723	0.421175	0.177041	0.209746	0.123003	0.23038	0.34355	0.518158	0.14801	0.193195
3.9	0.480898	0.261462	0.599556	0.561229	0.446484	0.788234	0.681722	0.566784	0.576781	0.581281		0.130275	0.416994	0.160065	0.183176	0.117503	0.222934	0.374903	0.505181	0.153491	0.202784
4.03	0.442383	0.277694	0.571821	0.549073	0.418908	0.786454	0.710056	0.6181	0.530755	0.548665		0.123414	0.461641	0.145404	0.180803	0.119328	0.223441	0.376136	0.517242	0.154591	0.197345
4.16	0.402366	0.299047	0.549552	0.530351	0.40404	0.792402	0.710303	0.664607	0.496928	0.501816		0.122101	0.554812	0.14545	0.178745	0.10941	0.21919	0.320867	0.525014	0.132235	0.191419
4.29	0.368345	0.323059	0.521195	0.514559	0.382715	0.784171	0.728034	0.710839	0.465398	0.456356		0.109513	0.610308	0.138592	0.179304	0.0919863	0.201367	0.262186	0.535718	0.122145	0.173187
4.42	0.328014	0.338283	0.503264	0.493014	0.36302	0.776638	0.756562	0.718854	0.450208	0.43135		0.108525	0.564214	0.128385	0.177495	0.0969559	0.187226	0.245954	0.438658	0.111698	0.166088
4.55	0.313894	0.359822	0.472835	0.477552	0.345845	0.782081	0.763295	0.722795	0.430033	0.403014		0.110793	0.520836	0.140627	0.17283	0.0966615	0.17107	0.230305	0.350051	0.11088	0.182603
4.68	0.296089	0.382835	0.466489	0.451142	0.341084	0.770803	0.761209	0.715021	0.394011	0.385849		0.110434	0.486284	0.142318	0.155159	0.0966464	0.167006	0.190656	0.259765	0.102873	0.183742
4.81	0.283338	0.406855	0.460528	0.429847	0.313348	0.772425	0.756754	0.699975	0.373253	0.357003		0.114121	0.421808	0.145591	0.149829	0.0946805	0.16537	0.199815	0.250406	0.101501	0.175581
4.94	0.265756	0.427477	0.436008	0.409663	0.309256	0.734839	0.752064	0.681331	0.350393	0.336169		0.101798	0.34071	0.134544	0.142835	0.0959731	0.146972	0.207649	0.243713	0.105341	0.174365
5.07	0.25726	0.45538	0.416863	0.39956	0.287107	0.732943	0.717363	0.652481	0.320871	0.310704		0.110145	0.312425	0.121945	0.132973	0.0926816	0.147572	0.20022	0.217838	0.0917071	0.150677
5.2	0.241934	0.473585	0.421408	0.376198	0.282632	0.710738	0.700652	0.624566	0.30613	0.301501		0.108141	0.291672	0.112559	0.128612	0.0986464	0.145332	0.20304	0.209975	0.0914736	0.126581
5.33	0.244993	0.501925	0.415555	0.346728	0.280719	0.701688	0.685009	0.597326	0.286188	0.302545		0.100349	0.286382	0.110632	0.128446	0.0952895	0.131366	0.23366	0.220851	0.0955057	0.119975
5.46	0.226832	0.533851	0.396551	0.33655	0.259221	0.700054	0.654482	0.570823	0.267531	0.284189		0.098363	0.308579	0.10842	0.122191	0.095272	0.131229	0.212804	0.23297	0.0863047	0.11776
5.59	0.213752	0.554387	0.399726	0.329391	0.250389	0.674895	0.633081	0.526461	0.249468	0.288121		0.097226	0.300472	0.104589	0.123811	0.0901106	0.12938	0.200251	0.262268	0.0963861	0.109682
5.72	0.201679	0.582816	0.386643	0.312434	0.239423	0.664175	0.599938	0.48835	0.235451	0.277485		0.0936509	0.288211	0.101536	0.124838	0.092515	0.125428	0.20037	0.231584	0.0904472	0.10485
5.85	0.202333	0.60476	0.38173	0.316356	0.245937	0.652115	0.579173	0.452682	0.231015	0.286353		0.103155	0.263587	0.101814	0.119625	0.0897252	0.124904	0.212895	0.230875	0.0861282	0.0977974
5.98	0.189597	0.637411	0.372936	0.325737	0.243895	0.644278	0.558765	0.416698	0.221953	0.260618		0.11147	0.256095	0.0889978	0.118081	0.0857581	0.118703	0.200793	0.217647	0.0924201	0.107637
6.11	0.181937	0.68082	0.370291	0.316063	0.228175	0.630077	0.536339	0.38572	0.213985	0.256526		0.104855	0.253109	0.090063	0.116201	0.0860956	0.120194	0.193794	0.195403	0.0920089	0.104503
6.24	0.17729	0.708798	0.367882	0.312997	0.212792	0.639971	0.512312	0.352249	0.21113	0.255782		0.104639	0.250751	0.100674	0.110114	0.0834727	0.119866	0.203745	0.202841	0.0837121	0.0917403
6.37	0.168944	0.741891	0.379602	0.314398	0.211746	0.647769	0.496199	0.304171	0.215003	0.245743		0.0972702	0.277388	0.0966527	0.111776	0.0937512	0.115201	0.204498	0.192026	0.0830429	0.0915506
6.5	0.172895	0.766823	0.375681	0.309427	0.210096	0.614406	0.479212	0.271966	0.211737	0.23323		0.0958586	0.252452	0.0984279	0.121596	0.0892519	0.118642	0.201128	0.19331	0.0802586	0.0879721
6.63	0.168924	0.796627	0.379409	0.304744	0.201438	0.626154	0.465582	0.251958	0.215126	0.210424		0.102767	0.262178	0.0852138	0.122288	0.0824259	0.122542	0.18411	0.183764	0.0849389	0.0864445
6.76	0.16779	0.808418	0.37156	0.295518	0.196744	0.618641	0.469007	0.244713	0.227241	0.176025		0.0990583	0.264477	0.0870296	0.124478	0.0935584	0.11584	0.206678	0.192551	0.0792785	0.0842689
6.89	0.163496	0.81708	0.355889	0.29588	0.202816	0.623309	0.477055	0.227415	0.231321	0.170671		0.0953295	0.273139	0.0872339	0.118659	0.0909724	0.117388	0.191074	0.180271	0.0829377	0.0963664
7.02	0.157368	0.830087	0.375073	0.308742	0.201784	0.620226	0.469775	0.220085	0.22899	0.158839		0.0883976	0.268739	0.0944205	0.120124	0.0925457	0.117019	0.190326	0.179348	0.0821746	0.0862971
7.15	0.155722	0.824145	0.362679	0.301982	0.188237	0.603532	0.453663	0.218455	0.228319	0.181722		0.095748	0.26434	0.0844885	0.117924	0.0819072	0.112981	0.194874	0.161617	0.0795491	0.0845695
7.28	0.152727	0.834083	0.365882	0.292881	0.186598	0.610148	0.448461	0.205363	0.231488	0.164462		0.0989066	0.27861	0.0794767	0.118368	0.0857957	0.113512	0.193762	0.164849	0.0829286	0.0930973
7.41	0.161214	0.841313	0.369213	0.287082	0.191223	0.600889	0.451453	0.210328	0.246301	0.177798		0.0957337	0.273983	0.0820915	0.120355	0.0894207	0.114492	0.205467	0.195972	0.0835552	0.0920966
7.54	0.1591	0.826207	0.35295	0.28552	0.187224	0.596492	0.452626	0.209648	0.249215	0.179908		0.0920051	0.275216	0.0857047	0.120981	0.0904267	0.109903	0.215363	0.190601	0.0773263	0.08927
7.67	0.158455	0.830214	0.346209	0.291725	0.184035	0.586594	0.441119	0.215066	0.257512	0.171891		0.0941654	0.263171	0.086508	0.119799	0.086574	0.114753	0.228957	0.17677	0.0863243	0.0956911
7.8	0.164066	0.830127	0.328956	0.296992	0.193046	0.597672	0.43922	0.20232	0.257045	0.170793		0.0955943	0.277829	0.0873797	0.117215	0.0964153	0.117605	0.218833	0.172294	0.0848895	0.0916799
7.93	0.164137	0.811734	0.335139	0.302946	0.190355	0.570981	0.432811	0.197326	0.270864	0.18754		0.0949224	0.278555	0.0819538	0.122596	0.09856	0.120754	0.213137	0.159532	0.0757952	0.093807
8.06	0.171739	0.796862	0.318664	0.298067	0.199923	0.564725	0.446672	0.190801	0.257717	0.198839		0.0990567	0.280753	0.082151	0.121516	0.0922189	0.124303	0.209061	0.162586	0.0919015	0.0797279
8.19	0.1812	0.783898	0.330005	0.30997	0.20249	0.566399	0.45351	0.198144	0.279286	0.21358		0.10497	0.304432	0.0795409	0.129335	0.0977084	0.118113	0.219014	0.171299	0.0841299	0.0847664
8.32	0.186147	0.769862	0.342505	0.313816	0.201383	0.546005	0.452943	0.213039	0.276959	0.207855		0.0945071	0.314793	0.0861225	0.124949	0.100499	0.118205	0.261227	0.1529	0.0773793	0.0921279
8.45	0.175076	0.747911	0.336534	0.321747	0.207252	0.568538	0.487019	0.227172	0.276413	0.18978		0.105243	0.264084	0.0883433	0.121299	0.0863819	0.123093	0.256964	0.16481	0.0806705	0.0929781
8.58	0.181268	0.739305	0.355821	0.317674	0.203305	0.56517	0.523356	0.246524	0.306603	0.204925		0.0998204	0.243888	0.0822362	0.113014	0.0952727	0.115547	0.237258	0.175105	0.083097	0.0869245
8.71	0.194375	0.724623	0.349351	0.324291	0.217423	0.570155	0.530937	0.275565	0.319066	0.228451		0.10682	0.228994	0.0844491	0.120418	0.0984829	0.116901	0.242273	0.169978	0.0820639	0.0899715
8.84	0.195149	0.710774	0.359731	0.337731	0.232778	0.572324	0.543467	0.301576	0.325158	0.231194		0.0923732	0.240307	0.0870201	0.12886	0.0954198	0.114959	0.254355	0.145363	0.078643	0.0911073
8.97	0.197831	0.697176	0.359902	0.346964	0.23591	0.574031	0.572403	0.354734	0.351524	0.228469		0.0966964	0.244788	0.0844732	0.132259	0.0930318	0.119181	0.246259	0.160991	0.0739379	0.0935138
9.1	0.195489	0.679003	0.366824	0.350008	0.241649	0.553016	0.581584	0.412887	0.38273	0.227626		0.0987328	0.236754	0.0946321	0.127932	0.0918224	0.120576	0.241008	0.172718	0.0798256	0.099371
9.23	0.215328	0.644942	0.37439	0.382742	0.264401	0.536878	0.600164	0.484274	0.402324	0.242625		0.0946906	0.221707	0.0977326	0.134899	0.0933455	0.119206	0.235295	0.175391	0.0818152	0.0979919
9.36	0.220005	0.620735	0.407041	0.37774	0.270437	0.555458	0.623557	0.559268	0.408572	0.24008		0.0957225	0.238211	0.0959507	0.150967	0.0965996	0.12169	0.246523	0.170624	0.0897626	0.0974923
9.49	0.231936	0.588424	0.417614	0.397546	0.286739	0.551706	0.647923	0.639825	0.443867	0.263493		0.0956373	0.245387	0.0939318	0.164294	0.0940566	0.128008	0.239646	0.190612	0.0914553	0.101932
9.62	0.241803	0.557284	0.456117	0.414995	0.286995	0.57382	0.678143	0.707715	0.481481	0.253533		0.0948011	0.257903	0.0855663	0.154563	0.099335	0.124104	0.24415	0.199126	0.0875598	0.108019
9.75	0.259189	0.525961	0.489606	0.425085	0.290921	0.555875	0.711618	0.74949	0.528174	0.259422		0.0985289	0.285741	0.0881636	0.158416	0.095848	0.129352	0.253007	0.182638	0.103418	0.0990251
9.88	0.294254	0.492529	0.524781	0.436001	0.317953	0.550653	0.718714	0.77795	0.563294	0.269477		0.104734	0.288953	0.0917975	0.16446	0.0998017	0.134662	0.252009	0.186077	0.0997753	0.105237
10.01	0.318239	0.471606	0.553398	0.456522	0.337935	0.571306	0.729985	0.808395	0.590544	0.287653		0.0963293	0.283257	0.0968541	0.171752	0.0954816	0.132205	0.235991	0.197754	0.0947181	0.109279
10.14	0.343731	0.442057	0.59125	0.479988	0.35834	0.563995	0.749314	0.845224	0.652457	0.281441		0.107017	0.280248	0.102566	0.183662	0.0978177	0.131853	0.214304	0.190273	0.0953691	0.110945
10.27	0.374814	0.420216	0.604227	0.51211	0.38236	0.568285	0.756809	0.847187	0.684697	0.287421		0.110985	0.341147	0.112113	0.19495	0.106266	0.137107	0.214102	0.20501	0.108853	0.114799
10.4	0.402277	0.395033	0.634448	0.536298	0.401475	0.571802	0.770632	0.84797	0.72047	0.314988		0.100219	0.36575	0.121635	0.185777	0.112746	0.151116	0.235432	0.20946	0.11561	0.134
10.53	0.455087	0.381406	0.669628	0.548283	0.430589	0.600708	0.780528	0.84771	0.75393	0.350429		0.102358	0.392682	0.118161	0.190408	0.125288	0.160288	0.259459	0.241443	0.12167	0.143138
10.66	0.454994	0.355364	0.687348	0.575596	0.451581	0.617167	0.78327	0.827712	0.786576	0.367283		0.110243	0.41584	0.129749	0.198908	0.123059	0.176834	0.281522	0.252321	0.125861	0.169303
10.79	0.490711	0.331222	0.720446	0.616526	0.498388	0.60238	0.80192	0.791511	0.829548	0.367585		0.115369	0.412921	0.143534	0.199587	0.119383	0.204236	0.273812	0.264524	0.122296	0.168191
10.92	0.524539	0.307047	0.742375	0.631593	0.547728	0.590683	0.79103	0.749425	0.836149	0.425108		0.121574	0.428572	0.149078	0.202277	0.126495	0.217672	0.248856	0.29866	0.131198	0.151508
11.05	0.560288	0.29086	0.766802	0.671699	0.583191	0.608872	0.792031	0.696246	0.863794	0.449569		0.121644	0.450808	0.150392	0.211201	0.141448	0.23117	0.271624	0.339096	0.132602	0.143125
11.18	0.581083	0.270071	0.769847	0.711624	0.625674	0.589278	0.768486	0.63621	0.881003	0.503436		0.131692	0.465668	0.153878	0.216252	0.145025	0.239833	0.27869	0.393711	0.13834	0.147527
11.31	0.621354	0.260104	0.789417	0.719465	0.668005	0.581388	0.751672	0.568701	0.888811	0.538238		0.142888	0.472711	0.173896	0.215232	0.130245	0.251315	0.305692	0.456652	0.150437	0.155318
11.44	0.654628	0.247515	0.796669	0.742878	0.723964	0.570105	0.73205	0.506933	0.886072	0.579629		0.13939	0.444619	0.213475	0.228056	0.1285	0.243274	0.373729	0.498692	0.15232	0.160612
11.57	0.67447	0.237437	0.788057	0.753605	0.750405	0.583721	0.725693	0.445525	0.896128	0.616063		0.149991	0.431202	0.215266	0.227586	0.128849	0.2491	0.414322	0.56744	0.15353	0.175033
11.7	0.706724	0.235097	0.793645	0.792788	0.796312	0.571318	0.696607	0.379184	0.914723	0.654558		0.152277	0.427888	0.199318	0.244903	0.137332	0.245067	0.400589	0.566291	0.161481	0.169717
11.83	0.731296	0.217346	0.795877	0.781889	0.825411	0.576341	0.670938	0.341661	0.904438	0.664477		0.156798	0.421646	0.178819	0.27322	0.139973	0.249662	0.431043	0.542294	0.188912	0.158286
11.96	0.754669	0.207371	0.773281	0.801078	0.844665	0.587909	0.654765	0.311662	0.895799	0.714392		0.17585	0.40303	0.171978	0.292587	0.141102	0.25396	0.424887	0.532075	0.203928	0.164604
12.09	0.788798	0.197711	0.781081	0.791468	0.87225	0.569591	0.613042	0.276152	0.879776	0.758551		0.181019	0.366352	0.17604	0.311965	0.15098	0.260261	0.414849	0.510848	0.227308	0.158203
12.22	0.78363	0.188562	0.761538	0.79791	0.875612	0.565345	0.570408	0.238426	0.855466	0.775763		0.195707	0.388948	0.20411	0.333539	0.165577	0.275705	0.439405	0.49947	0.257555	0.153945
12.35	0.791285	0.176138	0.748388	0.791048	0.895933	0.567381	0.552371	0.206529	0.842085	0.77566		0.218344	0.426904	0.225479	0.364727	0.16734	0.297812	0.478474	0.476032	0.29062	0.169925
12.48	0.814983	0.167892	0.731887	0.760894	0.905429	0.539792	0.483847	0.178915	0.807418	0.772141		0.264812	0.418267	0.232521	0.376505	0.165401	0.329512	0.417959	0.477339	0.322194	0.186973
12.61	0.810033	0.160941	0.710602	0.730768	0.913363	0.510303	0.450906	0.152358	0.781245	0.766307		0.319043	0.365852	0.26023	0.379515	0.175095	0.365079	0.374554	0.501362	0.383757	0.200952
12.74	0.810534	0.150953	0.688374	0.708294	0.899902	0.506235	0.415663	0.13562	0.745183	0.76199		0.360611	0.324647	0.294666	0.381911	0.189873	0.392778	0.347611	0.485436	0.448487	0.227582
12.87	0.807854	0.12928	0.66056	0.677796	0.892006	0.462628	0.371586	0.112384	0.709458	0.777711		0.381839	0.29961	0.351018	0.385109	0.207493	0.422406	0.364878	0.426644	0.471572	0.262107
13	0.771566	0.118156	0.632826	0.651717	0.866936	0.453226	0.32078	0.0966464	0.654584	0.756534		0.372181	0.285544	0.428363	0.4031	0.235926	0.417873	0.410182	0.419369	0.474553	0.292594
13.13	0.751396	0.121659	0.61036	0.621396	0.827082	0.434063	0.29009	0.0808784	0.615508	0.720748		0.370277	0.283776	0.482744	0.426759	0.275181	0.398552	0.487596	0.349754	0.483934	0.309446
13.26	0.726349	0.117241	0.568378	0.580964	0.803484	0.425594	0.280621	0.081713	0.578163	0.679688		0.379213	0.234704	0.497214	0.45442	0.323195	0.420196	0.479282	0.270545	0.453118	0.364777
13.39	0.699214	0.11558	0.539842	0.539342	0.761502	0.404126	0.249988	0.0711497	0.537309	0.639442		0.420622	0.223637	0.488057	0.496243	0.381536	0.448043	0.473787	0.23823	0.455765	0.402465
13.52	0.655301	0.102983	0.502443	0.503872	0.707402	0.392854	0.240505	0.0654882	0.499225	0.592808		0.483117	0.232577	0.46081	0.525185	0.421908	0.464462	0.507463	0.224183	0.469645	0.437362
13.65	0.616904	0.0976513	0.49183	0.459198	0.649008	0.354876	0.23873	0.0650976	0.461456	0.56199		0.496032	0.227661	0.449511	0.499367	0.428032	0.441754	0.435279	0.202228	0.493811	0.515798
13.78	0.592191	0.0971267	0.452967	0.408228	0.606521	0.339345	0.217665	0.0662144	0.408828	0.51547		0.499542	0.215644	0.452791	0.476204	0.417755	0.387468	0.337804	0.198219	0.536074	0.593725
13.91	0.554156	0.0944001	0.432672	0.367448	0.537179	0.330728	0.218571	0.0649199	0.368912	0.454163		0.515318	0.203499	0.433995	0.484324	0.412203	0.331094	0.253214	0.207408	0.496524	0.630017
14.04	0.512799	0.0916029	0.415303	0.318597	0.49604	0.30705	0.229451	0.0690865	0.341161	0.396132		0.508556	0.206553	0.447158	0.477143	0.398534	0.315627	0.251819	0.174946	0.403389	0.649862
14.17	0.473093	0.0932346	0.392331	0.297208	0.45817	0.291741	0.210508	0.0610929	0.296319	0.377985		0.515023	0.21009	0.429884	0.441844	0.411939	0.318878	0.225855	0.207578	0.34032	0.648338
14.3	0.447825	0.0929696	0.381643	0.25774	0.404378	0.290531	0.203503	0.0594474	0.257426	0.336069		0.503334	0.213999	0.405871	0.423169	0.470738	0.305205	0.21287	0.19419	0.337864	0.619425
14.43	0.417835	0.0933383	0.349337	0.232225	0.357314	0.275653	0.19906	0.0590783	0.23607	0.279155		0.493202	0.198103	0.379296	0.385349	0.552708	0.304571	0.22731	0.174551	0.328662	0.597367
14.56	0.385008	0.0970117	0.341369	0.218662	0.325963	0.235534	0.179899	0.0584731	0.202165	0.249187		0.492758	0.207657	0.346289	0.344101	0.585274	0.304768	0.222514	0.184117	0.333294	0.540977
14.69	0.353394	0.0935819	0.286471	0.19857	0.294486	0.236372	0.175185	0.0622814	0.174611	0.220161		0.488968	0.206445	0.313744	0.303755	0.543754	0.297142	0.228707	0.200206	0.326308	0.461818
14.82		0.085246	0.27676	0.186899	0.227392	0.227403	0.142252	0.0370345	0.1081	0.203664			0.20171	0.292368	0.257773	0.398719	0.242504	0.247664	0.152552	0.247555	0.361857
14.95		0.229039
15.08
15.21
15.34
15.47
15.6

## Sheet: TEV+ICRF
	HisH2HvD-mRFP1											CID-EGFP
0	0.145838	0.21381	0.1609	0.0904401	0.22987	0.243736	0.149421	0.117694	0.1924	0.125648		0.133633	0.27332	0.193587	0.10701	0.230029	0.165804	0.222578	0.250779	0.196106	0.149116
0.13	0.143363	0.218988	0.160918	0.0962844	0.224551	0.229769	0.151916	0.124271	0.209606	0.121403		0.132146	0.274454	0.201826	0.103961	0.282258	0.172491	0.230402	0.229323	0.190829	0.150784
0.26	0.144811	0.218532	0.162643	0.0879832	0.238687	0.235208	0.157568	0.117436	0.212397	0.118369		0.138859	0.278525	0.191578	0.104787	0.302411	0.181871	0.253254	0.225275	0.196171	0.150535
0.39	0.14231	0.243436	0.146526	0.0887531	0.254116	0.237147	0.15311	0.120044	0.205643	0.121875		0.157247	0.294378	0.191857	0.101184	0.323389	0.176188	0.270536	0.228769	0.192905	0.142043
0.52	0.145697	0.230667	0.14355	0.0924733	0.257934	0.246928	0.152623	0.115836	0.216054	0.124461		0.163578	0.315426	0.189699	0.108581	0.323438	0.166085	0.260451	0.21952	0.210104	0.147012
0.65	0.147915	0.242576	0.148394	0.0885616	0.275466	0.235689	0.157584	0.127858	0.219045	0.124432		0.168576	0.329769	0.187415	0.110912	0.328696	0.162419	0.247822	0.225465	0.231733	0.14639
0.78	0.146317	0.254256	0.13977	0.0877122	0.296553	0.23812	0.160232	0.12803	0.246077	0.126319		0.1782	0.382753	0.179551	0.110842	0.372669	0.172473	0.233126	0.208486	0.252941	0.145081
0.91	0.152612	0.24983	0.136408	0.0873556	0.298502	0.248976	0.165002	0.135652	0.246672	0.134034		0.178612	0.431911	0.204197	0.109802	0.420325	0.170365	0.227067	0.219541	0.275172	0.143248
1.04	0.145948	0.259685	0.136292	0.0874999	0.317371	0.242386	0.16078	0.140304	0.245374	0.124964		0.156625	0.489906	0.213414	0.110915	0.428226	0.169263	0.232177	0.224385	0.253931	0.138854
1.17	0.143662	0.289068	0.142739	0.0900195	0.334363	0.222323	0.147503	0.140285	0.262262	0.140296		0.146621	0.523439	0.200274	0.109797	0.438615	0.171892	0.234348	0.233351	0.280338	0.137127
1.3	0.142907	0.293898	0.153551	0.0818362	0.349546	0.245341	0.148418	0.141703	0.276575	0.135715		0.14215	0.588659	0.185113	0.108484	0.455738	0.178163	0.227246	0.249151	0.304989	0.166713
1.43	0.141494	0.308561	0.152139	0.0813498	0.3649	0.232014	0.14717	0.156781	0.272628	0.143912		0.157492	0.66119	0.194572	0.113189	0.462534	0.178956	0.222262	0.251877	0.32345	0.197591
1.56	0.137418	0.325695	0.147625	0.0883399	0.398119	0.231511	0.151093	0.159612	0.279468	0.153903		0.163225	0.711005	0.189042	0.124004	0.44104	0.195521	0.244475	0.260311	0.281337	0.269521
1.69	0.136873	0.350673	0.139788	0.0878719	0.413946	0.225036	0.153155	0.167438	0.29733	0.155904		0.156392	0.716088	0.20466	0.132215	0.395457	0.216776	0.239037	0.2771	0.276453	0.320656
1.82	0.137713	0.352054	0.158568	0.0869697	0.430214	0.220105	0.153741	0.178685	0.304465	0.162326		0.156194	0.663756	0.235272	0.150162	0.361808	0.252994	0.267977	0.314424	0.280337	0.344693
1.95	0.146062	0.356277	0.165307	0.0908382	0.454427	0.217489	0.144723	0.196585	0.315337	0.158695		0.175597	0.603559	0.252831	0.174555	0.320926	0.311822	0.321099	0.352258	0.282547	0.333027
2.08	0.140384	0.356293	0.155722	0.0905021	0.464875	0.214015	0.156268	0.217034	0.332602	0.16638		0.208236	0.551019	0.280972	0.203372	0.298544	0.362307	0.392009	0.409824	0.32061	0.314965
2.21	0.145439	0.361392	0.153455	0.102577	0.481576	0.221566	0.158194	0.230863	0.341758	0.178184		0.226064	0.518454	0.330706	0.233955	0.289544	0.421603	0.449625	0.469064	0.356867	0.317168
2.34	0.147399	0.366314	0.175623	0.110545	0.492866	0.210104	0.159458	0.252311	0.362806	0.209065		0.232545	0.487661	0.378945	0.242579	0.259684	0.468081	0.469684	0.529064	0.405339	0.3442
2.47	0.151618	0.372432	0.170597	0.125074	0.508115	0.216487	0.153066	0.276264	0.354613	0.216238		0.220174	0.439663	0.400069	0.247715	0.234759	0.529309	0.460263	0.568876	0.446068	0.392875
2.6	0.160883	0.357608	0.165029	0.14186	0.525465	0.221462	0.16654	0.307762	0.380994	0.226285		0.221269	0.419047	0.418094	0.256328	0.224546	0.558626	0.431159	0.58292	0.492488	0.421826
2.73	0.165457	0.367871	0.180778	0.152845	0.52984	0.21692	0.170722	0.32801	0.408094	0.25528		0.226329	0.39021	0.44898	0.274811	0.223628	0.52275	0.412647	0.6205	0.533985	0.431814
2.86	0.169835	0.361367	0.205496	0.155881	0.542528	0.220994	0.190851	0.377993	0.430259	0.285548		0.24454	0.36616	0.473643	0.30964	0.227923	0.485155	0.424027	0.629973	0.547378	0.436585
2.99	0.182941	0.37601	0.214275	0.168445	0.561013	0.226741	0.196345	0.397683	0.437044	0.310243		0.250366	0.343143	0.476758	0.324042	0.255026	0.45365	0.474807	0.592785	0.499769	0.409879
3.12	0.19509	0.38674	0.227081	0.172838	0.582537	0.243856	0.208881	0.431123	0.451483	0.337411		0.230697	0.347455	0.484576	0.347613	0.26915	0.395777	0.472559	0.546144	0.490147	0.367731
3.25	0.207774	0.385438	0.226296	0.194619	0.595966	0.259242	0.224661	0.460402	0.476408	0.354143		0.228208	0.330676	0.497485	0.409523	0.252869	0.374977	0.413135	0.540389	0.448184	0.399952
3.38	0.229015	0.394132	0.226223	0.217781	0.624643	0.27117	0.229872	0.500211	0.495208	0.383095		0.23118	0.324879	0.496879	0.429457	0.230541	0.40441	0.362779	0.4942	0.396589	0.420358
3.51	0.246855	0.402831	0.233719	0.243193	0.637677	0.275646	0.249365	0.524927	0.516628	0.399286		0.253753	0.3236	0.489097	0.423394	0.198883	0.403525	0.350378	0.422192	0.351013	0.407856
3.64	0.269263	0.413857	0.264243	0.257611	0.654033	0.29702	0.267096	0.552528	0.517663	0.427774		0.266618	0.310281	0.454492	0.438453	0.182506	0.379257	0.347316	0.385323	0.3496	0.373757
3.77	0.28738	0.425989	0.276634	0.279274	0.661642	0.326328	0.284401	0.581068	0.521193	0.440841		0.30986	0.310538	0.461417	0.425314	0.163534	0.347034	0.350627	0.388594	0.364466	0.335808
3.9	0.318676	0.445379	0.27416	0.304364	0.681158	0.345839	0.304457	0.609699	0.548128	0.454768		0.3449	0.279676	0.443243	0.39463	0.155735	0.322043	0.351498	0.38671	0.380314	0.276008
4.03	0.339548	0.458882	0.280672	0.321415	0.683088	0.366445	0.326028	0.626959	0.554257	0.475674		0.36935	0.272455	0.43422	0.370847	0.154251	0.291711	0.355707	0.351515	0.377921	0.243643
4.16	0.360891	0.460354	0.295484	0.340903	0.685703	0.39889	0.333078	0.656233	0.553022	0.503219		0.381221	0.251073	0.412516	0.327197	0.152978	0.263901	0.344625	0.337474	0.371791	0.223524
4.29	0.388983	0.46793	0.301715	0.363267	0.694214	0.420651	0.355395	0.667802	0.589552	0.526276		0.375748	0.246958	0.388594	0.292842	0.149649	0.240653	0.386865	0.318476	0.373626	0.221324
4.42	0.407218	0.489435	0.305208	0.385387	0.703957	0.457976	0.372406	0.688356	0.592971	0.550769		0.375348	0.24286	0.344553	0.254636	0.147386	0.214842	0.378626	0.273444	0.371523	0.206845
4.55	0.433783	0.511371	0.312577	0.401759	0.704982	0.488598	0.397505	0.708214	0.608772	0.572956		0.403915	0.234734	0.323369	0.210645	0.137569	0.197796	0.356476	0.25364	0.346965	0.186623
4.68	0.467114	0.534967	0.315074	0.42059	0.712261	0.50958	0.409756	0.720829	0.612315	0.590196		0.467588	0.241189	0.275468	0.186724	0.13899	0.19849	0.292707	0.245111	0.330865	0.17469
4.81	0.488158	0.557051	0.328134	0.44464	0.703118	0.531042	0.434339	0.727613	0.635816	0.597715		0.460373	0.218417	0.243823	0.178615	0.12599	0.172324	0.251639	0.226146	0.314757	0.157443
4.94	0.518235	0.604195	0.36987	0.466183	0.712695	0.571479	0.465114	0.739859	0.639407	0.611247		0.449667	0.219267	0.226034	0.173735	0.134162	0.180338	0.223636	0.216942	0.287121	0.146899
5.07	0.556425	0.620134	0.368273	0.494448	0.714334	0.602101	0.493173	0.757798	0.642348	0.617884		0.456212	0.217023	0.222842	0.173885	0.139371	0.167548	0.206487	0.195741	0.281548	0.144849
5.2	0.577571	0.628161	0.372696	0.521651	0.709605	0.61715	0.523214	0.760481	0.690804	0.624409		0.483458	0.214621	0.223202	0.170017	0.132543	0.16911	0.190685	0.182691	0.285047	0.140936
5.33	0.600832	0.646023	0.393873	0.547268	0.70971	0.651341	0.551729	0.78143	0.689726	0.636615		0.455441	0.202757	0.222257	0.159645	0.130579	0.182089	0.196534	0.182309	0.272538	0.142651
5.46	0.644958	0.678408	0.430628	0.580185	0.687214	0.683762	0.576905	0.77756	0.692275	0.641299		0.439085	0.206645	0.211848	0.142851	0.129229	0.16197	0.192758	0.175095	0.259763	0.154775
5.59	0.672808	0.703769	0.45707	0.624345	0.678079	0.685246	0.598285	0.781722	0.706022	0.645877		0.415391	0.217948	0.209042	0.1201	0.134379	0.163658	0.203661	0.173617	0.25368	0.157779
5.72	0.692937	0.718969	0.510744	0.653051	0.687472	0.719878	0.630158	0.798657	0.72283	0.655307		0.392325	0.206157	0.194682	0.118543	0.129431	0.170763	0.192345	0.166617	0.259776	0.164894
5.85	0.712204	0.72779	0.549292	0.683168	0.689741	0.746248	0.647982	0.826316	0.727937	0.653654		0.344987	0.202945	0.209854	0.116935	0.128949	0.165269	0.19393	0.146326	0.272574	0.161465
5.98	0.73463	0.725556	0.598101	0.703681	0.679302	0.779801	0.660802	0.834497	0.738327	0.663053		0.315024	0.20548	0.209955	0.119818	0.133124	0.165196	0.181698	0.150555	0.271273	0.146169
6.11	0.751934	0.752382	0.646915	0.714145	0.677059	0.803087	0.691213	0.842272	0.758578	0.664623		0.311203	0.202109	0.194141	0.111521	0.126495	0.160356	0.186081	0.153233	0.270958	0.148298
6.24	0.771432	0.790019	0.689265	0.741147	0.671194	0.794445	0.704428	0.839248	0.753028	0.665401		0.295298	0.200922	0.17665	0.113702	0.12189	0.166923	0.203666	0.166541	0.280889	0.131488
6.37	0.776	0.786936	0.749604	0.759049	0.685671	0.805201	0.723468	0.863447	0.745309	0.670239		0.286142	0.199655	0.191659	0.110646	0.12911	0.168733	0.198981	0.161528	0.28662	0.130193
6.5	0.785865	0.797106	0.807643	0.780111	0.669388	0.843283	0.729065	0.864819	0.759651	0.674592		0.267764	0.201368	0.193612	0.108316	0.12276	0.165121	0.190502	0.156128	0.282914	0.143582
6.63	0.78346	0.810533	0.820436	0.794565	0.667501	0.829259	0.747644	0.867739	0.768977	0.688082		0.271752	0.205877	0.173547	0.110187	0.121214	0.16449	0.182169	0.144456	0.270172	0.154278
6.76	0.792778	0.807331	0.878459	0.808109	0.675056	0.836184	0.752666	0.865548	0.774974	0.675343		0.273159	0.2088	0.179801	0.110866	0.122727	0.169361	0.194457	0.147223	0.268469	0.135532
6.89	0.797346	0.822497	0.896401	0.81917	0.673275	0.831857	0.759345	0.859437	0.767437	0.683847		0.255795	0.201574	0.196186	0.110752	0.123681	0.180586	0.185258	0.148686	0.268773	0.135171
7.02	0.807693	0.825025	0.94259	0.822889	0.677419	0.839178	0.77628	0.853651	0.77101	0.684501		0.225505	0.198866	0.185927	0.107868	0.121998	0.174375	0.187895	0.146785	0.255863	0.13954
7.15	0.814311	0.832886	0.955134	0.823357	0.655928	0.843803	0.783698	0.840705	0.764365	0.689585		0.203905	0.20261	0.200145	0.115679	0.123933	0.171199	0.196116	0.14136	0.245002	0.144999
7.28	0.822421	0.846412	0.965858	0.850743	0.644353	0.849889	0.786018	0.822389	0.762429	0.698087		0.196922	0.19578	0.212292	0.108061	0.120998	0.16706	0.20045	0.138474	0.244924	0.148378
7.41	0.813998	0.827433	0.963617	0.85274	0.636962	0.837453	0.777961	0.809421	0.780996	0.699601		0.181465	0.20812	0.199092	0.105164	0.118502	0.165482	0.193231	0.138388	0.241341	0.14401
7.54	0.816216	0.827059	0.946275	0.843697	0.643177	0.826093	0.780931	0.781954	0.788513	0.71242		0.165983	0.202939	0.201253	0.10998	0.111884	0.167532	0.196903	0.145951	0.232481	0.136047
7.67	0.811031	0.824433	0.942772	0.859974	0.634105	0.826915	0.777327	0.758601	0.770778	0.728707		0.159458	0.204993	0.210163	0.110388	0.114682	0.168185	0.193596	0.150381	0.239689	0.139709
7.8	0.799807	0.785437	0.910261	0.851108	0.625818	0.816914	0.786066	0.729101	0.782481	0.736095		0.149411	0.202832	0.199764	0.1083	0.109833	0.164772	0.195562	0.156208	0.231869	0.14174
7.93	0.772976	0.799894	0.889278	0.838218	0.627236	0.796809	0.78005	0.717903	0.778607	0.750153		0.152285	0.205129	0.210453	0.109043	0.111133	0.171008	0.190662	0.147614	0.241848	0.141215
8.06	0.754831	0.807375	0.840178	0.818615	0.64028	0.776706	0.771348	0.711301	0.749638	0.754211		0.156011	0.195255	0.19935	0.1081	0.111314	0.171712	0.193998	0.142646	0.220831	0.149699
8.19	0.743687	0.80771	0.784448	0.78914	0.62921	0.770262	0.76547	0.699545	0.755705	0.763391		0.162371	0.203118	0.187406	0.11302	0.109373	0.186875	0.185855	0.146786	0.219785	0.152018
8.32	0.718076	0.782306	0.739188	0.759766	0.630723	0.762148	0.760579	0.683926	0.754687	0.790431		0.161837	0.197803	0.198991	0.115088	0.108061	0.172914	0.185118	0.143242	0.223699	0.150835
8.45	0.696552	0.771196	0.690278	0.736219	0.638018	0.731996	0.751729	0.679826	0.743421	0.800179		0.181655	0.194531	0.203907	0.108295	0.116461	0.163589	0.183933	0.136886	0.204248	0.164583
8.58	0.67475	0.783643	0.644747	0.707871	0.649928	0.727911	0.739849	0.6771	0.762213	0.807557		0.198673	0.19083	0.207944	0.112127	0.109652	0.165945	0.204434	0.144615	0.211019	0.161412
8.71	0.642542	0.755131	0.578342	0.681543	0.646516	0.721663	0.729314	0.664171	0.740583	0.813611		0.248214	0.197544	0.198076	0.121045	0.105924	0.158125	0.212138	0.150878	0.201801	0.164014
8.84	0.618927	0.746424	0.557218	0.658955	0.637329	0.695613	0.718505	0.672128	0.743676	0.82786		0.294977	0.19167	0.210825	0.113864	0.111549	0.172369	0.222033	0.149726	0.205074	0.168993
8.97	0.586357	0.725514	0.514458	0.633391	0.633676	0.677117	0.695167	0.671192	0.751556	0.849134		0.33297	0.188475	0.20424	0.119249	0.111696	0.180954	0.220896	0.147725	0.215525	0.164589
9.1	0.545546	0.716072	0.472463	0.610216	0.619761	0.662908	0.678753	0.678212	0.761053	0.86562		0.354559	0.186992	0.193057	0.12481	0.115874	0.170322	0.210178	0.154888	0.207125	0.163626
9.23	0.512312	0.689499	0.448996	0.581349	0.608769	0.655138	0.658325	0.668415	0.757315	0.867006		0.370624	0.188639	0.208667	0.124339	0.110736	0.162079	0.205192	0.153421	0.20562	0.169776
9.36	0.462287	0.686323	0.420443	0.548083	0.616713	0.636817	0.632988	0.667174	0.742105	0.867904		0.383674	0.195899	0.217329	0.131216	0.110767	0.16987	0.214011	0.166906	0.213034	0.166064
9.49	0.427725	0.685093	0.396475	0.517701	0.626047	0.611297	0.626282	0.649547	0.732115	0.873839		0.379259	0.197481	0.236687	0.133103	0.11343	0.166866	0.204796	0.157011	0.21497	0.172565
9.62	0.392209	0.654205	0.397739	0.495511	0.639278	0.600713	0.622148	0.640558	0.72302	0.881801		0.360658	0.192774	0.234604	0.138709	0.109907	0.183851	0.226463	0.166715	0.233132	0.181298
9.75	0.358322	0.648308	0.374711	0.475036	0.624935	0.566914	0.605815	0.637525	0.718909	0.872166		0.35254	0.200149	0.258297	0.140911	0.114527	0.176733	0.235032	0.17461	0.22337	0.167154
9.88	0.32548	0.630835	0.36467	0.448799	0.626271	0.568326	0.594178	0.623122	0.682369	0.864881		0.372737	0.191619	0.263121	0.150206	0.116115	0.174155	0.224339	0.176693	0.223223	0.172967
10.01	0.294147	0.627097	0.352404	0.425178	0.642936	0.542608	0.573773	0.606309	0.68547	0.850698		0.418768	0.193735	0.260601	0.158606	0.127057	0.178695	0.230304	0.176126	0.246569	0.191176
10.14	0.267998	0.624149	0.329299	0.390775	0.648671	0.530293	0.555427	0.593807	0.683298	0.823578		0.47289	0.214594	0.283363	0.182233	0.118921	0.177343	0.241484	0.193437	0.250475	0.199468
10.27	0.246161	0.626193	0.30487	0.365145	0.633858	0.48293	0.529544	0.577801	0.682977	0.808744		0.509339	0.214794	0.305188	0.212322	0.126365	0.181257	0.264727	0.202419	0.267998	0.209625
10.4	0.221535	0.602455	0.304917	0.339362	0.624581	0.4624	0.507079	0.568186	0.650084	0.783258		0.467897	0.198914	0.332271	0.251177	0.138004	0.190922	0.271573	0.220055	0.279583	0.226115
10.53	0.204727	0.573396	0.305982	0.313108	0.607069	0.439006	0.500927	0.545593	0.65416	0.761739		0.409222	0.199533	0.397384	0.280069	0.133747	0.185956	0.294323	0.247208	0.289626	0.254917
10.66	0.192061	0.563442	0.30703	0.287409	0.616474	0.419613	0.490344	0.522681	0.640224	0.736002		0.363827	0.197352	0.426573	0.296191	0.131802	0.189695	0.301734	0.275212	0.315924	0.311219
10.79	0.182687	0.561308	0.297779	0.274638	0.616554	0.400826	0.450774	0.510243	0.637872	0.702736		0.327037	0.197112	0.413625	0.342416	0.139653	0.20688	0.321928	0.315703	0.374024	0.337686
10.92	0.170934	0.552217	0.285804	0.253113	0.610599	0.373188	0.429979	0.485353	0.627128	0.683573		0.269377	0.20494	0.439432	0.417366	0.149702	0.224322	0.326518	0.392876	0.40733	0.332639
11.05	0.161791	0.528017	0.281888	0.221961	0.610389	0.36917	0.409083	0.446814	0.607529	0.656818		0.240946	0.217714	0.442456	0.466903	0.166292	0.237852	0.301428	0.457637	0.427538	0.29982
11.18	0.155385	0.527515	0.261281	0.200679	0.610883	0.349626	0.381948	0.438387	0.603253	0.610737		0.219354	0.224725	0.474543	0.502543	0.176645	0.259511	0.298689	0.513482	0.453365	0.292376
11.31	0.157359	0.529759	0.249211	0.181755	0.598433	0.329391	0.36726	0.408089	0.575448	0.580325		0.19822	0.225855	0.467505	0.541619	0.191568	0.288854	0.324783	0.545702	0.450521	0.306479
11.44	0.151646	0.512162	0.243162	0.16046	0.592727	0.310674	0.334155	0.36519	0.56907	0.531755		0.190762	0.237128	0.466609	0.565481	0.212422	0.338493	0.36535	0.561486	0.462933	0.343432
11.57	0.154363	0.49005	0.24924	0.140878	0.584447	0.301933	0.323705	0.345658	0.555984	0.50324		0.181903	0.230841	0.501382	0.545684	0.215421	0.431261	0.382846	0.608173	0.482173	0.33895
11.7	0.151598	0.486458	0.230343	0.132987	0.578786	0.285579	0.307585	0.32665	0.537961	0.456847		0.160124	0.245957	0.500744	0.488065	0.205954	0.488063	0.414968	0.621887	0.459565	0.354974
11.83	0.158636	0.498588	0.233879	0.123031	0.587936	0.274508	0.272725	0.295527	0.53401	0.413125		0.143399	0.270669	0.431277	0.470071	0.207267	0.559904	0.462831	0.569698	0.463061	0.383358
11.96	0.150435	0.473968	0.219356	0.119784	0.574292	0.281247	0.262271	0.273748	0.513148	0.387417		0.132121	0.298942	0.391488	0.445716	0.207867	0.608699	0.460793	0.512367	0.452585	0.382256
12.09	0.147592	0.478597	0.220417	0.122813	0.564827	0.262062	0.24786	0.243256	0.483525	0.36081		0.148112	0.314915	0.396095	0.377392	0.211297	0.617864	0.43563	0.488481	0.45179	0.381288
12.22	0.146417	0.453819	0.199702	0.118136	0.551115	0.249821	0.230639	0.230637	0.455595	0.328079		0.146504	0.336461	0.414112	0.312737	0.247212	0.583336	0.464075	0.473688	0.455151	0.339196
12.35	0.15336	0.430966	0.199677	0.115052	0.525053	0.259065	0.207794	0.215331	0.446898	0.30999		0.159003	0.380054	0.400852	0.266906	0.283955	0.539688	0.460016	0.448666	0.448084	0.305875
12.48	0.150005	0.41327	0.200228	0.110787	0.506784	0.245472	0.196271	0.189537	0.42639	0.282197		0.158796	0.430435	0.406727	0.236195	0.303684	0.504104	0.416851	0.429397	0.432108	0.28282
12.61	0.147554	0.416955	0.17753	0.102825	0.497358	0.241554	0.198919	0.179288	0.415074	0.250059		0.153033	0.48776	0.431928	0.189805	0.319335	0.494102	0.378897	0.400393	0.434413	0.276339
12.74	0.147086	0.396966	0.164034	0.107764	0.474054	0.242535	0.184425	0.172424	0.411338	0.24356		0.150983	0.546987	0.431093	0.157736	0.34857	0.470859	0.383836	0.356367	0.4312	0.300209
12.87	0.142498	0.379864	0.187634	0.105735	0.445051	0.231285	0.187085	0.152836	0.383535	0.220503		0.149629	0.595649	0.372631	0.140411	0.373971	0.431774	0.375961	0.339685	0.438317	0.361159
13	0.137317	0.371333	0.176868	0.100825	0.420341	0.255845	0.186674	0.149177	0.354201	0.212686		0.154653	0.650196	0.336232	0.139018	0.401132	0.369381	0.324014	0.337992	0.419062	0.449055
13.13	0.136161	0.36004	0.17316	0.0985125	0.401107	0.229983	0.182727	0.133624	0.340013	0.1887		0.144589	0.711624	0.290771	0.135557	0.435198	0.312156	0.262699	0.365804	0.426394	0.522473
13.26	0.139106	0.366104	0.182758	0.0966063	0.382991	0.240147	0.190352	0.128734	0.327228	0.174541		0.151977	0.751506	0.251391	0.123526	0.454626	0.269753	0.233432	0.314899	0.430219	0.518028
13.39	0.13687	0.349245	0.17502	0.0964734	0.380488	0.261786	0.191476	0.12457	0.310565	0.164852		0.163366	0.737091	0.236691	0.129176	0.458975	0.252503	0.200152	0.274293	0.401526	0.422216
13.52	0.137597	0.338309	0.157246	0.106915	0.355819	0.259292	0.186971	0.120406	0.288373	0.146026		0.173138	0.743264	0.217667	0.115247	0.429528	0.232795	0.20073	0.262557	0.370438	0.336869
13.65	0.141801	0.328806	0.156554	0.104804	0.337703	0.251936	0.174815	0.119152	0.284184	0.14492		0.178771	0.737257	0.195622	0.121354	0.396332	0.210788	0.198009	0.245578	0.35716	0.272258
13.78	0.1365	0.334915	0.159685	0.1064	0.335609	0.231152	0.190224	0.120723	0.273794	0.140314		0.159986	0.704105	0.207538	0.133249	0.397674	0.21166	0.191171	0.225891	0.332057	0.226601
13.91	0.124291	0.309796	0.158281	0.107452	0.315455	0.239572	0.18535	0.121107	0.281053	0.143381		0.138804	0.66109	0.207724	0.118433	0.423809	0.203278	0.184707	0.214883	0.327081	0.187063
14.04	0.132689	0.313131	0.170773	0.0945617	0.298042	0.235518	0.179157	0.115976	0.251257	0.146629		0.132477	0.63746	0.204462	0.112237	0.425647	0.197361	0.206286	0.212237	0.317307	0.166254
14.17	0.127872	0.324908	0.171101	0.10452	0.290288	0.233073	0.181859	0.115991	0.250204	0.145731		0.132283	0.614506	0.20689	0.112636	0.416527	0.182891	0.199979	0.222899	0.302688	0.158136
14.3	0.126904	0.304058	0.159508	0.108363	0.260602	0.237243	0.181976	0.112085	0.247373	0.142956		0.128972	0.534382	0.196248	0.106258	0.407279	0.186477	0.216246	0.209146	0.290633	0.145646
14.43	0.126173	0.292924	0.1768	0.115967	0.237229	0.241068	0.175678	0.114139	0.235281	0.13846		0.133594	0.475481	0.186216	0.113922	0.363903	0.191534	0.230719	0.216281	0.286752	0.140426
14.56	0.127585	0.27915	0.161003	0.122171	0.232638	0.233194	0.171742	0.115748	0.237885	0.137378		0.122344	0.444281	0.194274	0.119136	0.300725	0.170373	0.207898	0.244513	0.26744	0.138254
14.69	0.128553	0.277768	0.167383	0.125815	0.213694	0.231982	0.158116	0.110035	0.208798	0.131133		0.125249	0.401587	0.182148	0.119655	0.229147	0.163125	0.175119	0.246342	0.245362	0.145516
14.82	0.106178	0.255677	0.177513		0.191216	0.197783						0.102107	0.335196	0.190901		0.179675	0.133762
14.95
15.08
15.21
15.34
15.47
15.6

## Sheet: Centromere Distances
Each value represents the avearge for individual embryos (measured from at least 8 anaphases)
	BUFFER	TEV	ICRF	TEV+ICRF
	7.36757	4.13467	13.0993	6.21919
	10.8637	6.52982	7.09713	11.867
	12.0365	6.60629	11.9891	8.4074
	10.2457	6.40679	12.1217	8.10879
	12.877	6.72114	13.4434	12.081
	10.3221	5.73639	11.372	9.43539
	11.385	4.83382	9.5452	8.82867
	8.97302	6.6152	8.43649	8.96999
	11.553	7.03002	11.5102	9.10716
	9.42035	6.22964	11.4561	15.993
	12.8904			9.4025
	BUFFER	TEV	ICRF	TEV+ICRF
Number of values	11	10	10	11
Minimum	7.368	4.135	7.097	6.219
25% Percentile	9.42	5.511	9.268	8.407
Median	10.86	6.468	11.48	9.107
75% Percentile	12.04	6.642	12.37	11.87
Maximum	12.89	7.03	13.44	15.99
Mean	10.72	6.084	11.01	9.856
Std. Deviation	1.692	0.9228	2.031	2.604
Std. Error of Mean	0.51	0.2918	0.6424	0.7852
Lower 95% CI of mean	9.585	5.424	9.554	8.107
Upper 95% CI of mean	11.86	6.744	12.46	11.61
Sum	117.9	60.84	110.1	108.4
D'Agostino & Pearson normality test
K2	0.8023	4.932	1.769	6.666
P value	0.6695	0.0849	0.4128	0.0357
Passed normality test (alpha=0.05)?	Yes	Yes	Yes	No
P value summary	ns	ns	ns	*
Kruskal-Wallis test
Multiple comparisons
Number of families	1
Number of comparisons per family	6
Alpha	0.05
Dunn's multiple comparisons test	Mean rank diff,	Significant?	Summary	Adjusted P Value
BUFFER vs. TEV	21.53	Yes	***	0.0004	A-B
BUFFER vs. ICRF	-1.573	No	ns	>0,9999	A-C
BUFFER vs. MIX	5.636	No	ns	>0,9999	A-D
TEV vs. ICRF	-23.1	Yes	***	0.0002	B-C
TEV vs. MIX	-15.89	Yes	*	0.0182	B-D
ICRF vs. MIX	7.209	No	ns	>0,9999	C-D
Test details	Mean rank 1	Mean rank 2	Mean rank diff,	n1	n2
BUFFER vs. TEV	27.73	6.2	21.53	11	10
BUFFER vs. ICRF	27.73	29.3	-1.573	11	10
BUFFER vs. MIX	27.73	22.09	5.636	11	11
TEV vs. ICRF	6.2	29.3	-23.1	10	10
TEV vs. MIX	6.2	22.09	-15.89	10	11
ICRF vs. MIX	29.3	22.09	7.209	10	11
